# Supplementary material for: Detecting Global Influence of Transcription Factor Interactions on Gene Expression in Lymphoblastoid Cells Using Neural Network Models.
Source: Research Square preprint supplement (doi:10.21203/rs.3.rs-406028/v2), 2021-08-03
Supplement: Supplementary file 1 [file 5fdd08ae71f4b63441dbd7ef.xlsx]

## Sheet: S5
Interaction	Gene	chromosome_name	TF_upstream_Start	TF_upstream_End	TF_downstream_Start	TF_downstream_End	Regulatory_program
FOXM1-PKNOX1	ENSG00000000419	20	49574992	49575512	49574966	49575390	HiC_interaction_with_promoter-1
ATF2-ESRRA	ENSG00000000419	20	49574912	49575276	49574999	49575204	HiC_interaction_with_promoter-1
ATF2-ESRRA	ENSG00000000419	20	49574912	49575276	49574803	49575323	HiC_interaction_with_promoter-1
MAZ-PBX3	ENSG00000000419	20	49574811	49575235	49574942	49575158	HiC_interaction_with_promoter-1
ATF2-RELB	ENSG00000000419	20	49574719	49575662	49574999	49575204	HiC_interaction_with_promoter-1
ATF2-RELB	ENSG00000000419	20	49574719	49575662	49574803	49575323	HiC_interaction_with_promoter-1
FOXM1-GATAD2B	ENSG00000000457	1	169884917	169885171	169884789	169885309	HiC_interaction_with_promoter-1
ATF2-RELB	ENSG00000000457	1	169859780	169860284	169884764	169885221	HiC_interaction_with_promoter-1
ATF2-RELB	ENSG00000000457	1	169859780	169860284	169884764	169885337	HiC_interaction_with_promoter-1
ATF2-RELB	ENSG00000000457	1	169884907	169885195	169884764	169885221	HiC_interaction_with_promoter-1
ATF2-RELB	ENSG00000000457	1	169884907	169885195	169884764	169885337	HiC_interaction_with_promoter-1
ATF2-RELB	ENSG00000000457	1	169884873	169885220	169884764	169885221	HiC_interaction_with_promoter-1
ATF2-RELB	ENSG00000000457	1	169884873	169885220	169884764	169885337	HiC_interaction_with_promoter-1
GATAD2B-RELA	ENSG00000000457	1	169884899	169885283	169884917	169885171	HiC_interaction_with_promoter-1
FOXM1-PKNOX1	ENSG00000000457	1	169884789	169885309	169884836	169885260	HiC_interaction_with_promoter-1
RELB-SPI1	ENSG00000000457	1	169884988	169885217	169884764	169885221	HiC_interaction_with_promoter-1
RELB-SPI1	ENSG00000000457	1	169884988	169885217	169884764	169885337	HiC_interaction_with_promoter-1
FOXM1-GATAD2B	ENSG00000000938	1	27944964	27945484	27989582	27990102	HiC_interaction_with_promoter-1
FOXM1-GATAD2B	ENSG00000000938	1	27929649	27930169	27989582	27990102	HiC_interaction_with_promoter-1
FOXM1-PKNOX1	ENSG00000000938	1	27984936	27985551	27989582	27990102	HiC_interaction_with_promoter-1
ATF2-RELB	ENSG00000001084	6	53409668	53410172	53409752	53410073	HiC_interaction_with_promoter-1
ATF2-RELB	ENSG00000001084	6	53409640	53410160	53409752	53410073	HiC_interaction_with_promoter-1
ASH2L-MAZ	ENSG00000001084	6	53409449	53410033	53409665	53410101	HiC_interaction_with_promoter-1
ASH2L-MAZ	ENSG00000001084	6	53409449	53410033	53409695	53410119	HiC_interaction_with_promoter-1
ASH2L-MAZ	ENSG00000001084	6	53409449	53410033	53409897	53410321	HiC_interaction_with_promoter-1
ASH2L-MAZ	ENSG00000001084	6	53409449	53410033	53409864	53410300	HiC_interaction_with_promoter-1
EP300-TAF1	ENSG00000001084	6	53409683	53410019	53409665	53410025	HiC_interaction_with_promoter-1
FOXM1-GATAD2B	ENSG00000001167	6	41039867	41040387	41039570	41040090	HiC_interaction_with_promoter-1
ARID3A-GATAD2B	ENSG00000001167	6	41039867	41040387	41039891	41040241	HiC_interaction_with_promoter-1
MLLT1-RFX5	ENSG00000001167	6	41039719	41040106	41039897	41040233	HiC_interaction_with_promoter-1
RELB-STAT1	ENSG00000001167	6	41039941	41040541	41039835	41040199	HiC_interaction_with_promoter-1
ARID3A-GATAD2B	ENSG00000001460	1	24739694	24740214	24739832	24740182	HiC_interaction_with_promoter-1
ARID3A-GATAD2B	ENSG00000001461	1	24739832	24740182	24739694	24740214	HiC_interaction_with_promoter-1
RELB-ZNF592	ENSG00000002822	7	2139935	2140219	2249431	2250031	HiC_interaction_with_promoter-1
ASH2L-JUND	ENSG00000002834	17	37009913	37010197	37024778	37025362	HiC_interaction_with_promoter-1
ASH2L-JUND	ENSG00000002834	17	37009913	37010197	37009626	37010210	HiC_interaction_with_promoter-1
JUND-RELB	ENSG00000002834	17	37009913	37010197	37054929	37055529	HiC_interaction_with_promoter-1
JUND-RELB	ENSG00000002834	17	37009913	37010197	37009738	37010433	HiC_interaction_with_promoter-1
JUND-RELB	ENSG00000002834	17	37009913	37010197	37019811	37020411	HiC_interaction_with_promoter-1
ATF2-RELB	ENSG00000002834	17	37054991	37055511	37054929	37055529	HiC_interaction_with_promoter-1
ATF2-RELB	ENSG00000002834	17	37009913	37010323	37054929	37055529	HiC_interaction_with_promoter-1
ATF2-RELB	ENSG00000002834	17	37009913	37010323	37009738	37010433	HiC_interaction_with_promoter-1
ATF2-RELB	ENSG00000002834	17	37009913	37010323	37019811	37020411	HiC_interaction_with_promoter-1
ATF2-RELB	ENSG00000002834	17	37009898	37010418	37054929	37055529	HiC_interaction_with_promoter-1
ATF2-RELB	ENSG00000002834	17	37009898	37010418	37009738	37010433	HiC_interaction_with_promoter-1
ATF2-RELB	ENSG00000002834	17	37009898	37010418	37019811	37020411	HiC_interaction_with_promoter-1
ATF2-RELB	ENSG00000002834	17	37009910	37010414	37054929	37055529	HiC_interaction_with_promoter-1
ATF2-RELB	ENSG00000002834	17	37009910	37010414	37009738	37010433	HiC_interaction_with_promoter-1
ATF2-RELB	ENSG00000002834	17	37009910	37010414	37019811	37020411	HiC_interaction_with_promoter-1
ATF2-RELB	ENSG00000002834	17	37024782	37025286	37054929	37055529	HiC_interaction_with_promoter-1
CREM-RELA	ENSG00000002834	17	37009951	37010251	37054981	37055365	HiC_interaction_with_promoter-1
GATAD2B-RELA	ENSG00000002834	17	37009614	37010134	37054981	37055365	HiC_interaction_with_promoter-1
ASH2L-MAZ	ENSG00000002834	17	37009852	37010276	37024778	37025362	HiC_interaction_with_promoter-1
ASH2L-MAZ	ENSG00000002834	17	37009852	37010276	37009626	37010210	HiC_interaction_with_promoter-1
ASH2L-MAZ	ENSG00000002834	17	37009846	37010282	37024778	37025362	HiC_interaction_with_promoter-1
ASH2L-MAZ	ENSG00000002834	17	37009846	37010282	37009626	37010210	HiC_interaction_with_promoter-1
ATF2-ESRRA	ENSG00000002834	17	37054955	37055319	37054991	37055511	HiC_interaction_with_promoter-1
EP300-TAF1	ENSG00000002834	17	37009788	37010092	37054995	37055275	HiC_interaction_with_promoter-1
EP300-TAF1	ENSG00000002834	17	37009788	37010092	37009854	37010224	HiC_interaction_with_promoter-1
EP300-TAF1	ENSG00000002834	17	37009788	37010092	37009840	37010200	HiC_interaction_with_promoter-1
EP300-TAF1	ENSG00000002834	17	37009772	37010141	37054995	37055275	HiC_interaction_with_promoter-1
EP300-TAF1	ENSG00000002834	17	37009772	37010141	37009854	37010224	HiC_interaction_with_promoter-1
EP300-TAF1	ENSG00000002834	17	37009772	37010141	37009840	37010200	HiC_interaction_with_promoter-1
RELB-SPI1	ENSG00000002834	17	37009738	37010433	37009882	37010110	HiC_interaction_with_promoter-1
ATF2-JUND	ENSG00000002834	17	37009913	37010197	37054991	37055511	HiC_interaction_with_promoter-1
ATF2-JUND	ENSG00000002834	17	37009913	37010197	37009913	37010323	HiC_interaction_with_promoter-1
ATF2-JUND	ENSG00000002834	17	37009913	37010197	37009898	37010418	HiC_interaction_with_promoter-1
ATF2-JUND	ENSG00000002834	17	37009913	37010197	37009910	37010414	HiC_interaction_with_promoter-1
ATF2-JUND	ENSG00000002834	17	37009913	37010197	37024782	37025286	HiC_interaction_with_promoter-1
ASH2L-MAZ	ENSG00000002919	17	46184769	46185353	46184908	46185332	HiC_interaction_with_promoter-1
ASH2L-MAZ	ENSG00000002919	17	46184769	46185353	46184912	46185348	HiC_interaction_with_promoter-1
GATAD2B-RELA	ENSG00000002919	17	46184890	46185410	46184625	46185009	HiC_interaction_with_promoter-1
MAZ-PBX3	ENSG00000002919	17	46184786	46185002	46184908	46185332	HiC_interaction_with_promoter-1
MAZ-PBX3	ENSG00000002919	17	46184786	46185002	46184912	46185348	HiC_interaction_with_promoter-1
MAZ-PBX3	ENSG00000002919	17	46184784	46185004	46184908	46185332	HiC_interaction_with_promoter-1
MAZ-PBX3	ENSG00000002919	17	46184784	46185004	46184912	46185348	HiC_interaction_with_promoter-1
ATF2-RELB	ENSG00000002919	17	46184761	46185265	46184994	46185200	HiC_interaction_with_promoter-1
ATF2-RELB	ENSG00000002919	17	46184982	46185486	46184994	46185200	HiC_interaction_with_promoter-1
GATAD2B-PBX3	ENSG00000002919	17	46184786	46185002	46184890	46185410	HiC_interaction_with_promoter-1
GATAD2B-PBX3	ENSG00000002919	17	46184784	46185004	46184890	46185410	HiC_interaction_with_promoter-1
EP300-TAF1	ENSG00000004468	4	15779784	15780124	15779806	15780166	HiC_interaction_with_promoter-1
ARID3A-GATAD2B	ENSG00000004478	12	2904847	2905197	2904825	2905132	HiC_interaction_with_promoter-1
CREM-RELA	ENSG00000004864	7	95949849	95950233	95949874	95950234	HiC_interaction_with_promoter-1
FOXK2-MTA2	ENSG00000005187	16	20774762	20775322	20774752	20775162	HiC_interaction_with_promoter-1
FOXM1-PKNOX1	ENSG00000005194	16	57509663	57510087	57509493	57510013	HiC_interaction_with_promoter-1
CREM-RELA	ENSG00000005379	17	56409895	56410255	56409673	56410057	HiC_interaction_with_promoter-1
CREM-RELA	ENSG00000005379	17	56394894	56395254	56409673	56410057	HiC_interaction_with_promoter-1
CREM-RELA	ENSG00000005379	17	56409694	56410054	56409673	56410057	HiC_interaction_with_promoter-1
EP300-TAF1	ENSG00000005379	17	56409697	56410007	56409831	56410201	HiC_interaction_with_promoter-1
EP300-TAF1	ENSG00000005379	17	56409697	56410007	56409835	56410195	HiC_interaction_with_promoter-1
FOXM1-GATAD2B	ENSG00000005448	2	74684844	74685364	74699599	74700119	HiC_interaction_with_promoter-1
FOXM1-GATAD2B	ENSG00000005448	2	74684639	74685159	74699599	74700119	HiC_interaction_with_promoter-1
ATF2-NRF1	ENSG00000005448	2	74684970	74685474	74699814	74700064	HiC_interaction_with_promoter-1
JUND-RELB	ENSG00000005448	2	74684785	74685397	74699719	74700003	HiC_interaction_with_promoter-1
ATF2-RELB	ENSG00000005448	2	74684785	74685397	74699766	74700286	HiC_interaction_with_promoter-1
ATF2-RELB	ENSG00000005448	2	74684785	74685397	74699560	74700080	HiC_interaction_with_promoter-1
ATF2-RELB	ENSG00000005448	2	74684785	74685397	74684970	74685474	HiC_interaction_with_promoter-1
ARID3A-GATAD2B	ENSG00000005448	2	74684862	74685212	74684844	74685364	HiC_interaction_with_promoter-1
ARID3A-GATAD2B	ENSG00000005448	2	74684862	74685212	74684639	74685159	HiC_interaction_with_promoter-1
CREM-RELA	ENSG00000005448	2	74684644	74685004	74699726	74700110	HiC_interaction_with_promoter-1
ASH2L-MAZ	ENSG00000005448	2	74684604	74685028	74699491	74700075	HiC_interaction_with_promoter-1
ASH2L-MAZ	ENSG00000005448	2	74684860	74685284	74699491	74700075	HiC_interaction_with_promoter-1
ASH2L-MAZ	ENSG00000005448	2	74684575	74685011	74699491	74700075	HiC_interaction_with_promoter-1
EP300-TAF1	ENSG00000005448	2	74684876	74685216	74684925	74685285	HiC_interaction_with_promoter-1
ATF2-JUND	ENSG00000005448	2	74684970	74685474	74699719	74700003	HiC_interaction_with_promoter-1
RELB-STAT1	ENSG00000005448	2	74684785	74685397	74684847	74685211	HiC_interaction_with_promoter-1
RELB-STAT1	ENSG00000005448	2	74684785	74685397	74699688	74700052	HiC_interaction_with_promoter-1
GATAD2B-PBX3	ENSG00000005469	7	86974750	86975270	86974787	86975003	HiC_interaction_with_promoter-1
ASH2L-MAZ	ENSG00000005469	7	86974595	86975031	86974788	86975372	HiC_interaction_with_promoter-1
ASH2L-MAZ	ENSG00000005469	7	86974595	86975031	86974516	86975100	HiC_interaction_with_promoter-1
MAZ-PBX3	ENSG00000005469	7	86974595	86975031	86974787	86975003	HiC_interaction_with_promoter-1
ATF2-RELB	ENSG00000005469	7	86974527	86975031	86974568	86975168	HiC_interaction_with_promoter-1
FOXM1-GATAD2B	ENSG00000005844	16	30484904	30485431	30484845	30485365	HiC_interaction_with_promoter-1
MLLT1-RFX5	ENSG00000005844	16	30469675	30470980	30469937	30470273	HiC_interaction_with_promoter-1
ATF2-RELB	ENSG00000005844	16	30469802	30470506	30484884	30485404	HiC_interaction_with_promoter-1
ATF2-RELB	ENSG00000005844	16	30469802	30470506	30484892	30485396	HiC_interaction_with_promoter-1
ATF2-RELB	ENSG00000005844	16	30484883	30485290	30484884	30485404	HiC_interaction_with_promoter-1
ATF2-RELB	ENSG00000005844	16	30484883	30485290	30484892	30485396	HiC_interaction_with_promoter-1
ATF2-RELB	ENSG00000005844	16	30469802	30470678	30484884	30485404	HiC_interaction_with_promoter-1
ATF2-RELB	ENSG00000005844	16	30469802	30470678	30484892	30485396	HiC_interaction_with_promoter-1
RELB-STAT1	ENSG00000005844	16	30469802	30470506	30469894	30470258	HiC_interaction_with_promoter-1
RELB-STAT1	ENSG00000005844	16	30469802	30470678	30469894	30470258	HiC_interaction_with_promoter-1
FOXM1-PKNOX1	ENSG00000006007	16	19534949	19535469	19534950	19535374	HiC_interaction_with_promoter-1
ATF2-RELB	ENSG00000006015	19	18699513	18700017	18699561	18700161	HiC_interaction_with_promoter-1
RELB-STAT1	ENSG00000006015	19	18699572	18700002	18699561	18700161	HiC_interaction_with_promoter-1
FOXM1-GATAD2B	ENSG00000006062	17	43384607	43385127	43384980	43385500	HiC_interaction_with_promoter-1
FOXM1-GATAD2B	ENSG00000006062	17	43379941	43380461	43379955	43380475	HiC_interaction_with_promoter-1
FOXM1-GATAD2B	ENSG00000006062	17	43379941	43380461	43384980	43385500	HiC_interaction_with_promoter-1
FOXM1-GATAD2B	ENSG00000006062	17	43354484	43355004	43379955	43380475	HiC_interaction_with_promoter-1
FOXM1-GATAD2B	ENSG00000006062	17	43354484	43355004	43384980	43385500	HiC_interaction_with_promoter-1
ASH2L-JUND	ENSG00000006062	17	43384687	43385271	43384695	43385005	HiC_interaction_with_promoter-1
JUND-RELB	ENSG00000006062	17	43384695	43385005	43384801	43385080	HiC_interaction_with_promoter-1
JUND-RELB	ENSG00000006062	17	43384695	43385005	43384882	43385482	HiC_interaction_with_promoter-1
ESRRA-JUND	ENSG00000006062	17	43324833	43325197	43384695	43385005	HiC_interaction_with_promoter-1
ATF2-RELB	ENSG00000006062	17	43384739	43385047	43384801	43385080	HiC_interaction_with_promoter-1
ATF2-RELB	ENSG00000006062	17	43384739	43385047	43384882	43385482	HiC_interaction_with_promoter-1
ATF2-RELB	ENSG00000006062	17	43384719	43385045	43384801	43385080	HiC_interaction_with_promoter-1
ATF2-RELB	ENSG00000006062	17	43384719	43385045	43384882	43385482	HiC_interaction_with_promoter-1
ATF2-RELB	ENSG00000006062	17	43324754	43325258	43384801	43385080	HiC_interaction_with_promoter-1
ATF2-RELB	ENSG00000006062	17	43324754	43325258	43384882	43385482	HiC_interaction_with_promoter-1
ATF2-RELB	ENSG00000006062	17	43384838	43385342	43384801	43385080	HiC_interaction_with_promoter-1
ATF2-RELB	ENSG00000006062	17	43384838	43385342	43384882	43385482	HiC_interaction_with_promoter-1
ATF2-RELB	ENSG00000006062	17	43379922	43380426	43384801	43385080	HiC_interaction_with_promoter-1
ATF2-RELB	ENSG00000006062	17	43379922	43380426	43384882	43385482	HiC_interaction_with_promoter-1
ARID3A-GATAD2B	ENSG00000006062	17	43379864	43380214	43379955	43380475	HiC_interaction_with_promoter-1
ARID3A-GATAD2B	ENSG00000006062	17	43379864	43380214	43384980	43385500	HiC_interaction_with_promoter-1
CREM-RELA	ENSG00000006062	17	43384661	43385045	43384697	43385057	HiC_interaction_with_promoter-1
GATAD2B-RELA	ENSG00000006062	17	43384661	43385045	43384980	43385500	HiC_interaction_with_promoter-1
FOXM1-PKNOX1	ENSG00000006062	17	43384750	43385135	43384607	43385127	HiC_interaction_with_promoter-1
FOXM1-PKNOX1	ENSG00000006062	17	43384750	43385135	43394688	43395208	HiC_interaction_with_promoter-1
ASH2L-MAZ	ENSG00000006062	17	43384696	43385120	43384687	43385271	HiC_interaction_with_promoter-1
ASH2L-MAZ	ENSG00000006062	17	43324912	43325348	43384687	43385271	HiC_interaction_with_promoter-1
ASH2L-MAZ	ENSG00000006062	17	43324918	43325342	43384687	43385271	HiC_interaction_with_promoter-1
ATF2-ESRRA	ENSG00000006062	17	43324833	43325197	43384739	43385047	HiC_interaction_with_promoter-1
ATF2-ESRRA	ENSG00000006062	17	43324833	43325197	43384719	43385045	HiC_interaction_with_promoter-1
ATF2-ESRRA	ENSG00000006062	17	43324833	43325197	43384838	43385342	HiC_interaction_with_promoter-1
ATF2-ESRRA	ENSG00000006062	17	43324833	43325197	43379922	43380426	HiC_interaction_with_promoter-1
ATF2-JUND	ENSG00000006062	17	43384739	43385047	43384695	43385005	HiC_interaction_with_promoter-1
ATF2-JUND	ENSG00000006062	17	43384719	43385045	43384695	43385005	HiC_interaction_with_promoter-1
ATF2-JUND	ENSG00000006062	17	43324754	43325258	43384695	43385005	HiC_interaction_with_promoter-1
ATF2-JUND	ENSG00000006062	17	43384838	43385342	43384695	43385005	HiC_interaction_with_promoter-1
ATF2-JUND	ENSG00000006062	17	43379922	43380426	43384695	43385005	HiC_interaction_with_promoter-1
FOXM1-GATAD2B	ENSG00000006075	17	34409525	34410045	34419583	34420103	HiC_interaction_with_promoter-1
FOXM1-GATAD2B	ENSG00000006075	17	34409741	34410261	34419583	34420103	HiC_interaction_with_promoter-1
RELB-SPI1	ENSG00000006075	17	34409603	34410030	34419732	34420008	HiC_interaction_with_promoter-1
RELB-SPI1	ENSG00000006075	17	34409603	34410006	34419732	34420008	HiC_interaction_with_promoter-1
ATF2-RELB	ENSG00000006075	17	34409603	34410030	34419581	34420085	HiC_interaction_with_promoter-1
ATF2-RELB	ENSG00000006075	17	34409603	34410030	34419556	34420076	HiC_interaction_with_promoter-1
ATF2-RELB	ENSG00000006075	17	34409603	34410006	34419581	34420085	HiC_interaction_with_promoter-1
ATF2-RELB	ENSG00000006075	17	34409603	34410006	34419556	34420076	HiC_interaction_with_promoter-1
FOXM1-GATAD2B	ENSG00000006659	19	40169932	40170452	40169832	40170352	HiC_interaction_with_promoter-1
ARID3A-GATAD2B	ENSG00000006659	19	40169722	40170072	40169832	40170352	HiC_interaction_with_promoter-1
EP300-TAF1	ENSG00000006659	19	40169841	40170181	40169833	40170203	HiC_interaction_with_promoter-1
EP300-TAF1	ENSG00000006659	19	40169841	40170181	40169848	40170208	HiC_interaction_with_promoter-1
EP300-TAF1	ENSG00000006659	19	40169905	40170241	40169833	40170203	HiC_interaction_with_promoter-1
EP300-TAF1	ENSG00000006659	19	40169905	40170241	40169848	40170208	HiC_interaction_with_promoter-1
EP300-TAF1	ENSG00000006659	19	40169677	40170013	40169833	40170203	HiC_interaction_with_promoter-1
EP300-TAF1	ENSG00000006659	19	40169677	40170013	40169848	40170208	HiC_interaction_with_promoter-1
ATF2-RELB	ENSG00000006659	19	40169744	40170346	40194982	40195582	HiC_interaction_with_promoter-1
ATF2-RELB	ENSG00000006659	19	40169744	40170346	40169816	40170016	HiC_interaction_with_promoter-1
ATF2-RELB	ENSG00000006712	19	39894265	39895029	39899948	39900341	HiC_interaction_with_promoter-1
SRF-ZNF592	ENSG00000006715	7	38944975	38945175	38944867	38945151	HiC_interaction_with_promoter-1
SRF-ZNF592	ENSG00000006715	7	38944794	38945313	38944867	38945151	HiC_interaction_with_promoter-1
SRF-ZNF592	ENSG00000006715	7	38944979	38945141	38944867	38945151	HiC_interaction_with_promoter-1
RELB-ZNF592	ENSG00000006715	7	38944867	38945151	38944879	38945479	HiC_interaction_with_promoter-1
EP300-TAF1	ENSG00000006831	12	1799945	1800084	1799946	1800316	HiC_interaction_with_promoter-1
EP300-TAF1	ENSG00000006831	12	1799945	1800084	1799957	1800317	HiC_interaction_with_promoter-1
EP300-TAF1	ENSG00000006831	12	1799967	1800067	1799946	1800316	HiC_interaction_with_promoter-1
EP300-TAF1	ENSG00000006831	12	1799967	1800067	1799957	1800317	HiC_interaction_with_promoter-1
MLLT1-RFX5	ENSG00000006831	12	1799977	1800313	1799530	1800106	HiC_interaction_with_promoter-1
RELB-STAT1	ENSG00000006831	12	1799644	1800244	1799811	1800175	HiC_interaction_with_promoter-1
FOXM1-GATAD2B	ENSG00000007129	19	42069686	42070206	42069599	42070119	HiC_interaction_with_promoter-1
ATF2-RELB	ENSG00000007168	17	2474988	2475588	2614922	2615426	HiC_interaction_with_promoter-1
ATF2-RELB	ENSG00000007168	17	2474988	2475588	2614906	2615426	HiC_interaction_with_promoter-1
RELB-STAT1	ENSG00000007168	17	2474988	2475588	2614959	2615323	HiC_interaction_with_promoter-1
FOXK2-MTA2	ENSG00000007312	17	61999678	62000238	62009615	62010025	HiC_interaction_with_promoter-1
FOXK2-MTA2	ENSG00000007312	17	62009581	62010141	62009615	62010025	HiC_interaction_with_promoter-1
RELB-SPI1	ENSG00000007312	17	61999711	62000311	61999819	62000046	HiC_interaction_with_promoter-1
RELB-STAT1	ENSG00000007312	17	62009938	62010302	62009649	62010249	HiC_interaction_with_promoter-1
RELB-SPI1	ENSG00000007341	1	113164724	113165324	113164865	113165018	HiC_interaction_with_promoter-1
RELB-SPI1	ENSG00000007384	16	134819	135185	134927	135164	HiC_interaction_with_promoter-1
RELB-SPI1	ENSG00000007384	16	134868	135212	134927	135164	HiC_interaction_with_promoter-1
RELB-SPI1	ENSG00000007384	16	84818	85418	134927	135164	HiC_interaction_with_promoter-1
ASH2L-MAZ	ENSG00000007516	16	1359700	1360124	1359471	1360055	HiC_interaction_with_promoter-1
ASH2L-MAZ	ENSG00000007520	16	1359700	1360124	1359471	1360055	HiC_interaction_with_promoter-1
ARID3A-GATAD2B	ENSG00000007541	16	619969	620319	619921	620441	HiC_interaction_with_promoter-1
FOXM1-GATAD2B	ENSG00000007968	1	23859704	23860224	23884816	23885336	HiC_interaction_with_promoter-1
FOXM1-GATAD2B	ENSG00000007968	1	23859704	23860224	23884616	23885136	HiC_interaction_with_promoter-1
FOXM1-GATAD2B	ENSG00000007968	1	23859968	23860488	23884816	23885336	HiC_interaction_with_promoter-1
FOXM1-GATAD2B	ENSG00000007968	1	23859968	23860488	23884616	23885136	HiC_interaction_with_promoter-1
FOXM1-PKNOX1	ENSG00000007968	1	23859767	23860191	23859704	23860224	HiC_interaction_with_promoter-1
FOXM1-PKNOX1	ENSG00000007968	1	23859767	23860191	23859968	23860488	HiC_interaction_with_promoter-1
FOXM1-PKNOX1	ENSG00000007968	1	23854820	23855126	23859704	23860224	HiC_interaction_with_promoter-1
FOXM1-PKNOX1	ENSG00000007968	1	23854820	23855126	23859968	23860488	HiC_interaction_with_promoter-1
FOXM1-GATAD2B	ENSG00000008083	6	15244914	15245248	15299742	15300262	HiC_interaction_with_promoter-1
ARID3A-GATAD2B	ENSG00000008083	6	15244914	15245248	15244944	15245294	HiC_interaction_with_promoter-1
GATAD2B-RELA	ENSG00000008083	6	15244914	15245248	15299688	15300072	HiC_interaction_with_promoter-1
JUND-ZNF24	ENSG00000008083	6	15244941	15245271	15299747	15300031	HiC_interaction_with_promoter-1
FOXM1-PKNOX1	ENSG00000008382	19	4334966	4335390	4369760	4370280	HiC_interaction_with_promoter-1
ATF2-RELB	ENSG00000008517	16	3124858	3125378	3124816	3125416	HiC_interaction_with_promoter-1
ATF2-RELB	ENSG00000008517	16	3124866	3125370	3124816	3125416	HiC_interaction_with_promoter-1
EP300-TAF1	ENSG00000008517	16	3124963	3125303	3124923	3125203	HiC_interaction_with_promoter-1
EP300-TAF1	ENSG00000008517	16	3124963	3125303	3124930	3125300	HiC_interaction_with_promoter-1
EP300-TAF1	ENSG00000008517	16	3124963	3125303	3124929	3125279	HiC_interaction_with_promoter-1
ATF2-RELB	ENSG00000008952	3	169649864	169650384	169649928	169650197	HiC_interaction_with_promoter-1
ATF2-RELB	ENSG00000008952	3	169649864	169650384	169649927	169650527	HiC_interaction_with_promoter-1
ATF2-RELB	ENSG00000008952	3	169649850	169650354	169649928	169650197	HiC_interaction_with_promoter-1
ATF2-RELB	ENSG00000008952	3	169649850	169650354	169649927	169650527	HiC_interaction_with_promoter-1
FOXM1-PKNOX1	ENSG00000008952	3	169649995	169650306	169649762	169650282	HiC_interaction_with_promoter-1
FOXM1-PKNOX1	ENSG00000008952	3	169649779	169650092	169649762	169650282	HiC_interaction_with_promoter-1
EP300-TAF1	ENSG00000008952	3	169649868	169650218	169724853	169725189	HiC_interaction_with_promoter-1
RELB-SPI1	ENSG00000008952	3	169649991	169650267	169649928	169650197	HiC_interaction_with_promoter-1
RELB-SPI1	ENSG00000008952	3	169649991	169650267	169649927	169650527	HiC_interaction_with_promoter-1
SRF-ZNF592	ENSG00000009413	6	111804817	111805101	111804948	111805148	HiC_interaction_with_promoter-1
SRF-ZNF592	ENSG00000009413	6	111804817	111805101	111804962	111805218	HiC_interaction_with_promoter-1
ATF2-ESRRA	ENSG00000009413	6	111744576	111745080	111804684	111805048	HiC_interaction_with_promoter-1
ASH2L-MAZ	ENSG00000009790	1	209924928	209925512	209924984	209925420	HiC_interaction_with_promoter-1
ASH2L-MAZ	ENSG00000009790	1	209924928	209925512	209924990	209925414	HiC_interaction_with_promoter-1
RELB-SPI1	ENSG00000009790	1	209924877	209925153	209924916	209925265	HiC_interaction_with_promoter-1
ATF2-RELB	ENSG00000009790	1	209924916	209925265	209974830	209975240	HiC_interaction_with_promoter-1
ASH2L-MAZ	ENSG00000010017	6	13574889	13575473	13709996	13710420	HiC_interaction_with_promoter-1
ASH2L-MAZ	ENSG00000010017	6	13574889	13575473	13710000	13710436	HiC_interaction_with_promoter-1
ATF2-RELB	ENSG00000010030	6	36349695	36350215	36349501	36350101	HiC_interaction_with_promoter-1
ATF2-RELB	ENSG00000010030	6	36349691	36350195	36349501	36350101	HiC_interaction_with_promoter-1
FOXM1-PKNOX1	ENSG00000010030	6	36349620	36350044	36349723	36350243	HiC_interaction_with_promoter-1
FOXM1-PKNOX1	ENSG00000010030	6	36329992	36330416	36349723	36350243	HiC_interaction_with_promoter-1
RELB-SPI1	ENSG00000010030	6	36349993	36350269	36349501	36350101	HiC_interaction_with_promoter-1
FOXK2-MTA2	ENSG00000010278	12	6339834	6340244	6339950	6340510	HiC_interaction_with_promoter-1
FOXK2-MTA2	ENSG00000010278	12	6339834	6340244	6339751	6340311	HiC_interaction_with_promoter-1
RELB-ZNF592	ENSG00000010278	12	6339888	6340172	6339724	6340324	HiC_interaction_with_promoter-1
MLLT1-RFX5	ENSG00000010278	12	6339770	6340346	6339980	6340316	HiC_interaction_with_promoter-1
MLLT1-RFX5	ENSG00000010278	12	6339770	6340346	6339977	6340313	HiC_interaction_with_promoter-1
RELB-STAT1	ENSG00000010278	12	6339971	6340335	6339724	6340324	HiC_interaction_with_promoter-1
CREM-RELA	ENSG00000010292	12	6579636	6580020	6579857	6580217	HiC_interaction_with_promoter-1
CREM-RELA	ENSG00000010292	12	6579636	6580020	6579656	6580016	HiC_interaction_with_promoter-1
MLLT1-RFX5	ENSG00000010292	12	6579848	6580184	6579585	6580161	HiC_interaction_with_promoter-1
RELB-STAT1	ENSG00000010292	12	6579877	6580241	6649575	6650175	HiC_interaction_with_promoter-1
GATAD2B-RELA	ENSG00000010626	12	6944866	6945386	6999950	7000334	HiC_interaction_with_promoter-1
GATAD2B-RELA	ENSG00000010626	12	6959879	6960399	6999950	7000334	HiC_interaction_with_promoter-1
ATF2-RELB	ENSG00000010704	6	26054990	26055494	26064758	26065358	HiC_interaction_with_promoter-1
ATF2-RELB	ENSG00000010704	6	26054992	26055512	26064758	26065358	HiC_interaction_with_promoter-1
RELB-STAT1	ENSG00000010704	6	26064854	26065218	26064758	26065358	HiC_interaction_with_promoter-1
RELB-ZNF592	ENSG00000010810	6	112074855	112075139	112194639	112195239	HiC_interaction_with_promoter-1
FOXM1-GATAD2B	ENSG00000011007	1	24054860	24055380	24054913	24055433	HiC_interaction_with_promoter-1
ARID3A-GATAD2B	ENSG00000011007	1	24054860	24055380	24104821	24105171	HiC_interaction_with_promoter-1
ATF2-NRF1	ENSG00000011007	1	24054909	24055429	24104767	24105017	HiC_interaction_with_promoter-1
RELB-ZNF592	ENSG00000011007	1	24055000	24055600	24104811	24105095	HiC_interaction_with_promoter-1
RELB-ZNF592	ENSG00000011007	1	24054973	24055258	24104811	24105095	HiC_interaction_with_promoter-1
RELB-SPI1	ENSG00000011007	1	24055000	24055600	24069761	24070037	HiC_interaction_with_promoter-1
RELB-SPI1	ENSG00000011007	1	24054973	24055258	24069761	24070037	HiC_interaction_with_promoter-1
ATF2-RELB	ENSG00000011007	1	24054909	24055429	24055000	24055600	HiC_interaction_with_promoter-1
ATF2-RELB	ENSG00000011007	1	24054909	24055429	24069741	24070341	HiC_interaction_with_promoter-1
ATF2-RELB	ENSG00000011007	1	24054909	24055429	24054973	24055258	HiC_interaction_with_promoter-1
FOXM1-GATAD2B	ENSG00000011243	19	15529632	15530152	15574516	15575036	HiC_interaction_with_promoter-1
FOXM1-GATAD2B	ENSG00000011243	19	15529632	15530152	15559965	15560485	HiC_interaction_with_promoter-1
FOXM1-GATAD2B	ENSG00000011243	19	15529853	15530373	15574516	15575036	HiC_interaction_with_promoter-1
FOXM1-PKNOX1	ENSG00000011243	19	15529632	15530152	15529530	15530265	HiC_interaction_with_promoter-1
FOXM1-PKNOX1	ENSG00000011243	19	15529853	15530373	15529530	15530265	HiC_interaction_with_promoter-1
GATAD2B-PBX3	ENSG00000011243	19	15529786	15530039	15574516	15575036	HiC_interaction_with_promoter-1
GATAD2B-PBX3	ENSG00000011243	19	15529786	15530039	15559965	15560485	HiC_interaction_with_promoter-1
GATAD2B-PBX3	ENSG00000011243	19	15529783	15530045	15574516	15575036	HiC_interaction_with_promoter-1
GATAD2B-PBX3	ENSG00000011243	19	15529783	15530045	15559965	15560485	HiC_interaction_with_promoter-1
MAZ-PBX3	ENSG00000011243	19	15529708	15530144	15529786	15530039	HiC_interaction_with_promoter-1
MAZ-PBX3	ENSG00000011243	19	15529708	15530144	15529783	15530045	HiC_interaction_with_promoter-1
MAZ-PBX3	ENSG00000011243	19	15529714	15530138	15529786	15530039	HiC_interaction_with_promoter-1
MAZ-PBX3	ENSG00000011243	19	15529714	15530138	15529783	15530045	HiC_interaction_with_promoter-1
MAZ-PBX3	ENSG00000011243	19	15529922	15530346	15529786	15530039	HiC_interaction_with_promoter-1
MAZ-PBX3	ENSG00000011243	19	15529922	15530346	15529783	15530045	HiC_interaction_with_promoter-1
ATF2-RELB	ENSG00000011243	19	15529740	15530340	15529792	15530296	HiC_interaction_with_promoter-1
ATF2-RELB	ENSG00000011243	19	15529740	15530340	15529992	15530496	HiC_interaction_with_promoter-1
ATF2-RELB	ENSG00000011243	19	15529740	15530340	15529808	15530328	HiC_interaction_with_promoter-1
RELB-STAT1	ENSG00000011243	19	15529740	15530340	15529945	15530309	HiC_interaction_with_promoter-1
ARID3A-GATAD2B	ENSG00000011332	19	38714752	38715272	38714754	38715104	HiC_interaction_with_promoter-1
ARID3A-GATAD2B	ENSG00000011332	19	38704593	38705113	38714754	38715104	HiC_interaction_with_promoter-1
EP300-PBX3	ENSG00000011332	19	38704908	38705268	38714932	38715148	HiC_interaction_with_promoter-1
EP300-PBX3	ENSG00000011332	19	38704908	38705268	38714924	38715144	HiC_interaction_with_promoter-1
EP300-PBX3	ENSG00000011332	19	38714987	38715267	38714932	38715148	HiC_interaction_with_promoter-1
EP300-PBX3	ENSG00000011332	19	38714987	38715267	38714924	38715144	HiC_interaction_with_promoter-1
EP300-PBX3	ENSG00000011332	19	38704656	38705016	38714932	38715148	HiC_interaction_with_promoter-1
EP300-PBX3	ENSG00000011332	19	38704656	38705016	38714924	38715144	HiC_interaction_with_promoter-1
EP300-PBX3	ENSG00000011332	19	38714941	38715301	38714932	38715148	HiC_interaction_with_promoter-1
EP300-PBX3	ENSG00000011332	19	38714941	38715301	38714924	38715144	HiC_interaction_with_promoter-1
MAZ-PBX3	ENSG00000011332	19	38714830	38715266	38714932	38715148	HiC_interaction_with_promoter-1
MAZ-PBX3	ENSG00000011332	19	38714830	38715266	38714924	38715144	HiC_interaction_with_promoter-1
MAZ-PBX3	ENSG00000011332	19	38714843	38715267	38714932	38715148	HiC_interaction_with_promoter-1
MAZ-PBX3	ENSG00000011332	19	38714843	38715267	38714924	38715144	HiC_interaction_with_promoter-1
GATAD2B-PBX3	ENSG00000011332	19	38714752	38715272	38714932	38715148	HiC_interaction_with_promoter-1
GATAD2B-PBX3	ENSG00000011332	19	38714752	38715272	38714924	38715144	HiC_interaction_with_promoter-1
GATAD2B-PBX3	ENSG00000011332	19	38704593	38705113	38714932	38715148	HiC_interaction_with_promoter-1
GATAD2B-PBX3	ENSG00000011332	19	38704593	38705113	38714924	38715144	HiC_interaction_with_promoter-1
ATF2-NRF1	ENSG00000011376	3	45429865	45430115	45429803	45430307	HiC_interaction_with_promoter-1
ATF2-NRF1	ENSG00000011376	3	45429865	45430115	45429809	45430329	HiC_interaction_with_promoter-1
ATF2-NRF1	ENSG00000011376	3	45429863	45430113	45429803	45430307	HiC_interaction_with_promoter-1
ATF2-NRF1	ENSG00000011376	3	45429863	45430113	45429809	45430329	HiC_interaction_with_promoter-1
ATF2-RELB	ENSG00000011376	3	45429933	45430369	45429803	45430307	HiC_interaction_with_promoter-1
ATF2-RELB	ENSG00000011376	3	45429933	45430369	45429809	45430329	HiC_interaction_with_promoter-1
EP300-PBX3	ENSG00000011376	3	45429952	45430222	45429944	45430160	HiC_interaction_with_promoter-1
EP300-PBX3	ENSG00000011376	3	45429939	45430219	45429944	45430160	HiC_interaction_with_promoter-1
MAZ-PBX3	ENSG00000011376	3	45429805	45430241	45429944	45430160	HiC_interaction_with_promoter-1
MAZ-PBX3	ENSG00000011376	3	45429817	45430241	45429944	45430160	HiC_interaction_with_promoter-1
FOXM1-PKNOX1	ENSG00000011376	3	45429824	45430344	45429844	45430268	HiC_interaction_with_promoter-1
FOXM1-PKNOX1	ENSG00000011376	3	45429824	45430344	45634953	45635377	HiC_interaction_with_promoter-1
ASH2L-MAZ	ENSG00000011376	3	45429807	45430391	45429805	45430241	HiC_interaction_with_promoter-1
ASH2L-MAZ	ENSG00000011376	3	45429807	45430391	45429817	45430241	HiC_interaction_with_promoter-1
ATF2-ESRRA	ENSG00000011376	3	45429901	45430265	45429803	45430307	HiC_interaction_with_promoter-1
ATF2-ESRRA	ENSG00000011376	3	45429901	45430265	45429809	45430329	HiC_interaction_with_promoter-1
EP300-TAF1	ENSG00000011376	3	45429938	45430274	45429952	45430222	HiC_interaction_with_promoter-1
EP300-TAF1	ENSG00000011376	3	45429938	45430274	45429939	45430219	HiC_interaction_with_promoter-1
EP300-TAF1	ENSG00000011376	3	45429934	45430274	45429952	45430222	HiC_interaction_with_promoter-1
EP300-TAF1	ENSG00000011376	3	45429934	45430274	45429939	45430219	HiC_interaction_with_promoter-1
BCL3-HDAC2	ENSG00000011376	3	45429899	45430255	45634780	45635296	HiC_interaction_with_promoter-1
BCL3-HDAC2	ENSG00000011376	3	45429905	45430249	45634780	45635296	HiC_interaction_with_promoter-1
FOXM1-GATAD2B	ENSG00000011478	19	46184664	46185184	46184892	46185412	HiC_interaction_with_promoter-1
FOXM1-GATAD2B	ENSG00000011478	19	46184664	46185184	46234583	46235103	HiC_interaction_with_promoter-1
FOXM1-GATAD2B	ENSG00000011478	19	46184664	46185184	46184692	46185212	HiC_interaction_with_promoter-1
ARID3A-GATAD2B	ENSG00000011478	19	46184783	46185133	46184892	46185412	HiC_interaction_with_promoter-1
ARID3A-GATAD2B	ENSG00000011478	19	46184783	46185133	46234583	46235103	HiC_interaction_with_promoter-1
ARID3A-GATAD2B	ENSG00000011478	19	46184783	46185133	46184692	46185212	HiC_interaction_with_promoter-1
FOXM1-GATAD2B	ENSG00000011590	19	36184596	36185116	36184603	36185123	HiC_interaction_with_promoter-1
FOXM1-GATAD2B	ENSG00000011590	19	36184596	36185116	36184814	36185334	HiC_interaction_with_promoter-1
ATF2-RELB	ENSG00000011590	19	36164436	36165036	36184606	36185110	HiC_interaction_with_promoter-1
SRF-ZNF592	ENSG00000011590	19	36184720	36185004	36184824	36185024	HiC_interaction_with_promoter-1
RELB-ZNF592	ENSG00000011590	19	36164436	36165036	36184720	36185004	HiC_interaction_with_promoter-1
FOXM1-PKNOX1	ENSG00000011590	19	36184975	36185174	36184596	36185116	HiC_interaction_with_promoter-1
ATF2-ESRRA	ENSG00000011590	19	36184606	36185110	36184700	36185064	HiC_interaction_with_promoter-1
JUND-RELB	ENSG00000012124	19	35819730	35820014	35819725	35820090	HiC_interaction_with_promoter-1
GATAD2B-RELA	ENSG00000012124	19	35809882	35810402	35814999	35815383	HiC_interaction_with_promoter-1
FOXM1-GATAD2B	ENSG00000012171	3	50264723	50265243	50264900	50265032	HiC_interaction_with_promoter-1
FOXM1-GATAD2B	ENSG00000012171	3	50264929	50265449	50264900	50265032	HiC_interaction_with_promoter-1
ATF2-NRF1	ENSG00000012171	3	50264777	50265281	50329849	50330099	HiC_interaction_with_promoter-1
ATF2-NRF1	ENSG00000012171	3	50264769	50265289	50329849	50330099	HiC_interaction_with_promoter-1
ATF2-RELB	ENSG00000012171	3	50264818	50265418	50264777	50265281	HiC_interaction_with_promoter-1
ATF2-RELB	ENSG00000012171	3	50264818	50265418	50264769	50265289	HiC_interaction_with_promoter-1
SRF-ZNF592	ENSG00000012171	3	50264781	50265065	50264934	50265158	HiC_interaction_with_promoter-1
SRF-ZNF592	ENSG00000012171	3	50264781	50265065	50329834	50330058	HiC_interaction_with_promoter-1
SRF-ZNF592	ENSG00000012171	3	50264781	50265065	50329826	50330026	HiC_interaction_with_promoter-1
SRF-ZNF592	ENSG00000012171	3	50264781	50265065	50264918	50265118	HiC_interaction_with_promoter-1
ARID3A-GATAD2B	ENSG00000012171	3	50264723	50265243	50329810	50330160	HiC_interaction_with_promoter-1
ARID3A-GATAD2B	ENSG00000012171	3	50264929	50265449	50329810	50330160	HiC_interaction_with_promoter-1
RELB-ZNF592	ENSG00000012171	3	50264781	50265065	50264818	50265418	HiC_interaction_with_promoter-1
RELB-ZNF592	ENSG00000012171	3	50264781	50265065	50274986	50275586	HiC_interaction_with_promoter-1
FOXM1-PKNOX1	ENSG00000012171	3	50264900	50265032	50329753	50330177	HiC_interaction_with_promoter-1
RELB-STAT1	ENSG00000012171	3	50264818	50265418	50329801	50330165	HiC_interaction_with_promoter-1
RELB-STAT1	ENSG00000012171	3	50264818	50265418	50264907	50265271	HiC_interaction_with_promoter-1
RELB-STAT1	ENSG00000012171	3	50274986	50275586	50329801	50330165	HiC_interaction_with_promoter-1
RELB-SPI1	ENSG00000012660	6	53109783	53110059	53199959	53200382	HiC_interaction_with_promoter-1
RELB-SPI1	ENSG00000012660	6	53109783	53110059	53149526	53150126	HiC_interaction_with_promoter-1
GATAD2B-RELA	ENSG00000012779	10	45869829	45870349	45914923	45915307	HiC_interaction_with_promoter-1
ATF2-RELB	ENSG00000012822	12	54144805	54145025	54159697	54160107	HiC_interaction_with_promoter-1
GATAD2B-PBX3	ENSG00000013725	11	60719592	60720112	60719989	60720209	HiC_interaction_with_promoter-1
GATAD2B-PBX3	ENSG00000013725	11	60719592	60720112	60719991	60720207	HiC_interaction_with_promoter-1
ATF2-RELB	ENSG00000013810	4	1714488	1715008	1714433	1715033	HiC_interaction_with_promoter-1
ATF2-RELB	ENSG00000013810	4	1714488	1715008	1714646	1715246	HiC_interaction_with_promoter-1
RELB-STAT1	ENSG00000013810	4	1714433	1715033	1724727	1725091	HiC_interaction_with_promoter-1
RELB-STAT1	ENSG00000013810	4	1714646	1715246	1724727	1725091	HiC_interaction_with_promoter-1
FOXM1-GATAD2B	ENSG00000014123	6	96969526	96970046	96969682	96970202	HiC_interaction_with_promoter-1
ARID3A-GATAD2B	ENSG00000014123	6	96969526	96970046	96969799	96970149	HiC_interaction_with_promoter-1
FOXM1-GATAD2B	ENSG00000015133	14	91719842	91720153	91839924	91840245	HiC_interaction_with_promoter-1
FOXM1-GATAD2B	ENSG00000015133	14	91719842	91720153	91799918	91800438	HiC_interaction_with_promoter-1
ASH2L-JUND	ENSG00000015133	14	91839941	91840525	91839949	91840233	HiC_interaction_with_promoter-1
ASH2L-JUND	ENSG00000015133	14	91839941	91840525	91839911	91840221	HiC_interaction_with_promoter-1
JUND-RELB	ENSG00000015133	14	91839949	91840233	91854852	91855452	HiC_interaction_with_promoter-1
JUND-RELB	ENSG00000015133	14	91839949	91840233	91884939	91885539	HiC_interaction_with_promoter-1
JUND-RELB	ENSG00000015133	14	91839949	91840233	91839949	91840223	HiC_interaction_with_promoter-1
JUND-RELB	ENSG00000015133	14	91839911	91840221	91854852	91855452	HiC_interaction_with_promoter-1
JUND-RELB	ENSG00000015133	14	91839911	91840221	91884939	91885539	HiC_interaction_with_promoter-1
JUND-RELB	ENSG00000015133	14	91839911	91840221	91839949	91840223	HiC_interaction_with_promoter-1
ESRRA-JUND	ENSG00000015133	14	91839949	91840233	91839960	91840324	HiC_interaction_with_promoter-1
ESRRA-JUND	ENSG00000015133	14	91839911	91840221	91839960	91840324	HiC_interaction_with_promoter-1
ATF2-RELB	ENSG00000015133	14	91799949	91800549	91839949	91840224	HiC_interaction_with_promoter-1
ATF2-RELB	ENSG00000015133	14	91799949	91800549	91839967	91840204	HiC_interaction_with_promoter-1
ATF2-RELB	ENSG00000015133	14	91719415	91720015	91839949	91840224	HiC_interaction_with_promoter-1
ATF2-RELB	ENSG00000015133	14	91719415	91720015	91839967	91840204	HiC_interaction_with_promoter-1
ATF2-RELB	ENSG00000015133	14	91839949	91840223	91839949	91840224	HiC_interaction_with_promoter-1
ATF2-RELB	ENSG00000015133	14	91839949	91840223	91839967	91840204	HiC_interaction_with_promoter-1
ARID3A-GATAD2B	ENSG00000015133	14	91719842	91720153	91839956	91840306	HiC_interaction_with_promoter-1
GATAD2B-RELA	ENSG00000015133	14	91839894	91840278	91854925	91855445	HiC_interaction_with_promoter-1
GATAD2B-RELA	ENSG00000015133	14	91839894	91840278	91884493	91885013	HiC_interaction_with_promoter-1
JUND-ZNF24	ENSG00000015133	14	91839949	91840233	91839963	91840293	HiC_interaction_with_promoter-1
JUND-ZNF24	ENSG00000015133	14	91839911	91840221	91839963	91840293	HiC_interaction_with_promoter-1
FOXM1-PKNOX1	ENSG00000015133	14	91839830	91840254	91839924	91840245	HiC_interaction_with_promoter-1
ASH2L-MAZ	ENSG00000015133	14	91839941	91840525	91839789	91840225	HiC_interaction_with_promoter-1
ASH2L-MAZ	ENSG00000015133	14	91839941	91840525	91839807	91840231	HiC_interaction_with_promoter-1
ATF2-ESRRA	ENSG00000015133	14	91839960	91840324	91839949	91840224	HiC_interaction_with_promoter-1
ATF2-ESRRA	ENSG00000015133	14	91839960	91840324	91839967	91840204	HiC_interaction_with_promoter-1
EP300-TAF1	ENSG00000015133	14	91839684	91840020	91839910	91840280	HiC_interaction_with_promoter-1
EP300-TAF1	ENSG00000015133	14	91839684	91840020	91839916	91840272	HiC_interaction_with_promoter-1
EP300-TAF1	ENSG00000015133	14	91839684	91840020	91839926	91840276	HiC_interaction_with_promoter-1
EP300-TAF1	ENSG00000015133	14	91839684	91840020	91839910	91840270	HiC_interaction_with_promoter-1
EP300-TAF1	ENSG00000015133	14	91839684	91840020	91839969	91840249	HiC_interaction_with_promoter-1
EP300-TAF1	ENSG00000015133	14	91839684	91840020	91839976	91840246	HiC_interaction_with_promoter-1
RELB-SPI1	ENSG00000015133	14	91799949	91800549	91839949	91840442	HiC_interaction_with_promoter-1
RELB-SPI1	ENSG00000015133	14	91719415	91720015	91839949	91840442	HiC_interaction_with_promoter-1
RELB-SPI1	ENSG00000015133	14	91839949	91840223	91839949	91840442	HiC_interaction_with_promoter-1
ATF2-JUND	ENSG00000015133	14	91839949	91840233	91839949	91840224	HiC_interaction_with_promoter-1
ATF2-JUND	ENSG00000015133	14	91839949	91840233	91839967	91840204	HiC_interaction_with_promoter-1
ATF2-JUND	ENSG00000015133	14	91839911	91840221	91839949	91840224	HiC_interaction_with_promoter-1
ATF2-JUND	ENSG00000015133	14	91839911	91840221	91839967	91840204	HiC_interaction_with_promoter-1
FOXM1-GATAD2B	ENSG00000015475	22	18259974	18260494	18264527	18265047	HiC_interaction_with_promoter-1
FOXM1-GATAD2B	ENSG00000015475	22	18259974	18260494	18259946	18260466	HiC_interaction_with_promoter-1
FOXM1-PKNOX1	ENSG00000015475	22	18259974	18260494	18259823	18260247	HiC_interaction_with_promoter-1
ASH2L-MAZ	ENSG00000015475	22	18259822	18260406	18259887	18260323	HiC_interaction_with_promoter-1
ASH2L-MAZ	ENSG00000015475	22	18259822	18260406	18259893	18260317	HiC_interaction_with_promoter-1
RELB-SPI1	ENSG00000015475	22	18259980	18260475	18259999	18260087	HiC_interaction_with_promoter-1
FOXM1-GATAD2B	ENSG00000016864	3	52719962	52720482	52719972	52720492	HiC_interaction_with_promoter-1
JUND-RELB	ENSG00000016864	3	52719867	52720151	52739988	52740588	HiC_interaction_with_promoter-1
JUND-RELB	ENSG00000016864	3	52719867	52720151	52719945	52720545	HiC_interaction_with_promoter-1
JUND-RELB	ENSG00000016864	3	52719867	52720151	52744563	52745163	HiC_interaction_with_promoter-1
CREM-RELA	ENSG00000016864	3	52719805	52720189	52754908	52755268	HiC_interaction_with_promoter-1
CREM-RELA	ENSG00000016864	3	52719805	52720189	52719964	52720075	HiC_interaction_with_promoter-1
CREM-RELA	ENSG00000016864	3	52719805	52720189	52739940	52740300	HiC_interaction_with_promoter-1
GATAD2B-RELA	ENSG00000016864	3	52719805	52720189	52739852	52740372	HiC_interaction_with_promoter-1
GATAD2B-RELA	ENSG00000016864	3	52719805	52720189	52739650	52740170	HiC_interaction_with_promoter-1
GATAD2B-RELA	ENSG00000016864	3	52719805	52720189	52719962	52720482	HiC_interaction_with_promoter-1
FOXM1-PKNOX1	ENSG00000016864	3	52719972	52720492	52739907	52740331	HiC_interaction_with_promoter-1
FOXM1-PKNOX1	ENSG00000016864	3	52719972	52720492	52719894	52720135	HiC_interaction_with_promoter-1
RELB-SPI1	ENSG00000016864	3	52719945	52720545	52739951	52740227	HiC_interaction_with_promoter-1
RELB-STAT1	ENSG00000016864	3	52719903	52720267	52739988	52740588	HiC_interaction_with_promoter-1
RELB-STAT1	ENSG00000016864	3	52719903	52720267	52719945	52720545	HiC_interaction_with_promoter-1
RELB-STAT1	ENSG00000016864	3	52719903	52720267	52744563	52745163	HiC_interaction_with_promoter-1
RELB-STAT1	ENSG00000016864	3	52739662	52740026	52744563	52745163	HiC_interaction_with_promoter-1
RELB-STAT1	ENSG00000016864	3	52739875	52740239	52744563	52745163	HiC_interaction_with_promoter-1
RELB-SPI1	ENSG00000017797	18	9474906	9475247	9494855	9495131	HiC_interaction_with_promoter-1
RELB-SPI1	ENSG00000017797	18	9474995	9475595	9494855	9495131	HiC_interaction_with_promoter-1
RELB-STAT1	ENSG00000017797	18	9474906	9475247	9474927	9475291	HiC_interaction_with_promoter-1
RELB-STAT1	ENSG00000017797	18	9474995	9475595	9474927	9475291	HiC_interaction_with_promoter-1
RELB-STAT1	ENSG00000018189	4	71579737	71580101	71704420	71705020	HiC_interaction_with_promoter-1
RELB-STAT1	ENSG00000018189	4	71579737	71580101	71579447	71580047	HiC_interaction_with_promoter-1
RELB-STAT1	ENSG00000018189	4	71579938	71580302	71704420	71705020	HiC_interaction_with_promoter-1
RELB-STAT1	ENSG00000018189	4	71579938	71580302	71579447	71580047	HiC_interaction_with_promoter-1
GATAD2B-PBX3	ENSG00000019582	5	149784787	149785003	149789492	149790012	HiC_interaction_with_promoter-1
ARID3A-GATAD2B	ENSG00000019582	5	149789492	149790012	149789732	149790082	HiC_interaction_with_promoter-1
ARID3A-GATAD2B	ENSG00000019582	5	149789492	149790012	149789952	149790302	HiC_interaction_with_promoter-1
RELB-SPI1	ENSG00000020181	8	37619684	37620140	37659797	37660073	HiC_interaction_with_promoter-1
RELB-SPI1	ENSG00000020181	8	37619993	37620161	37659797	37660073	HiC_interaction_with_promoter-1
CREM-RELA	ENSG00000021574	2	32264785	32265169	32264802	32265162	HiC_interaction_with_promoter-1
FOXM1-PKNOX1	ENSG00000021574	2	32264761	32265281	32264897	32265321	HiC_interaction_with_promoter-1
FOXM1-PKNOX1	ENSG00000021574	2	32264761	32265281	32264767	32265031	HiC_interaction_with_promoter-1
RELB-STAT1	ENSG00000021574	2	32264740	32265340	32264863	32265227	HiC_interaction_with_promoter-1
GATAD2B-PBX3	ENSG00000023171	11	123349988	123350508	123389830	123390046	HiC_interaction_with_promoter-1
GATAD2B-PBX3	ENSG00000023171	11	123349988	123350508	123389825	123390045	HiC_interaction_with_promoter-1
EP300-PBX3	ENSG00000023171	11	123349923	123350283	123389830	123390046	HiC_interaction_with_promoter-1
EP300-PBX3	ENSG00000023171	11	123349923	123350283	123389825	123390045	HiC_interaction_with_promoter-1
EP300-PBX3	ENSG00000023171	11	123349840	123350190	123389830	123390046	HiC_interaction_with_promoter-1
EP300-PBX3	ENSG00000023171	11	123349840	123350190	123389825	123390045	HiC_interaction_with_promoter-1
ATF2-RELB	ENSG00000023330	3	52259535	52260135	52259851	52260355	HiC_interaction_with_promoter-1
ATF2-RELB	ENSG00000023445	11	102164479	102165079	102164679	102165199	HiC_interaction_with_promoter-1
GATAD2B-PBX3	ENSG00000023734	12	16034853	16035073	16034792	16035312	HiC_interaction_with_promoter-1
RELB-STAT1	ENSG00000023734	12	16034759	16035359	16034793	16035157	HiC_interaction_with_promoter-1
RELB-STAT1	ENSG00000023734	12	16034759	16035359	16034794	16035158	HiC_interaction_with_promoter-1
RELB-STAT1	ENSG00000023734	12	16034759	16035359	16034995	16035359	HiC_interaction_with_promoter-1
FOXM1-GATAD2B	ENSG00000023909	1	94374900	94375327	94374973	94375493	HiC_interaction_with_promoter-1
ARID3A-GATAD2B	ENSG00000023909	1	94374900	94375327	94374999	94375349	HiC_interaction_with_promoter-1
ASH2L-MAZ	ENSG00000023909	1	94344636	94345060	94374726	94375310	HiC_interaction_with_promoter-1
ASH2L-MAZ	ENSG00000023909	1	94344624	94345060	94374726	94375310	HiC_interaction_with_promoter-1
RELB-STAT1	ENSG00000024862	6	139094670	139095270	139094710	139095074	HiC_interaction_with_promoter-1
ARID3A-GATAD2B	ENSG00000025293	20	34359971	34360321	34359988	34360213	HiC_interaction_with_promoter-1
ARID3A-GATAD2B	ENSG00000025293	20	34329787	34330137	34359988	34360213	HiC_interaction_with_promoter-1
ARID3A-GATAD2B	ENSG00000025293	20	34329787	34330137	34329731	34330251	HiC_interaction_with_promoter-1
ARID3A-GATAD2B	ENSG00000025708	22	50969821	50970171	50969909	50970235	HiC_interaction_with_promoter-1
ARID3A-GATAD2B	ENSG00000026025	10	17269555	17270075	17269770	17270120	HiC_interaction_with_promoter-1
ATF2-RELB	ENSG00000026025	10	17269568	17270088	17269673	17270273	HiC_interaction_with_promoter-1
ATF2-RELB	ENSG00000026025	10	17269539	17270043	17269673	17270273	HiC_interaction_with_promoter-1
RELB-STAT1	ENSG00000026025	10	17269659	17270023	17269673	17270273	HiC_interaction_with_promoter-1
ASH2L-MAZ	ENSG00000026297	6	167369967	167370391	167369506	167370090	HiC_interaction_with_promoter-1
ASH2L-MAZ	ENSG00000026297	6	167364670	167365106	167369506	167370090	HiC_interaction_with_promoter-1
EP300-TAF1	ENSG00000026297	6	167364687	167365047	167369901	167370241	HiC_interaction_with_promoter-1
EP300-TAF1	ENSG00000026297	6	167364687	167365047	167369912	167370248	HiC_interaction_with_promoter-1
EP300-TAF1	ENSG00000026297	6	167364666	167365036	167369901	167370241	HiC_interaction_with_promoter-1
EP300-TAF1	ENSG00000026297	6	167364666	167365036	167369912	167370248	HiC_interaction_with_promoter-1
BCL3-HDAC2	ENSG00000026297	6	167364737	167365253	167369955	167370311	HiC_interaction_with_promoter-1
ATF2-RELB	ENSG00000026652	6	161694955	161695555	161694914	161695434	HiC_interaction_with_promoter-1
ATF2-RELB	ENSG00000026652	6	161694955	161695555	161694922	161695426	HiC_interaction_with_promoter-1
ATF2-RELB	ENSG00000027075	14	61839805	61840309	61854813	61855398	HiC_interaction_with_promoter-1
ATF2-RELB	ENSG00000027075	14	61839805	61840309	61969840	61970440	HiC_interaction_with_promoter-1
ATF2-RELB	ENSG00000027075	14	61839805	61840309	61869910	61870510	HiC_interaction_with_promoter-1
ATF2-RELB	ENSG00000027075	14	61839805	61840309	61854813	61855396	HiC_interaction_with_promoter-1
ATF2-RELB	ENSG00000027075	14	61809973	61810477	61854813	61855398	HiC_interaction_with_promoter-1
ATF2-RELB	ENSG00000027075	14	61809973	61810477	61969840	61970440	HiC_interaction_with_promoter-1
ATF2-RELB	ENSG00000027075	14	61809973	61810477	61869910	61870510	HiC_interaction_with_promoter-1
ATF2-RELB	ENSG00000027075	14	61809973	61810477	61854813	61855396	HiC_interaction_with_promoter-1
ATF2-RELB	ENSG00000027075	14	61839969	61840267	61854813	61855398	HiC_interaction_with_promoter-1
ATF2-RELB	ENSG00000027075	14	61839969	61840267	61969840	61970440	HiC_interaction_with_promoter-1
ATF2-RELB	ENSG00000027075	14	61839969	61840267	61869910	61870510	HiC_interaction_with_promoter-1
ATF2-RELB	ENSG00000027075	14	61839969	61840267	61854813	61855396	HiC_interaction_with_promoter-1
ATF2-RELB	ENSG00000027697	6	137539853	137540357	137539633	137540233	HiC_interaction_with_promoter-1
ATF2-RELB	ENSG00000027697	6	137539546	137540066	137539633	137540233	HiC_interaction_with_promoter-1
ATF2-RELB	ENSG00000027697	6	137539594	137540098	137539633	137540233	HiC_interaction_with_promoter-1
JUND-RELB	ENSG00000028116	2	58119938	58120442	58119971	58120255	HiC_interaction_with_promoter-1
ATF2-RELB	ENSG00000028116	2	58119938	58120442	58119881	58120385	HiC_interaction_with_promoter-1
ATF2-RELB	ENSG00000028116	2	58119938	58120442	58119917	58120437	HiC_interaction_with_promoter-1
ATF2-JUND	ENSG00000028116	2	58119971	58120255	58119881	58120385	HiC_interaction_with_promoter-1
ATF2-JUND	ENSG00000028116	2	58119971	58120255	58119917	58120437	HiC_interaction_with_promoter-1
FOXM1-GATAD2B	ENSG00000028137	1	12184771	12185291	12289946	12290325	HiC_interaction_with_promoter-1
ATF2-RELB	ENSG00000029364	14	69819782	69820382	69864853	69865373	HiC_interaction_with_promoter-1
ATF2-RELB	ENSG00000029364	14	69819782	69820382	69864863	69865367	HiC_interaction_with_promoter-1
MLLT1-RFX5	ENSG00000029364	14	69864957	69865431	69864892	69865228	HiC_interaction_with_promoter-1
JUND-RELB	ENSG00000029534	8	41649785	41650334	41649958	41650242	HiC_interaction_with_promoter-1
JUND-RELB	ENSG00000029534	8	41649785	41650319	41649958	41650242	HiC_interaction_with_promoter-1
ATF2-RELB	ENSG00000029534	8	41649785	41650334	41649844	41650364	HiC_interaction_with_promoter-1
ATF2-RELB	ENSG00000029534	8	41649785	41650334	41649855	41650359	HiC_interaction_with_promoter-1
ATF2-RELB	ENSG00000029534	8	41649785	41650319	41649844	41650364	HiC_interaction_with_promoter-1
ATF2-RELB	ENSG00000029534	8	41649785	41650319	41649855	41650359	HiC_interaction_with_promoter-1
FOXK2-MTA2	ENSG00000029534	8	41649709	41650325	41649947	41650357	HiC_interaction_with_promoter-1
RELB-SPI1	ENSG00000029534	8	41649938	41650216	41649785	41650334	HiC_interaction_with_promoter-1
RELB-SPI1	ENSG00000029534	8	41649938	41650216	41649785	41650319	HiC_interaction_with_promoter-1
ATF2-JUND	ENSG00000029534	8	41649958	41650242	41649844	41650364	HiC_interaction_with_promoter-1
ATF2-JUND	ENSG00000029534	8	41649958	41650242	41649855	41650359	HiC_interaction_with_promoter-1
ASH2L-JUND	ENSG00000030066	11	47869850	47870134	47869853	47870437	HiC_interaction_with_promoter-1
JUND-RELB	ENSG00000030066	11	47869526	47870028	47869850	47870134	HiC_interaction_with_promoter-1
ASH2L-MAZ	ENSG00000030066	11	47869731	47870167	47869853	47870437	HiC_interaction_with_promoter-1
ASH2L-MAZ	ENSG00000030066	11	47869740	47870164	47869853	47870437	HiC_interaction_with_promoter-1
EP300-TAF1	ENSG00000030066	11	47869903	47870243	47869813	47870183	HiC_interaction_with_promoter-1
EP300-TAF1	ENSG00000030066	11	47869903	47870243	47869818	47870178	HiC_interaction_with_promoter-1
EP300-TAF1	ENSG00000030066	11	47869910	47870246	47869813	47870183	HiC_interaction_with_promoter-1
EP300-TAF1	ENSG00000030066	11	47869910	47870246	47869818	47870178	HiC_interaction_with_promoter-1
ATF2-JUND	ENSG00000030066	11	47869613	47870117	47869850	47870134	HiC_interaction_with_promoter-1
ATF2-RELB	ENSG00000030066	11	47869613	47870117	47869526	47870028	HiC_interaction_with_promoter-1
MLLT1-RFX5	ENSG00000030066	11	47869476	47870052	47869781	47870117	HiC_interaction_with_promoter-1
RELB-STAT1	ENSG00000030066	11	47869526	47870028	47869698	47870062	HiC_interaction_with_promoter-1
ATF2-RELB	ENSG00000030110	6	33524607	33525111	33544548	33545148	HiC_interaction_with_promoter-1
ATF2-RELB	ENSG00000030110	6	33524567	33525087	33544548	33545148	HiC_interaction_with_promoter-1
ATF2-RELB	ENSG00000031081	3	119014789	119015389	119114820	119115219	HiC_interaction_with_promoter-1
ATF2-RELB	ENSG00000031081	3	119014789	119015389	119119826	119120346	HiC_interaction_with_promoter-1
ATF2-RELB	ENSG00000031081	3	119014789	119015389	119114837	119115208	HiC_interaction_with_promoter-1
RELB-ZNF592	ENSG00000031081	3	119014789	119015389	119114790	119115074	HiC_interaction_with_promoter-1
RELB-SPI1	ENSG00000031081	3	119014789	119015389	119014930	119015111	HiC_interaction_with_promoter-1
ARID3A-GATAD2B	ENSG00000033030	12	122984790	122985310	122984731	122985081	HiC_interaction_with_promoter-1
ARID3A-GATAD2B	ENSG00000033030	12	122984790	122985310	122984958	122985308	HiC_interaction_with_promoter-1
ASH2L-MAZ	ENSG00000033030	12	122984620	122985044	122984852	122985436	HiC_interaction_with_promoter-1
CREM-RELA	ENSG00000033627	17	40664807	40665191	40664783	40665143	HiC_interaction_with_promoter-1
GATAD2B-RELA	ENSG00000033627	17	40664513	40665033	40664807	40665191	HiC_interaction_with_promoter-1
GATAD2B-RELA	ENSG00000033627	17	40609531	40610051	40664807	40665191	HiC_interaction_with_promoter-1
ATF2-RELB	ENSG00000033867	3	27509789	27510199	27524517	27525117	HiC_interaction_with_promoter-1
ASH2L-MAZ	ENSG00000034713	16	75589958	75590394	75589651	75590235	HiC_interaction_with_promoter-1
RELB-STAT1	ENSG00000034713	16	75589892	75590256	75604651	75605251	HiC_interaction_with_promoter-1
KDM5A-SUZ12	ENSG00000035115	2	264786	265362	289853	290237	HiC_interaction_with_promoter-1
KDM5A-SUZ12	ENSG00000035115	2	264786	265362	289647	290031	HiC_interaction_with_promoter-1
ARID3A-GATAD2B	ENSG00000035115	2	264787	265307	264900	265250	HiC_interaction_with_promoter-1
RELB-ZNF592	ENSG00000035115	2	264891	265294	264940	265224	HiC_interaction_with_promoter-1
MLLT1-RFX5	ENSG00000035664	15	64184960	64185378	64359712	64360048	HiC_interaction_with_promoter-1
JUND-RELB	ENSG00000035681	8	59544642	59545001	59554898	59555182	HiC_interaction_with_promoter-1
JUND-RELB	ENSG00000035681	8	59544642	59545001	59554903	59555213	HiC_interaction_with_promoter-1
ATF2-RELB	ENSG00000036054	3	99979594	99980098	99979721	99980110	HiC_interaction_with_promoter-1
ATF2-RELB	ENSG00000036054	3	99979558	99980078	99979721	99980110	HiC_interaction_with_promoter-1
RELB-SPI1	ENSG00000037042	17	40799939	40800215	40829582	40830182	HiC_interaction_with_promoter-1
FOXM1-GATAD2B	ENSG00000037757	19	13874871	13875391	13874838	13875358	HiC_interaction_with_promoter-1
ASH2L-JUND	ENSG00000038382	5	14144858	14145442	14264775	14265059	HiC_interaction_with_promoter-1
JUND-RELB	ENSG00000038382	5	14149467	14150067	14264775	14265059	HiC_interaction_with_promoter-1
ATF2-RELB	ENSG00000038382	5	14149467	14150067	14264799	14265042	HiC_interaction_with_promoter-1
ATF2-RELB	ENSG00000038382	5	14149467	14150067	14264654	14265171	HiC_interaction_with_promoter-1
ATF2-RELB	ENSG00000038382	5	14149467	14150067	14264790	14265060	HiC_interaction_with_promoter-1
ARID3A-GATAD2B	ENSG00000038382	5	14144790	14145140	14144904	14145424	HiC_interaction_with_promoter-1
ARID3A-GATAD2B	ENSG00000038382	5	14144790	14145140	14144770	14145118	HiC_interaction_with_promoter-1
RELB-ZNF592	ENSG00000038382	5	14144826	14145110	14264660	14265260	HiC_interaction_with_promoter-1
RELB-ZNF592	ENSG00000038382	5	14144826	14145110	14149467	14150067	HiC_interaction_with_promoter-1
RELB-ZNF592	ENSG00000038382	5	14144826	14145110	14204831	14205431	HiC_interaction_with_promoter-1
ASH2L-MAZ	ENSG00000038382	5	14144858	14145442	14264908	14265332	HiC_interaction_with_promoter-1
ASH2L-MAZ	ENSG00000038382	5	14144858	14145442	14169851	14170275	HiC_interaction_with_promoter-1
EP300-TAF1	ENSG00000038382	5	14144779	14145115	14264869	14265219	HiC_interaction_with_promoter-1
EP300-TAF1	ENSG00000038532	16	11009688	11010048	11059679	11060015	HiC_interaction_with_promoter-1
EP300-TAF1	ENSG00000038532	16	11009683	11010053	11059679	11060015	HiC_interaction_with_promoter-1
FOXM1-GATAD2B	ENSG00000039068	16	68774816	68775336	68774862	68775382	HiC_interaction_with_promoter-1
FOXM1-GATAD2B	ENSG00000039068	16	68774816	68775336	68794598	68795118	HiC_interaction_with_promoter-1
FOXM1-GATAD2B	ENSG00000039068	16	68774816	68775336	68794798	68795318	HiC_interaction_with_promoter-1
JUND-RELB	ENSG00000039068	16	68774787	68775269	68794720	68795004	HiC_interaction_with_promoter-1
ATF2-RELB	ENSG00000039068	16	68774787	68775269	68794742	68795075	HiC_interaction_with_promoter-1
ATF2-RELB	ENSG00000039068	16	68774787	68775269	68774842	68775346	HiC_interaction_with_promoter-1
ATF2-RELB	ENSG00000039068	16	68774787	68775269	68794739	68795092	HiC_interaction_with_promoter-1
SRF-ZNF592	ENSG00000039068	16	68774979	68775179	68794893	68795177	HiC_interaction_with_promoter-1
RELB-ZNF592	ENSG00000039068	16	68774787	68775269	68794893	68795177	HiC_interaction_with_promoter-1
JUND-ZNF24	ENSG00000039068	16	68774959	68775289	68794720	68795004	HiC_interaction_with_promoter-1
FOXM1-PKNOX1	ENSG00000039068	16	68774816	68775336	68794679	68795120	HiC_interaction_with_promoter-1
EP300-TAF1	ENSG00000039068	16	68774922	68775282	68794810	68795150	HiC_interaction_with_promoter-1
EP300-TAF1	ENSG00000039068	16	68774922	68775282	68794776	68795112	HiC_interaction_with_promoter-1
EP300-TAF1	ENSG00000039068	16	68774887	68775243	68794810	68795150	HiC_interaction_with_promoter-1
EP300-TAF1	ENSG00000039068	16	68774887	68775243	68794776	68795112	HiC_interaction_with_promoter-1
EP300-TAF1	ENSG00000039068	16	68774917	68775287	68794810	68795150	HiC_interaction_with_promoter-1
EP300-TAF1	ENSG00000039068	16	68774917	68775287	68794776	68795112	HiC_interaction_with_promoter-1
EP300-TAF1	ENSG00000039068	16	68774889	68775239	68794810	68795150	HiC_interaction_with_promoter-1
EP300-TAF1	ENSG00000039068	16	68774889	68775239	68794776	68795112	HiC_interaction_with_promoter-1
RELB-SPI1	ENSG00000039068	16	68774787	68775269	68774891	68775202	HiC_interaction_with_promoter-1
ATF2-RELB	ENSG00000039123	5	54634662	54635021	54634703	54635207	HiC_interaction_with_promoter-1
RELB-STAT1	ENSG00000039123	5	54634747	54635111	54634662	54635021	HiC_interaction_with_promoter-1
MLLT1-RFX5	ENSG00000039650	19	50379799	50380135	50379952	50380687	HiC_interaction_with_promoter-1
MLLT1-RFX5	ENSG00000039650	19	50379799	50380135	50399541	50400371	HiC_interaction_with_promoter-1
MLLT1-RFX5	ENSG00000039650	19	50379879	50380215	50379952	50380687	HiC_interaction_with_promoter-1
MLLT1-RFX5	ENSG00000039650	19	50379879	50380215	50399541	50400371	HiC_interaction_with_promoter-1
ATF2-NRF1	ENSG00000039650	19	50379959	50380209	50414556	50415076	HiC_interaction_with_promoter-1
ATF2-NRF1	ENSG00000039650	19	50379959	50380209	50379763	50380283	HiC_interaction_with_promoter-1
ATF2-NRF1	ENSG00000039650	19	50379959	50380209	50379944	50380106	HiC_interaction_with_promoter-1
ATF2-RELB	ENSG00000039650	19	50399982	50400746	50414556	50415076	HiC_interaction_with_promoter-1
MAZ-PBX3	ENSG00000039650	19	50379828	50380044	50379746	50380170	HiC_interaction_with_promoter-1
MAZ-PBX3	ENSG00000039650	19	50379828	50380044	50379761	50380197	HiC_interaction_with_promoter-1
MAZ-PBX3	ENSG00000039650	19	50379828	50380044	50400000	50400436	HiC_interaction_with_promoter-1
ATF2-ESRRA	ENSG00000039650	19	50379922	50380286	50414556	50415076	HiC_interaction_with_promoter-1
ATF2-ESRRA	ENSG00000039650	19	50379922	50380286	50379763	50380283	HiC_interaction_with_promoter-1
ATF2-ESRRA	ENSG00000039650	19	50379922	50380286	50379944	50380106	HiC_interaction_with_promoter-1
ASH2L-MAZ	ENSG00000039987	19	12834607	12835031	12899704	12900288	HiC_interaction_with_promoter-1
ASH2L-MAZ	ENSG00000039987	19	12834629	12835065	12899704	12900288	HiC_interaction_with_promoter-1
ASH2L-MAZ	ENSG00000039987	19	12889837	12890273	12899704	12900288	HiC_interaction_with_promoter-1
ASH2L-MAZ	ENSG00000039987	19	12889828	12890252	12899704	12900288	HiC_interaction_with_promoter-1
GATAD2B-PBX3	ENSG00000040531	17	3539856	3540376	3539897	3540113	HiC_interaction_with_promoter-1
GATAD2B-PBX3	ENSG00000040531	17	3539856	3540376	3539894	3540114	HiC_interaction_with_promoter-1
MAZ-PBX3	ENSG00000040531	17	3539693	3540129	3539897	3540113	HiC_interaction_with_promoter-1
MAZ-PBX3	ENSG00000040531	17	3539693	3540129	3539894	3540114	HiC_interaction_with_promoter-1
MAZ-PBX3	ENSG00000040531	17	3539699	3540123	3539897	3540113	HiC_interaction_with_promoter-1
MAZ-PBX3	ENSG00000040531	17	3539699	3540123	3539894	3540114	HiC_interaction_with_promoter-1
FOXM1-GATAD2B	ENSG00000040933	2	99099586	99100106	99224704	99225224	HiC_interaction_with_promoter-1
FOXM1-GATAD2B	ENSG00000040933	2	99089504	99090024	99224704	99225224	HiC_interaction_with_promoter-1
FOXM1-GATAD2B	ENSG00000040933	2	99099798	99100318	99224704	99225224	HiC_interaction_with_promoter-1
JUND-RELB	ENSG00000040933	2	99099588	99100064	99099722	99100006	HiC_interaction_with_promoter-1
JUND-RELB	ENSG00000040933	2	99084877	99085477	99099722	99100006	HiC_interaction_with_promoter-1
ATF2-RELB	ENSG00000040933	2	99099588	99100064	99224759	99225263	HiC_interaction_with_promoter-1
ATF2-RELB	ENSG00000040933	2	99099588	99100064	99224751	99225271	HiC_interaction_with_promoter-1
ATF2-RELB	ENSG00000040933	2	99084877	99085477	99224759	99225263	HiC_interaction_with_promoter-1
ATF2-RELB	ENSG00000040933	2	99084877	99085477	99224751	99225271	HiC_interaction_with_promoter-1
SMAD1-ZNF592	ENSG00000040933	2	99099851	99100235	99099753	99100037	HiC_interaction_with_promoter-1
SMAD1-ZNF592	ENSG00000040933	2	99099652	99100036	99099753	99100037	HiC_interaction_with_promoter-1
EP300-PBX3	ENSG00000040933	2	99099871	99100087	99099646	99100006	HiC_interaction_with_promoter-1
EP300-PBX3	ENSG00000040933	2	99099871	99100087	99099631	99100001	HiC_interaction_with_promoter-1
GATAD2B-PBX3	ENSG00000040933	2	99099586	99100106	99099871	99100087	HiC_interaction_with_promoter-1
GATAD2B-PBX3	ENSG00000040933	2	99089504	99090024	99099871	99100087	HiC_interaction_with_promoter-1
GATAD2B-PBX3	ENSG00000040933	2	99099798	99100318	99099871	99100087	HiC_interaction_with_promoter-1
SRF-ZNF592	ENSG00000040933	2	99099753	99100037	99099623	99100003	HiC_interaction_with_promoter-1
SRF-ZNF592	ENSG00000040933	2	99099753	99100037	99224856	99225080	HiC_interaction_with_promoter-1
SRF-ZNF592	ENSG00000040933	2	99099753	99100037	99224809	99225009	HiC_interaction_with_promoter-1
ARID3A-GATAD2B	ENSG00000040933	2	99099586	99100106	99099730	99100080	HiC_interaction_with_promoter-1
ARID3A-GATAD2B	ENSG00000040933	2	99099586	99100106	99224812	99225162	HiC_interaction_with_promoter-1
ARID3A-GATAD2B	ENSG00000040933	2	99089504	99090024	99099730	99100080	HiC_interaction_with_promoter-1
ARID3A-GATAD2B	ENSG00000040933	2	99089504	99090024	99224812	99225162	HiC_interaction_with_promoter-1
ARID3A-GATAD2B	ENSG00000040933	2	99099798	99100318	99099730	99100080	HiC_interaction_with_promoter-1
ARID3A-GATAD2B	ENSG00000040933	2	99099798	99100318	99224812	99225162	HiC_interaction_with_promoter-1
RELB-ZNF592	ENSG00000040933	2	99099588	99100064	99099753	99100037	HiC_interaction_with_promoter-1
RELB-ZNF592	ENSG00000040933	2	99084877	99085477	99099753	99100037	HiC_interaction_with_promoter-1
FOXK2-MTA2	ENSG00000040933	2	99099628	99100060	99224720	99225130	HiC_interaction_with_promoter-1
FOXK2-MTA2	ENSG00000040933	2	99084901	99085461	99089604	99090014	HiC_interaction_with_promoter-1
FOXK2-MTA2	ENSG00000040933	2	99084901	99085461	99224720	99225130	HiC_interaction_with_promoter-1
FOXK2-MTA2	ENSG00000040933	2	99099628	99100043	99224720	99225130	HiC_interaction_with_promoter-1
FOXM1-PKNOX1	ENSG00000040933	2	99099580	99100004	99224704	99225224	HiC_interaction_with_promoter-1
FOXM1-PKNOX1	ENSG00000040933	2	99084907	99085331	99224704	99225224	HiC_interaction_with_promoter-1
FOXM1-PKNOX1	ENSG00000040933	2	99084907	99085331	99084926	99085446	HiC_interaction_with_promoter-1
EP300-TAF1	ENSG00000040933	2	99099698	99100034	99099646	99100006	HiC_interaction_with_promoter-1
EP300-TAF1	ENSG00000040933	2	99099698	99100034	99099631	99100001	HiC_interaction_with_promoter-1
RELB-SPI1	ENSG00000040933	2	99099588	99100064	99224894	99225170	HiC_interaction_with_promoter-1
RELB-SPI1	ENSG00000040933	2	99084877	99085477	99224894	99225170	HiC_interaction_with_promoter-1
RELB-STAT1	ENSG00000040933	2	99099588	99100064	99099651	99100015	HiC_interaction_with_promoter-1
RELB-STAT1	ENSG00000040933	2	99099588	99100064	99224756	99225120	HiC_interaction_with_promoter-1
RELB-STAT1	ENSG00000040933	2	99084877	99085477	99099651	99100015	HiC_interaction_with_promoter-1
RELB-STAT1	ENSG00000040933	2	99084877	99085477	99224756	99225120	HiC_interaction_with_promoter-1
FOXM1-GATAD2B	ENSG00000041880	3	52029608	52030128	52029624	52030144	HiC_interaction_with_promoter-1
ATF2-RELB	ENSG00000041880	3	52029666	52030109	52029680	52030184	HiC_interaction_with_promoter-1
CREM-RELA	ENSG00000041880	3	52029863	52030047	52029727	52030111	HiC_interaction_with_promoter-1
GATAD2B-RELA	ENSG00000041880	3	52029624	52030144	52029727	52030111	HiC_interaction_with_promoter-1
FOXK2-MTA2	ENSG00000041880	3	52029728	52030138	52029776	52030096	HiC_interaction_with_promoter-1
FOXM1-PKNOX1	ENSG00000041880	3	52029608	52030128	52029854	52030066	HiC_interaction_with_promoter-1
RELB-STAT1	ENSG00000041880	3	52029729	52030093	52029666	52030109	HiC_interaction_with_promoter-1
RELB-STAT1	ENSG00000041880	3	52029745	52030175	52029666	52030109	HiC_interaction_with_promoter-1
RELB-SPI1	ENSG00000041988	1	6659943	6660044	6684758	6685358	HiC_interaction_with_promoter-1
RELB-SPI1	ENSG00000041988	1	6659943	6660044	6684543	6685143	HiC_interaction_with_promoter-1
RELB-SPI1	ENSG00000042429	11	93489814	93490414	93489987	93490157	HiC_interaction_with_promoter-1
FOXM1-GATAD2B	ENSG00000043143	5	133879624	133880144	133879647	133880167	HiC_interaction_with_promoter-1
GATAD2B-RELA	ENSG00000043143	5	133879617	133880001	133879624	133880144	HiC_interaction_with_promoter-1
FOXM1-GATAD2B	ENSG00000043462	5	169694791	169695311	169739536	169740056	HiC_interaction_with_promoter-1
EP300-TAF1	ENSG00000047056	10	1094895	1095235	1094861	1095231	HiC_interaction_with_promoter-1
EP300-TAF1	ENSG00000047056	10	1094895	1095235	1094867	1095227	HiC_interaction_with_promoter-1
EP300-TAF1	ENSG00000047056	10	1094890	1095226	1094861	1095231	HiC_interaction_with_promoter-1
EP300-TAF1	ENSG00000047056	10	1094890	1095226	1094867	1095227	HiC_interaction_with_promoter-1
ATF2-RELB	ENSG00000047410	1	186344602	186345106	186344406	186345288	HiC_interaction_with_promoter-1
ATF2-RELB	ENSG00000047410	1	186344602	186345106	186344406	186345256	HiC_interaction_with_promoter-1
FOXM1-PKNOX1	ENSG00000048052	7	18534995	18535515	18559846	18560270	HiC_interaction_with_promoter-1
ATF2-RELB	ENSG00000048462	16	12009700	12010220	12059951	12060551	HiC_interaction_with_promoter-1
ATF2-RELB	ENSG00000048462	16	12009708	12010212	12059951	12060551	HiC_interaction_with_promoter-1
RELB-ZNF592	ENSG00000048462	16	12009845	12010129	12059951	12060551	HiC_interaction_with_promoter-1
ASH2L-MAZ	ENSG00000048462	16	12009715	12010139	12059812	12060396	HiC_interaction_with_promoter-1
ASH2L-MAZ	ENSG00000048462	16	12009700	12010136	12059812	12060396	HiC_interaction_with_promoter-1
ASH2L-MAZ	ENSG00000048462	16	12009945	12010369	12059812	12060396	HiC_interaction_with_promoter-1
RELB-STAT1	ENSG00000048462	16	12009909	12010273	12059951	12060551	HiC_interaction_with_promoter-1
ATF2-RELB	ENSG00000048471	16	12059951	12060551	12254612	12255116	HiC_interaction_with_promoter-1
BCL3-HDAC2	ENSG00000048471	16	12059917	12060433	12254675	12255019	HiC_interaction_with_promoter-1
FOXM1-GATAD2B	ENSG00000048707	1	12289946	12290325	12289786	12290306	HiC_interaction_with_promoter-1
ARID3A-GATAD2B	ENSG00000048707	1	12289946	12290325	12289998	12290143	HiC_interaction_with_promoter-1
ASH2L-MAZ	ENSG00000048707	1	12289858	12290282	12289912	12290496	HiC_interaction_with_promoter-1
ASH2L-MAZ	ENSG00000048707	1	12289860	12290296	12289912	12290496	HiC_interaction_with_promoter-1
ARID3A-GATAD2B	ENSG00000049239	1	9294960	9295310	9294811	9295124	HiC_interaction_with_promoter-1
ARID3A-GATAD2B	ENSG00000049239	1	9294960	9295310	9354565	9355085	HiC_interaction_with_promoter-1
ARID3A-GATAD2B	ENSG00000049239	1	9294960	9295310	9299586	9300106	HiC_interaction_with_promoter-1
EP300-TAF1	ENSG00000049239	1	9294713	9295049	9299728	9300088	HiC_interaction_with_promoter-1
EP300-TAF1	ENSG00000049239	1	9294716	9295056	9299728	9300088	HiC_interaction_with_promoter-1
EP300-TAF1	ENSG00000049239	1	9299733	9300069	9299728	9300088	HiC_interaction_with_promoter-1
MAZ-PBX3	ENSG00000049239	1	9294901	9295121	9299742	9300166	HiC_interaction_with_promoter-1
MAZ-PBX3	ENSG00000049239	1	9294901	9295121	9294703	9295139	HiC_interaction_with_promoter-1
MAZ-PBX3	ENSG00000049239	1	9294901	9295121	9299736	9300172	HiC_interaction_with_promoter-1
MAZ-PBX3	ENSG00000049239	1	9294901	9295121	9294712	9295136	HiC_interaction_with_promoter-1
MAZ-PBX3	ENSG00000049239	1	9294903	9295119	9299742	9300166	HiC_interaction_with_promoter-1
MAZ-PBX3	ENSG00000049239	1	9294903	9295119	9294703	9295139	HiC_interaction_with_promoter-1
MAZ-PBX3	ENSG00000049239	1	9294903	9295119	9299736	9300172	HiC_interaction_with_promoter-1
MAZ-PBX3	ENSG00000049239	1	9294903	9295119	9294712	9295136	HiC_interaction_with_promoter-1
EP300-PBX3	ENSG00000049239	1	9294901	9295121	9299728	9300088	HiC_interaction_with_promoter-1
EP300-PBX3	ENSG00000049239	1	9294903	9295119	9299728	9300088	HiC_interaction_with_promoter-1
GATAD2B-PBX3	ENSG00000049239	1	9294811	9295124	9294901	9295121	HiC_interaction_with_promoter-1
GATAD2B-PBX3	ENSG00000049239	1	9294811	9295124	9294903	9295119	HiC_interaction_with_promoter-1
JUND-RELB	ENSG00000049860	5	73934862	73935462	73934912	73935222	HiC_interaction_with_promoter-1
ATF2-RELB	ENSG00000049860	5	73934862	73935462	73934889	73935393	HiC_interaction_with_promoter-1
ATF2-JUND	ENSG00000049860	5	73934889	73935393	73934912	73935222	HiC_interaction_with_promoter-1
ARID3A-GATAD2B	ENSG00000050344	7	26239699	26240049	26239689	26240209	HiC_interaction_with_promoter-1
ARID3A-GATAD2B	ENSG00000050344	7	26239699	26240049	26239928	26240448	HiC_interaction_with_promoter-1
GATAD2B-RELA	ENSG00000050344	7	26239689	26240209	26239912	26240296	HiC_interaction_with_promoter-1
GATAD2B-RELA	ENSG00000050344	7	26239928	26240448	26239912	26240296	HiC_interaction_with_promoter-1
RELB-STAT1	ENSG00000050393	6	13814734	13815334	13814621	13815051	HiC_interaction_with_promoter-1
GATAD2B-RELA	ENSG00000051128	19	19029964	19030348	19029969	19030489	HiC_interaction_with_promoter-1
ARID3A-GATAD2B	ENSG00000051341	3	121264782	121265132	121264871	121265391	HiC_interaction_with_promoter-1
ARID3A-GATAD2B	ENSG00000051341	3	121264782	121265132	121264534	121265054	HiC_interaction_with_promoter-1
CREM-RELA	ENSG00000051341	3	121264711	121265071	121264825	121265209	HiC_interaction_with_promoter-1
GATAD2B-RELA	ENSG00000051341	3	121264825	121265209	121264871	121265391	HiC_interaction_with_promoter-1
GATAD2B-RELA	ENSG00000051341	3	121264825	121265209	121264534	121265054	HiC_interaction_with_promoter-1
EP300-TAF1	ENSG00000051341	3	121264771	121265111	121264937	121265297	HiC_interaction_with_promoter-1
EP300-TAF1	ENSG00000051341	3	121264773	121265109	121264937	121265297	HiC_interaction_with_promoter-1
ATF2-RELB	ENSG00000051341	3	121264615	121265119	121264736	121265083	HiC_interaction_with_promoter-1
ATF2-RELB	ENSG00000051341	3	121264605	121265125	121264736	121265083	HiC_interaction_with_promoter-1
RELB-STAT1	ENSG00000051341	3	121264692	121265056	121264736	121265083	HiC_interaction_with_promoter-1
ARID3A-GATAD2B	ENSG00000054118	1	36689757	36690107	36689965	36690485	HiC_interaction_with_promoter-1
ARID3A-GATAD2B	ENSG00000054118	1	36689757	36690107	36689711	36690231	HiC_interaction_with_promoter-1
EP300-TAF1	ENSG00000054118	1	36689654	36690014	36689944	36690280	HiC_interaction_with_promoter-1
EP300-TAF1	ENSG00000054118	1	36689654	36690014	36689942	36690282	HiC_interaction_with_promoter-1
RELB-STAT1	ENSG00000054179	9	139929859	139930223	139979920	139980520	HiC_interaction_with_promoter-1
RELB-STAT1	ENSG00000054179	9	139964816	139965180	139979920	139980520	HiC_interaction_with_promoter-1
ATF2-RELB	ENSG00000054219	2	160659772	160660037	160749639	160750239	HiC_interaction_with_promoter-1
ATF2-RELB	ENSG00000054219	2	160749548	160750052	160749639	160750239	HiC_interaction_with_promoter-1
ATF2-RELB	ENSG00000054611	22	47169961	47170465	47169407	47170561	HiC_interaction_with_promoter-1
ATF2-RELB	ENSG00000054611	22	47169978	47170498	47169407	47170561	HiC_interaction_with_promoter-1
ATF2-ESRRA	ENSG00000054611	22	47154725	47155089	47169961	47170465	HiC_interaction_with_promoter-1
ATF2-ESRRA	ENSG00000054611	22	47154725	47155089	47169978	47170498	HiC_interaction_with_promoter-1
RELB-STAT1	ENSG00000054611	22	47169869	47170233	47169407	47170561	HiC_interaction_with_promoter-1
ATF2-RELB	ENSG00000054965	11	73239407	73240007	73289714	73290234	HiC_interaction_with_promoter-1
MAZ-PBX3	ENSG00000054965	11	73104615	73105039	73289843	73290063	HiC_interaction_with_promoter-1
MAZ-PBX3	ENSG00000054965	11	73104615	73105039	73289845	73290061	HiC_interaction_with_promoter-1
FOXM1-PKNOX1	ENSG00000055163	5	156679723	156680243	156679792	156680125	HiC_interaction_with_promoter-1
FOXM1-PKNOX1	ENSG00000055163	5	156679723	156680243	156679939	156680363	HiC_interaction_with_promoter-1
ATF2-RELB	ENSG00000055163	5	156679803	156680403	156679697	156680201	HiC_interaction_with_promoter-1
ATF2-RELB	ENSG00000055163	5	156679803	156680403	156679688	156680208	HiC_interaction_with_promoter-1
EP300-PBX3	ENSG00000055163	5	156679825	156680045	156679834	156680194	HiC_interaction_with_promoter-1
EP300-PBX3	ENSG00000055163	5	156679825	156680045	156679829	156680199	HiC_interaction_with_promoter-1
EP300-PBX3	ENSG00000055163	5	156679825	156680045	156679785	156680135	HiC_interaction_with_promoter-1
EP300-PBX3	ENSG00000055163	5	156679860	156680076	156679834	156680194	HiC_interaction_with_promoter-1
EP300-PBX3	ENSG00000055163	5	156679860	156680076	156679829	156680199	HiC_interaction_with_promoter-1
EP300-PBX3	ENSG00000055163	5	156679860	156680076	156679785	156680135	HiC_interaction_with_promoter-1
ATF2-RELB	ENSG00000055208	6	149539614	149540118	149639940	149640540	HiC_interaction_with_promoter-1
FOXM1-GATAD2B	ENSG00000055957	3	52804864	52805384	52804881	52805401	HiC_interaction_with_promoter-1
FOXM1-GATAD2B	ENSG00000055957	3	52804864	52805384	52804679	52805199	HiC_interaction_with_promoter-1
CREM-RELA	ENSG00000055957	3	52804954	52805338	52804987	52805204	HiC_interaction_with_promoter-1
GATAD2B-RELA	ENSG00000055957	3	52804881	52805401	52804954	52805338	HiC_interaction_with_promoter-1
GATAD2B-RELA	ENSG00000055957	3	52804679	52805199	52804954	52805338	HiC_interaction_with_promoter-1
EP300-TAF1	ENSG00000056097	5	32444664	32445000	32444871	32445221	HiC_interaction_with_promoter-1
FOXM1-GATAD2B	ENSG00000056558	9	123639671	123640191	123654994	123655306	HiC_interaction_with_promoter-1
FOXM1-GATAD2B	ENSG00000056558	9	123654665	123655185	123654994	123655306	HiC_interaction_with_promoter-1
MLLT1-RFX5	ENSG00000056558	9	123639963	123640362	123639811	123640147	HiC_interaction_with_promoter-1
ARID3A-GATAD2B	ENSG00000056558	9	123639671	123640191	123654954	123655151	HiC_interaction_with_promoter-1
ARID3A-GATAD2B	ENSG00000056558	9	123654665	123655185	123654954	123655151	HiC_interaction_with_promoter-1
CREM-RELA	ENSG00000056558	9	123639958	123640318	123654965	123655349	HiC_interaction_with_promoter-1
GATAD2B-RELA	ENSG00000056558	9	123639671	123640191	123654965	123655349	HiC_interaction_with_promoter-1
GATAD2B-RELA	ENSG00000056558	9	123654665	123655185	123654965	123655349	HiC_interaction_with_promoter-1
JUND-ZNF24	ENSG00000056558	9	123654944	123655274	123654982	123655266	HiC_interaction_with_promoter-1
JUND-ZNF24	ENSG00000056558	9	123654944	123655274	123654961	123655271	HiC_interaction_with_promoter-1
EP300-TAF1	ENSG00000056558	9	123639668	123640008	123654973	123655343	HiC_interaction_with_promoter-1
EP300-TAF1	ENSG00000056558	9	123639668	123640008	123654957	123655313	HiC_interaction_with_promoter-1
EP300-TAF1	ENSG00000056558	9	123639668	123640008	123639750	123640110	HiC_interaction_with_promoter-1
EP300-TAF1	ENSG00000056558	9	123639668	123640008	123654962	123655312	HiC_interaction_with_promoter-1
EP300-TAF1	ENSG00000056558	9	123639668	123640008	123654945	123655305	HiC_interaction_with_promoter-1
EP300-TAF1	ENSG00000056558	9	123639670	123640006	123654973	123655343	HiC_interaction_with_promoter-1
EP300-TAF1	ENSG00000056558	9	123639670	123640006	123654957	123655313	HiC_interaction_with_promoter-1
EP300-TAF1	ENSG00000056558	9	123639670	123640006	123639750	123640110	HiC_interaction_with_promoter-1
EP300-TAF1	ENSG00000056558	9	123639670	123640006	123654962	123655312	HiC_interaction_with_promoter-1
EP300-TAF1	ENSG00000056558	9	123639670	123640006	123654945	123655305	HiC_interaction_with_promoter-1
ATF2-JUND	ENSG00000056558	9	123639848	123640352	123654982	123655266	HiC_interaction_with_promoter-1
ATF2-JUND	ENSG00000056558	9	123639848	123640352	123654961	123655271	HiC_interaction_with_promoter-1
ATF2-JUND	ENSG00000056558	9	123654983	123655286	123654982	123655266	HiC_interaction_with_promoter-1
ATF2-JUND	ENSG00000056558	9	123654983	123655286	123654961	123655271	HiC_interaction_with_promoter-1
ARID3A-GATAD2B	ENSG00000058085	1	183149828	183150178	183239679	183240199	HiC_interaction_with_promoter-1
ARID3A-GATAD2B	ENSG00000058085	1	183149828	183150178	183149930	183150450	HiC_interaction_with_promoter-1
ATF2-RELB	ENSG00000058085	1	183149819	183150360	183239508	183240012	HiC_interaction_with_promoter-1
ATF2-RELB	ENSG00000058085	1	183149819	183150360	183239502	183240022	HiC_interaction_with_promoter-1
ATF2-RELB	ENSG00000058085	1	183149819	183150373	183239508	183240012	HiC_interaction_with_promoter-1
ATF2-RELB	ENSG00000058085	1	183149819	183150373	183239502	183240022	HiC_interaction_with_promoter-1
ARID3A-GATAD2B	ENSG00000058600	16	22309678	22310028	22309578	22310098	HiC_interaction_with_promoter-1
ATF2-ESRRA	ENSG00000058600	16	22309533	22310037	22309851	22310215	HiC_interaction_with_promoter-1
ATF2-ESRRA	ENSG00000058600	16	22309525	22310045	22309851	22310215	HiC_interaction_with_promoter-1
EP300-TAF1	ENSG00000058600	16	22309663	22310023	22309685	22310025	HiC_interaction_with_promoter-1
EP300-TAF1	ENSG00000058600	16	22309733	22310003	22309685	22310025	HiC_interaction_with_promoter-1
EP300-TAF1	ENSG00000058600	16	22309658	22310028	22309685	22310025	HiC_interaction_with_promoter-1
FOXK2-MTA2	ENSG00000058668	1	203594770	203595180	203594737	203595297	HiC_interaction_with_promoter-1
ATF2-RELB	ENSG00000058673	1	203764625	203765129	203764554	203765154	HiC_interaction_with_promoter-1
FOXM1-GATAD2B	ENSG00000058866	3	186059959	186060479	186079626	186080146	HiC_interaction_with_promoter-1
FOXM1-GATAD2B	ENSG00000058866	3	185959520	185960040	186079626	186080146	HiC_interaction_with_promoter-1
FOXM1-GATAD2B	ENSG00000059588	1	234614647	234615167	234629730	234630250	HiC_interaction_with_promoter-1
ATF2-NRF1	ENSG00000059588	1	234534728	234535232	234614800	234615050	HiC_interaction_with_promoter-1
ATF2-NRF1	ENSG00000059588	1	234534526	234535030	234614800	234615050	HiC_interaction_with_promoter-1
ATF2-NRF1	ENSG00000059588	1	234534521	234535041	234614800	234615050	HiC_interaction_with_promoter-1
RELB-STAT1	ENSG00000059588	1	234614728	234615092	234614855	234615455	HiC_interaction_with_promoter-1
FOXM1-GATAD2B	ENSG00000059915	10	104154956	104155476	104154833	104155353	HiC_interaction_with_promoter-1
GATAD2B-RELA	ENSG00000059915	10	104154954	104155338	104154956	104155476	HiC_interaction_with_promoter-1
RELB-STAT1	ENSG00000059915	10	104154926	104155564	104154922	104155286	HiC_interaction_with_promoter-1
EP300-TAF1	ENSG00000060069	18	77439662	77440002	77439648	77440008	HiC_interaction_with_promoter-1
EP300-TAF1	ENSG00000060069	18	77439662	77440002	77439643	77440013	HiC_interaction_with_promoter-1
ATF2-RELB	ENSG00000060237	12	909545	910145	919810	920166	HiC_interaction_with_promoter-1
ATF2-RELB	ENSG00000060237	12	909545	910145	919822	920152	HiC_interaction_with_promoter-1
ATF2-RELB	ENSG00000060237	12	864783	865383	919810	920166	HiC_interaction_with_promoter-1
ATF2-RELB	ENSG00000060237	12	864783	865383	919822	920152	HiC_interaction_with_promoter-1
GATAD2B-RELA	ENSG00000060491	20	61469694	61470214	61489799	61490183	HiC_interaction_with_promoter-1
RELB-STAT1	ENSG00000060971	3	38179973	38180337	38179990	38180590	HiC_interaction_with_promoter-1
FOXM1-GATAD2B	ENSG00000060982	12	24974800	24975320	25104762	25105282	HiC_interaction_with_promoter-1
FOXM1-GATAD2B	ENSG00000060982	12	25104618	25105138	25104762	25105282	HiC_interaction_with_promoter-1
JUND-RELB	ENSG00000060982	12	25099833	25100433	25104798	25105082	HiC_interaction_with_promoter-1
JUND-RELB	ENSG00000060982	12	25104689	25105240	25104798	25105082	HiC_interaction_with_promoter-1
JUND-RELB	ENSG00000060982	12	25104689	25105251	25104798	25105082	HiC_interaction_with_promoter-1
JUND-RELB	ENSG00000060982	12	25084578	25085178	25104798	25105082	HiC_interaction_with_promoter-1
ESRRA-JUND	ENSG00000060982	12	25104798	25105082	25104826	25105190	HiC_interaction_with_promoter-1
ATF2-RELB	ENSG00000060982	12	25084545	25085049	25099833	25100433	HiC_interaction_with_promoter-1
ATF2-RELB	ENSG00000060982	12	25084545	25085049	25104689	25105240	HiC_interaction_with_promoter-1
ATF2-RELB	ENSG00000060982	12	25084545	25085049	25104689	25105251	HiC_interaction_with_promoter-1
ATF2-RELB	ENSG00000060982	12	25104893	25105110	25104689	25105240	HiC_interaction_with_promoter-1
ATF2-RELB	ENSG00000060982	12	25104893	25105110	25104689	25105251	HiC_interaction_with_promoter-1
ATF2-RELB	ENSG00000060982	12	25104740	25105244	25104689	25105240	HiC_interaction_with_promoter-1
ATF2-RELB	ENSG00000060982	12	25104740	25105244	25104689	25105251	HiC_interaction_with_promoter-1
ATF2-RELB	ENSG00000060982	12	25084538	25085058	25099833	25100433	HiC_interaction_with_promoter-1
ATF2-RELB	ENSG00000060982	12	25084538	25085058	25104689	25105240	HiC_interaction_with_promoter-1
ATF2-RELB	ENSG00000060982	12	25084538	25085058	25104689	25105251	HiC_interaction_with_promoter-1
CREM-RELA	ENSG00000060982	12	25099752	25100112	25104847	25105231	HiC_interaction_with_promoter-1
CREM-RELA	ENSG00000060982	12	24974705	24975065	25104847	25105231	HiC_interaction_with_promoter-1
GATAD2B-RELA	ENSG00000060982	12	24974800	24975320	25104847	25105231	HiC_interaction_with_promoter-1
GATAD2B-RELA	ENSG00000060982	12	25104618	25105138	25104847	25105231	HiC_interaction_with_promoter-1
FOXK2-MTA2	ENSG00000060982	12	25104876	25105135	25104693	25105069	HiC_interaction_with_promoter-1
FOXK2-MTA2	ENSG00000060982	12	24974948	24975465	25104693	25105069	HiC_interaction_with_promoter-1
FOXK2-MTA2	ENSG00000060982	12	25084546	25085106	25104693	25105069	HiC_interaction_with_promoter-1
FOXK2-MTA2	ENSG00000060982	12	25074997	25075557	25104693	25105069	HiC_interaction_with_promoter-1
FOXM1-PKNOX1	ENSG00000060982	12	25104762	25105282	25104745	25105169	HiC_interaction_with_promoter-1
FOXM1-PKNOX1	ENSG00000060982	12	25084532	25085052	25104745	25105169	HiC_interaction_with_promoter-1
ATF2-ESRRA	ENSG00000060982	12	25084545	25085049	25104826	25105190	HiC_interaction_with_promoter-1
ATF2-ESRRA	ENSG00000060982	12	25104893	25105110	25104826	25105190	HiC_interaction_with_promoter-1
ATF2-ESRRA	ENSG00000060982	12	25104740	25105244	25104826	25105190	HiC_interaction_with_promoter-1
ATF2-ESRRA	ENSG00000060982	12	25084538	25085058	25104826	25105190	HiC_interaction_with_promoter-1
EP300-TAF1	ENSG00000060982	12	25104969	25105329	25104791	25105131	HiC_interaction_with_promoter-1
EP300-TAF1	ENSG00000060982	12	25104795	25105075	25104791	25105131	HiC_interaction_with_promoter-1
EP300-TAF1	ENSG00000060982	12	25104964	25105334	25104791	25105131	HiC_interaction_with_promoter-1
EP300-TAF1	ENSG00000060982	12	25104886	25105236	25104791	25105131	HiC_interaction_with_promoter-1
EP300-TAF1	ENSG00000060982	12	25104842	25105112	25104791	25105131	HiC_interaction_with_promoter-1
EP300-TAF1	ENSG00000060982	12	25104897	25105253	25104791	25105131	HiC_interaction_with_promoter-1
RELB-SPI1	ENSG00000060982	12	25104920	25105195	25104689	25105240	HiC_interaction_with_promoter-1
RELB-SPI1	ENSG00000060982	12	25104920	25105195	25104689	25105251	HiC_interaction_with_promoter-1
ATF2-JUND	ENSG00000060982	12	25084545	25085049	25104798	25105082	HiC_interaction_with_promoter-1
ATF2-JUND	ENSG00000060982	12	25104893	25105110	25104798	25105082	HiC_interaction_with_promoter-1
ATF2-JUND	ENSG00000060982	12	25104740	25105244	25104798	25105082	HiC_interaction_with_promoter-1
ATF2-JUND	ENSG00000060982	12	25084538	25085058	25104798	25105082	HiC_interaction_with_promoter-1
RELB-STAT1	ENSG00000060982	12	25099833	25100433	25104735	25105099	HiC_interaction_with_promoter-1
RELB-STAT1	ENSG00000060982	12	25104689	25105240	25104735	25105099	HiC_interaction_with_promoter-1
RELB-STAT1	ENSG00000060982	12	25104689	25105251	25104735	25105099	HiC_interaction_with_promoter-1
RELB-STAT1	ENSG00000060982	12	25084578	25085178	25104735	25105099	HiC_interaction_with_promoter-1
MLLT1-RFX5	ENSG00000061918	4	156679765	156680051	156679884	156680220	HiC_interaction_with_promoter-1
ATF2-RELB	ENSG00000062194	5	56469600	56470104	56469554	56470095	HiC_interaction_with_promoter-1
FOXM1-PKNOX1	ENSG00000062194	5	56469600	56470120	56469645	56470069	HiC_interaction_with_promoter-1
RELB-STAT1	ENSG00000062194	5	56469826	56470190	56469554	56470095	HiC_interaction_with_promoter-1
FOXM1-GATAD2B	ENSG00000062282	11	75484537	75485057	75484539	75485059	HiC_interaction_with_promoter-1
FOXM1-PKNOX1	ENSG00000062282	11	75484539	75485059	75484552	75485064	HiC_interaction_with_promoter-1
GATAD2B-RELA	ENSG00000062282	11	75484537	75485057	75484623	75485007	HiC_interaction_with_promoter-1
EP300-TAF1	ENSG00000062282	11	75479691	75480031	75484643	75485003	HiC_interaction_with_promoter-1
EP300-TAF1	ENSG00000062282	11	75479693	75480029	75484643	75485003	HiC_interaction_with_promoter-1
ATF2-NRF1	ENSG00000062485	12	56709665	56710185	56709925	56710175	HiC_interaction_with_promoter-1
ATF2-NRF1	ENSG00000062485	12	56709594	56710098	56709925	56710175	HiC_interaction_with_promoter-1
ATF2-NRF1	ENSG00000062485	12	56709794	56710298	56709925	56710175	HiC_interaction_with_promoter-1
ATF2-RELB	ENSG00000062485	12	56709665	56710185	56709622	56710222	HiC_interaction_with_promoter-1
ATF2-RELB	ENSG00000062485	12	56709594	56710098	56709622	56710222	HiC_interaction_with_promoter-1
ATF2-RELB	ENSG00000062485	12	56709794	56710298	56709622	56710222	HiC_interaction_with_promoter-1
FOXK2-MTA2	ENSG00000062524	15	41779918	41780478	41849869	41850279	HiC_interaction_with_promoter-1
FOXM1-GATAD2B	ENSG00000062716	17	57914637	57915157	57914955	57915475	HiC_interaction_with_promoter-1
FOXM1-GATAD2B	ENSG00000062716	17	57889632	57890152	57914955	57915475	HiC_interaction_with_promoter-1
ATF2-RELB	ENSG00000062716	17	57784697	57785201	57914883	57915282	HiC_interaction_with_promoter-1
ATF2-RELB	ENSG00000062716	17	57784570	57785090	57914883	57915282	HiC_interaction_with_promoter-1
FOXM1-PKNOX1	ENSG00000062716	17	57914989	57915363	57914955	57915475	HiC_interaction_with_promoter-1
FOXM1-PKNOX1	ENSG00000062716	17	57784663	57785069	57914955	57915475	HiC_interaction_with_promoter-1
FOXM1-PKNOX1	ENSG00000062716	17	57839883	57840307	57914955	57915475	HiC_interaction_with_promoter-1
RELB-STAT1	ENSG00000062716	17	57889401	57890001	57914776	57915140	HiC_interaction_with_promoter-1
RELB-STAT1	ENSG00000062716	17	57839785	57840385	57914776	57915140	HiC_interaction_with_promoter-1
RELB-STAT1	ENSG00000062716	17	57784771	57785118	57914776	57915140	HiC_interaction_with_promoter-1
RELB-STAT1	ENSG00000062716	17	57914883	57915282	57914776	57915140	HiC_interaction_with_promoter-1
FOXM1-PKNOX1	ENSG00000063046	12	53374523	53375043	53399796	53400303	HiC_interaction_with_promoter-1
MAZ-PBX3	ENSG00000063046	12	53399826	53400046	53399845	53400281	HiC_interaction_with_promoter-1
MAZ-PBX3	ENSG00000063046	12	53399826	53400046	53399876	53400300	HiC_interaction_with_promoter-1
RELB-STAT1	ENSG00000063127	19	49834824	49835188	49834638	49835238	HiC_interaction_with_promoter-1
FOXM1-GATAD2B	ENSG00000063180	19	49149650	49150170	49149486	49150006	HiC_interaction_with_promoter-1
MLLT1-RFX5	ENSG00000063244	19	56154942	56155104	56164985	56165321	HiC_interaction_with_promoter-1
MLLT1-RFX5	ENSG00000063244	19	56154598	56155174	56164985	56165321	HiC_interaction_with_promoter-1
GATAD2B-PBX3	ENSG00000063244	19	56154787	56155003	56164986	56165506	HiC_interaction_with_promoter-1
CREM-RELA	ENSG00000063244	19	56154737	56155121	56154720	56155080	HiC_interaction_with_promoter-1
CREM-RELA	ENSG00000063244	19	56154737	56155121	56164978	56165338	HiC_interaction_with_promoter-1
MAZ-PBX3	ENSG00000063244	19	56154787	56155003	56159580	56160016	HiC_interaction_with_promoter-1
MAZ-PBX3	ENSG00000063244	19	56154787	56155003	56154746	56155170	HiC_interaction_with_promoter-1
MAZ-PBX3	ENSG00000063244	19	56154787	56155003	56164931	56165367	HiC_interaction_with_promoter-1
MAZ-PBX3	ENSG00000063244	19	56154787	56155003	56159581	56160005	HiC_interaction_with_promoter-1
MAZ-PBX3	ENSG00000063244	19	56154787	56155003	56154737	56155173	HiC_interaction_with_promoter-1
ASH2L-MAZ	ENSG00000063244	19	56154725	56155309	56159580	56160016	HiC_interaction_with_promoter-1
ASH2L-MAZ	ENSG00000063244	19	56154725	56155309	56154746	56155170	HiC_interaction_with_promoter-1
ASH2L-MAZ	ENSG00000063244	19	56154725	56155309	56164931	56165367	HiC_interaction_with_promoter-1
ASH2L-MAZ	ENSG00000063244	19	56154725	56155309	56159581	56160005	HiC_interaction_with_promoter-1
ASH2L-MAZ	ENSG00000063244	19	56154725	56155309	56154737	56155173	HiC_interaction_with_promoter-1
RELB-STAT1	ENSG00000063244	19	56154743	56155107	56154658	56155244	HiC_interaction_with_promoter-1
MLLT1-RFX5	ENSG00000063245	19	56154942	56155104	56164985	56165321	HiC_interaction_with_promoter-1
MLLT1-RFX5	ENSG00000063245	19	56154598	56155174	56164985	56165321	HiC_interaction_with_promoter-1
CREM-RELA	ENSG00000063245	19	56154720	56155080	56154737	56155121	HiC_interaction_with_promoter-1
MAZ-PBX3	ENSG00000063245	19	56154787	56155003	56159580	56160016	HiC_interaction_with_promoter-1
MAZ-PBX3	ENSG00000063245	19	56154787	56155003	56154746	56155170	HiC_interaction_with_promoter-1
MAZ-PBX3	ENSG00000063245	19	56154787	56155003	56164931	56165367	HiC_interaction_with_promoter-1
MAZ-PBX3	ENSG00000063245	19	56154787	56155003	56159581	56160005	HiC_interaction_with_promoter-1
MAZ-PBX3	ENSG00000063245	19	56154787	56155003	56154737	56155173	HiC_interaction_with_promoter-1
ASH2L-MAZ	ENSG00000063245	19	56154746	56155170	56154725	56155309	HiC_interaction_with_promoter-1
ASH2L-MAZ	ENSG00000063245	19	56154737	56155173	56154725	56155309	HiC_interaction_with_promoter-1
RELB-STAT1	ENSG00000063245	19	56154743	56155107	56154658	56155244	HiC_interaction_with_promoter-1
ATF2-RELB	ENSG00000063978	4	2499628	2500132	2499562	2500162	HiC_interaction_with_promoter-1
ARID3A-GATAD2B	ENSG00000063978	4	2420000	2420241	2484853	2485203	HiC_interaction_with_promoter-1
ARID3A-GATAD2B	ENSG00000063978	4	2479808	2480328	2484853	2485203	HiC_interaction_with_promoter-1
ARID3A-GATAD2B	ENSG00000063978	4	2414926	2415446	2484853	2485203	HiC_interaction_with_promoter-1
FOXM1-GATAD2B	ENSG00000064313	8	120844763	120845283	120844855	120845375	HiC_interaction_with_promoter-1
FOXK2-MTA2	ENSG00000064313	8	120764564	120765124	120844938	120845348	HiC_interaction_with_promoter-1
FOXK2-MTA2	ENSG00000064313	8	120844978	120845218	120844938	120845348	HiC_interaction_with_promoter-1
FOXM1-PKNOX1	ENSG00000064313	8	120844763	120845283	120844899	120845323	HiC_interaction_with_promoter-1
MAZ-PBX3	ENSG00000064313	8	120844863	120845299	120844971	120845187	HiC_interaction_with_promoter-1
MAZ-PBX3	ENSG00000064313	8	120844869	120845293	120844971	120845187	HiC_interaction_with_promoter-1
RELB-SPI1	ENSG00000064313	8	120844950	120845226	120844753	120845246	HiC_interaction_with_promoter-1
ATF2-RELB	ENSG00000064313	8	120844752	120845256	120844753	120845246	HiC_interaction_with_promoter-1
RELB-STAT1	ENSG00000064313	8	120844790	120845154	120844753	120845246	HiC_interaction_with_promoter-1
GATAD2B-PBX3	ENSG00000064313	8	120844971	120845187	120844855	120845375	HiC_interaction_with_promoter-1
FOXM1-GATAD2B	ENSG00000064419	7	128574700	128575220	128694874	128695394	HiC_interaction_with_promoter-1
FOXM1-GATAD2B	ENSG00000064419	7	128694778	128695298	128694874	128695394	HiC_interaction_with_promoter-1
ATF2-RELB	ENSG00000064419	7	128694920	128695424	128704850	128705450	HiC_interaction_with_promoter-1
ATF2-RELB	ENSG00000064419	7	128694920	128695424	128729601	128730201	HiC_interaction_with_promoter-1
ATF2-RELB	ENSG00000064419	7	128694920	128695424	128694510	128695390	HiC_interaction_with_promoter-1
ATF2-RELB	ENSG00000064419	7	128694920	128695424	128704648	128705248	HiC_interaction_with_promoter-1
ATF2-RELB	ENSG00000064419	7	128574565	128575009	128704850	128705450	HiC_interaction_with_promoter-1
ATF2-RELB	ENSG00000064419	7	128574565	128575009	128694510	128695390	HiC_interaction_with_promoter-1
ATF2-RELB	ENSG00000064419	7	128574565	128575009	128704648	128705248	HiC_interaction_with_promoter-1
ATF2-RELB	ENSG00000064419	7	128694721	128695225	128704850	128705450	HiC_interaction_with_promoter-1
ATF2-RELB	ENSG00000064419	7	128694721	128695225	128729601	128730201	HiC_interaction_with_promoter-1
ATF2-RELB	ENSG00000064419	7	128694721	128695225	128694510	128695390	HiC_interaction_with_promoter-1
ATF2-RELB	ENSG00000064419	7	128694721	128695225	128704648	128705248	HiC_interaction_with_promoter-1
SRF-ZNF592	ENSG00000064419	7	128694948	128695232	128729773	128730029	HiC_interaction_with_promoter-1
SRF-ZNF592	ENSG00000064419	7	128694948	128695232	128694869	128695093	HiC_interaction_with_promoter-1
SRF-ZNF592	ENSG00000064419	7	128694948	128695232	128694903	128695103	HiC_interaction_with_promoter-1
SRF-ZNF592	ENSG00000064419	7	128694948	128695232	128729810	128730010	HiC_interaction_with_promoter-1
SRF-ZNF592	ENSG00000064419	7	128694948	128695232	128729823	128730029	HiC_interaction_with_promoter-1
SRF-ZNF592	ENSG00000064419	7	128694948	128695232	128694953	128695333	HiC_interaction_with_promoter-1
ARID3A-GATAD2B	ENSG00000064419	7	128704769	128705119	128704484	128705004	HiC_interaction_with_promoter-1
CREM-RELA	ENSG00000064419	7	128579651	128580035	128694900	128695260	HiC_interaction_with_promoter-1
CREM-RELA	ENSG00000064419	7	128694813	128695197	128729660	128730020	HiC_interaction_with_promoter-1
CREM-RELA	ENSG00000064419	7	128694813	128695197	128694900	128695260	HiC_interaction_with_promoter-1
RELB-ZNF592	ENSG00000064419	7	128694948	128695232	128704850	128705450	HiC_interaction_with_promoter-1
RELB-ZNF592	ENSG00000064419	7	128694948	128695232	128729601	128730201	HiC_interaction_with_promoter-1
RELB-ZNF592	ENSG00000064419	7	128694948	128695232	128694510	128695390	HiC_interaction_with_promoter-1
RELB-ZNF592	ENSG00000064419	7	128694948	128695232	128704648	128705248	HiC_interaction_with_promoter-1
GATAD2B-RELA	ENSG00000064419	7	128579651	128580035	128694778	128695298	HiC_interaction_with_promoter-1
GATAD2B-RELA	ENSG00000064419	7	128579651	128580035	128704484	128705004	HiC_interaction_with_promoter-1
GATAD2B-RELA	ENSG00000064419	7	128694813	128695197	128694778	128695298	HiC_interaction_with_promoter-1
GATAD2B-RELA	ENSG00000064419	7	128694813	128695197	128704484	128705004	HiC_interaction_with_promoter-1
FOXM1-PKNOX1	ENSG00000064419	7	128694937	128695218	128694874	128695394	HiC_interaction_with_promoter-1
FOXM1-PKNOX1	ENSG00000064419	7	128574694	128575118	128694874	128695394	HiC_interaction_with_promoter-1
RELB-SPI1	ENSG00000064419	7	128649588	128650188	128704837	128705000	HiC_interaction_with_promoter-1
RELB-SPI1	ENSG00000064419	7	128704850	128705450	128704837	128705000	HiC_interaction_with_promoter-1
RELB-SPI1	ENSG00000064419	7	128704850	128705450	128729912	128730111	HiC_interaction_with_promoter-1
RELB-SPI1	ENSG00000064419	7	128694510	128695390	128704837	128705000	HiC_interaction_with_promoter-1
RELB-SPI1	ENSG00000064419	7	128694510	128695390	128729912	128730111	HiC_interaction_with_promoter-1
RELB-SPI1	ENSG00000064419	7	128704648	128705248	128704837	128705000	HiC_interaction_with_promoter-1
RELB-SPI1	ENSG00000064419	7	128704648	128705248	128729912	128730111	HiC_interaction_with_promoter-1
RELB-STAT1	ENSG00000064419	7	128649588	128650188	128694822	128695186	HiC_interaction_with_promoter-1
RELB-STAT1	ENSG00000064419	7	128649588	128650188	128694892	128695322	HiC_interaction_with_promoter-1
RELB-STAT1	ENSG00000064419	7	128694510	128695390	128694822	128695186	HiC_interaction_with_promoter-1
RELB-STAT1	ENSG00000064419	7	128694510	128695390	128694892	128695322	HiC_interaction_with_promoter-1
FOXM1-GATAD2B	ENSG00000064547	19	19754525	19755045	19754574	19755094	HiC_interaction_with_promoter-1
ATF2-RELB	ENSG00000064547	19	19754678	19755182	19754419	19755019	HiC_interaction_with_promoter-1
MAZ-PBX3	ENSG00000064687	19	1039919	1040148	1039808	1040232	HiC_interaction_with_promoter-1
MAZ-PBX3	ENSG00000064687	19	1039919	1040148	1039800	1040236	HiC_interaction_with_promoter-1
MAZ-PBX3	ENSG00000064687	19	1039925	1040144	1039808	1040232	HiC_interaction_with_promoter-1
MAZ-PBX3	ENSG00000064687	19	1039925	1040144	1039800	1040236	HiC_interaction_with_promoter-1
RELB-STAT1	ENSG00000064687	19	1039765	1040129	1039836	1040239	HiC_interaction_with_promoter-1
RELB-STAT1	ENSG00000064687	19	1039966	1040330	1039836	1040239	HiC_interaction_with_promoter-1
FOXM1-GATAD2B	ENSG00000064886	1	111759864	111760384	111759686	111760206	HiC_interaction_with_promoter-1
MLLT1-RFX5	ENSG00000064886	1	111763950	111765283	111764785	111765121	HiC_interaction_with_promoter-1
ARID3A-GATAD2B	ENSG00000064886	1	111759864	111760384	111759868	111760218	HiC_interaction_with_promoter-1
FOXM1-GATAD2B	ENSG00000065000	19	2069626	2070146	2164997	2165517	HiC_interaction_with_promoter-1
FOXM1-PKNOX1	ENSG00000065000	19	2069626	2070146	2164788	2165212	HiC_interaction_with_promoter-1
RELB-SPI1	ENSG00000065000	19	2149888	2150164	2164700	2165300	HiC_interaction_with_promoter-1
FOXM1-GATAD2B	ENSG00000065054	16	2059765	2060285	2059780	2060300	HiC_interaction_with_promoter-1
ARID3A-GATAD2B	ENSG00000065054	16	2059850	2060200	2059765	2060285	HiC_interaction_with_promoter-1
CREM-RELA	ENSG00000065054	16	2059704	2060064	2059757	2060141	HiC_interaction_with_promoter-1
GATAD2B-RELA	ENSG00000065054	16	2059765	2060285	2059757	2060141	HiC_interaction_with_promoter-1
FOXM1-PKNOX1	ENSG00000065054	16	2059846	2060270	2059780	2060300	HiC_interaction_with_promoter-1
FOXM1-GATAD2B	ENSG00000065057	16	2059780	2060300	2059765	2060285	HiC_interaction_with_promoter-1
ARID3A-GATAD2B	ENSG00000065057	16	2059850	2060200	2059765	2060285	HiC_interaction_with_promoter-1
CREM-RELA	ENSG00000065057	16	2059704	2060064	2059757	2060141	HiC_interaction_with_promoter-1
FOXM1-PKNOX1	ENSG00000065057	16	2059780	2060300	2059846	2060270	HiC_interaction_with_promoter-1
GATAD2B-RELA	ENSG00000065057	16	2059757	2060141	2059765	2060285	HiC_interaction_with_promoter-1
FOXM1-GATAD2B	ENSG00000065060	6	34724856	34725376	34759717	34760036	HiC_interaction_with_promoter-1
FOXM1-GATAD2B	ENSG00000065060	6	34724856	34725376	34759883	34760403	HiC_interaction_with_promoter-1
SRF-ZNF592	ENSG00000065060	6	34724995	34725375	34759747	34760031	HiC_interaction_with_promoter-1
ARID3A-GATAD2B	ENSG00000065060	6	34759746	34760096	34759717	34760036	HiC_interaction_with_promoter-1
ARID3A-GATAD2B	ENSG00000065060	6	34759746	34760096	34759883	34760403	HiC_interaction_with_promoter-1
ARID3A-GATAD2B	ENSG00000065060	6	34724919	34725269	34759717	34760036	HiC_interaction_with_promoter-1
ARID3A-GATAD2B	ENSG00000065060	6	34724919	34725269	34759883	34760403	HiC_interaction_with_promoter-1
ATF2-RELB	ENSG00000065060	6	34724765	34725668	34724775	34725295	HiC_interaction_with_promoter-1
ATF2-RELB	ENSG00000065060	6	34724765	34725672	34724775	34725295	HiC_interaction_with_promoter-1
FOXM1-GATAD2B	ENSG00000065135	1	110074907	110075427	110074834	110075354	HiC_interaction_with_promoter-1
ATF2-RELB	ENSG00000065135	1	110069622	110070324	110069836	110070356	HiC_interaction_with_promoter-1
ATF2-RELB	ENSG00000065135	1	110069622	110070324	110069844	110070348	HiC_interaction_with_promoter-1
CREM-RELA	ENSG00000065135	1	110069863	110070247	110074899	110075259	HiC_interaction_with_promoter-1
CREM-RELA	ENSG00000065135	1	110069863	110070247	110069885	110070245	HiC_interaction_with_promoter-1
RELB-ZNF592	ENSG00000065135	1	110069622	110070324	110069951	110070235	HiC_interaction_with_promoter-1
RELB-ZNF592	ENSG00000065135	1	110069622	110070324	110074967	110075251	HiC_interaction_with_promoter-1
FOXM1-PKNOX1	ENSG00000065135	1	110069869	110070389	110074962	110075168	HiC_interaction_with_promoter-1
FOXM1-PKNOX1	ENSG00000065135	1	110069869	110070389	110069871	110070262	HiC_interaction_with_promoter-1
FOXM1-PKNOX1	ENSG00000065135	1	110074834	110075354	110074962	110075168	HiC_interaction_with_promoter-1
RELB-STAT1	ENSG00000065135	1	110069622	110070324	110069721	110070085	HiC_interaction_with_promoter-1
EP300-TAF1	ENSG00000065243	1	89149744	89150114	89149924	89150026	HiC_interaction_with_promoter-1
EP300-TAF1	ENSG00000065243	1	89149744	89150114	89149876	89150095	HiC_interaction_with_promoter-1
EP300-TAF1	ENSG00000065243	1	89149755	89150115	89149924	89150026	HiC_interaction_with_promoter-1
EP300-TAF1	ENSG00000065243	1	89149755	89150115	89149876	89150095	HiC_interaction_with_promoter-1
ATF2-RELB	ENSG00000065268	19	954787	955276	954812	955332	HiC_interaction_with_promoter-1
ATF2-RELB	ENSG00000065268	19	954787	955308	954812	955332	HiC_interaction_with_promoter-1
FOXM1-PKNOX1	ENSG00000065268	19	954816	955336	954836	955260	HiC_interaction_with_promoter-1
EP300-TAF1	ENSG00000065268	19	954840	955180	954869	955239	HiC_interaction_with_promoter-1
EP300-TAF1	ENSG00000065268	19	954840	955180	954932	955288	HiC_interaction_with_promoter-1
EP300-TAF1	ENSG00000065268	19	954840	955180	954874	955234	HiC_interaction_with_promoter-1
EP300-TAF1	ENSG00000065268	19	954840	955180	954941	955291	HiC_interaction_with_promoter-1
EP300-TAF1	ENSG00000065268	19	954844	955180	954869	955239	HiC_interaction_with_promoter-1
EP300-TAF1	ENSG00000065268	19	954844	955180	954932	955288	HiC_interaction_with_promoter-1
EP300-TAF1	ENSG00000065268	19	954844	955180	954874	955234	HiC_interaction_with_promoter-1
EP300-TAF1	ENSG00000065268	19	954844	955180	954941	955291	HiC_interaction_with_promoter-1
ATF2-RELB	ENSG00000065357	12	56324500	56325004	56324851	56325451	HiC_interaction_with_promoter-1
ATF2-RELB	ENSG00000065357	12	56324833	56325337	56324851	56325451	HiC_interaction_with_promoter-1
ATF2-RELB	ENSG00000065357	12	56324814	56325334	56324851	56325451	HiC_interaction_with_promoter-1
ATF2-RELB	ENSG00000065413	2	197994899	197995499	198074690	198075210	HiC_interaction_with_promoter-1
ATF2-RELB	ENSG00000065413	2	197994899	197995499	198074691	198075195	HiC_interaction_with_promoter-1
RELB-SPI1	ENSG00000065413	2	197994899	197995499	198074764	198075040	HiC_interaction_with_promoter-1
RELB-STAT1	ENSG00000065518	3	120314684	120315048	120314979	120315579	HiC_interaction_with_promoter-1
ARID3A-GATAD2B	ENSG00000065526	1	16174677	16175086	16174804	16175154	HiC_interaction_with_promoter-1
RELB-SPI1	ENSG00000065526	1	16209459	16210059	16289862	16290138	HiC_interaction_with_promoter-1
EP300-TAF1	ENSG00000065883	7	39989704	39990040	39989686	39990036	HiC_interaction_with_promoter-1
EP300-TAF1	ENSG00000065883	7	39989702	39990042	39989686	39990036	HiC_interaction_with_promoter-1
MLLT1-RFX5	ENSG00000065883	7	39989706	39990042	39989853	39990131	HiC_interaction_with_promoter-1
MLLT1-RFX5	ENSG00000065883	7	39989706	39990042	39994679	39995255	HiC_interaction_with_promoter-1
FOXM1-GATAD2B	ENSG00000065989	19	10514905	10515425	10519689	10520209	HiC_interaction_with_promoter-1
FOXM1-GATAD2B	ENSG00000065989	19	10514905	10515425	10519485	10520005	HiC_interaction_with_promoter-1
FOXM1-GATAD2B	ENSG00000065989	19	10514905	10515425	10534836	10535356	HiC_interaction_with_promoter-1
FOXK2-MTA2	ENSG00000065989	19	10514637	10515047	10539644	10540204	HiC_interaction_with_promoter-1
FOXK2-MTA2	ENSG00000065989	19	10514637	10515047	10534672	10535232	HiC_interaction_with_promoter-1
MLLT1-RFX5	ENSG00000066136	1	41169629	41170205	41174746	41175082	HiC_interaction_with_promoter-1
MLLT1-RFX5	ENSG00000066136	1	41174885	41175461	41174746	41175082	HiC_interaction_with_promoter-1
MLLT1-RFX5	ENSG00000066136	1	41164447	41165023	41174746	41175082	HiC_interaction_with_promoter-1
RELB-ZNF622	ENSG00000066136	1	41174774	41175181	41174786	41175098	HiC_interaction_with_promoter-1
RELB-ZNF622	ENSG00000066136	1	41174774	41175210	41174786	41175098	HiC_interaction_with_promoter-1
ATF2-RELB	ENSG00000066136	1	41174774	41175181	41174696	41175106	HiC_interaction_with_promoter-1
ATF2-RELB	ENSG00000066136	1	41174774	41175210	41174696	41175106	HiC_interaction_with_promoter-1
RELB-ZNF592	ENSG00000066136	1	41174774	41175181	41229793	41230077	HiC_interaction_with_promoter-1
RELB-ZNF592	ENSG00000066136	1	41174774	41175210	41229793	41230077	HiC_interaction_with_promoter-1
MAZ-PBX3	ENSG00000066136	1	41174823	41175000	41174799	41175235	HiC_interaction_with_promoter-1
MAZ-PBX3	ENSG00000066136	1	41174823	41175000	41174805	41175229	HiC_interaction_with_promoter-1
MAZ-PBX3	ENSG00000066136	1	41174832	41175004	41174799	41175235	HiC_interaction_with_promoter-1
MAZ-PBX3	ENSG00000066136	1	41174832	41175004	41174805	41175229	HiC_interaction_with_promoter-1
FOXM1-PKNOX1	ENSG00000066136	1	41174290	41175196	41229666	41230186	HiC_interaction_with_promoter-1
FOXM1-PKNOX1	ENSG00000066136	1	41174290	41175196	41174520	41175040	HiC_interaction_with_promoter-1
ATF2-ESRRA	ENSG00000066136	1	41174696	41175106	41174707	41175071	HiC_interaction_with_promoter-1
RELB-SPI1	ENSG00000066136	1	41174774	41175181	41229791	41230067	HiC_interaction_with_promoter-1
RELB-SPI1	ENSG00000066136	1	41174774	41175210	41229791	41230067	HiC_interaction_with_promoter-1
RELB-SPI1	ENSG00000066294	1	160544785	160545385	160544929	160545205	HiC_interaction_with_promoter-1
RELB-SPI1	ENSG00000066294	1	160489591	160490191	160544929	160545205	HiC_interaction_with_promoter-1
ATF2-RELB	ENSG00000066294	1	160574968	160575488	160574820	160575420	HiC_interaction_with_promoter-1
ATF2-RELB	ENSG00000066294	1	160574968	160575488	160574455	160575055	HiC_interaction_with_promoter-1
FOXM1-GATAD2B	ENSG00000066336	11	47429595	47430115	47429591	47430145	HiC_interaction_with_promoter-1
MLLT1-RFX5	ENSG00000066336	11	47399877	47400213	47399984	47400560	HiC_interaction_with_promoter-1
ATF2-NRF1	ENSG00000066336	11	47399993	47400243	47429564	47430084	HiC_interaction_with_promoter-1
ATF2-NRF1	ENSG00000066336	11	47399993	47400243	47399944	47400354	HiC_interaction_with_promoter-1
ESRRA-JUND	ENSG00000066336	11	47399987	47400271	47429817	47430181	HiC_interaction_with_promoter-1
SRF-ZNF592	ENSG00000066336	11	47429859	47430143	47429884	47430140	HiC_interaction_with_promoter-1
SRF-ZNF592	ENSG00000066336	11	47429859	47430143	47429915	47430121	HiC_interaction_with_promoter-1
SRF-ZNF592	ENSG00000066336	11	47429859	47430143	47429983	47430048	HiC_interaction_with_promoter-1
ARID3A-GATAD2B	ENSG00000066336	11	47399866	47400386	47429678	47430028	HiC_interaction_with_promoter-1
ARID3A-GATAD2B	ENSG00000066336	11	47429591	47430145	47429678	47430028	HiC_interaction_with_promoter-1
JUND-ZNF24	ENSG00000066336	11	47399987	47400271	47429930	47430098	HiC_interaction_with_promoter-1
ATF2-ESRRA	ENSG00000066336	11	47429564	47430084	47429817	47430181	HiC_interaction_with_promoter-1
ATF2-ESRRA	ENSG00000066336	11	47399944	47400354	47429817	47430181	HiC_interaction_with_promoter-1
EP300-TAF1	ENSG00000066336	11	47429839	47430179	47429862	47430142	HiC_interaction_with_promoter-1
EP300-TAF1	ENSG00000066336	11	47429839	47430179	47429866	47430136	HiC_interaction_with_promoter-1
EP300-TAF1	ENSG00000066336	11	47429859	47430195	47429862	47430142	HiC_interaction_with_promoter-1
EP300-TAF1	ENSG00000066336	11	47429859	47430195	47429866	47430136	HiC_interaction_with_promoter-1
ATF2-JUND	ENSG00000066336	11	47399987	47400271	47429564	47430084	HiC_interaction_with_promoter-1
ATF2-JUND	ENSG00000066336	11	47399987	47400271	47399944	47400354	HiC_interaction_with_promoter-1
GATAD2B-PBX3	ENSG00000066923	7	99774985	99775201	99814816	99815336	HiC_interaction_with_promoter-1
GATAD2B-PBX3	ENSG00000066933	15	72074854	72075070	72409749	72410269	HiC_interaction_with_promoter-1
GATAD2B-PBX3	ENSG00000066933	15	72074854	72075070	72409953	72410473	HiC_interaction_with_promoter-1
GATAD2B-PBX3	ENSG00000066933	15	72074851	72075071	72409749	72410269	HiC_interaction_with_promoter-1
GATAD2B-PBX3	ENSG00000066933	15	72074851	72075071	72409953	72410473	HiC_interaction_with_promoter-1
GATAD2B-RELA	ENSG00000066933	15	72229997	72230381	72409749	72410269	HiC_interaction_with_promoter-1
GATAD2B-RELA	ENSG00000066933	15	72229997	72230381	72409953	72410473	HiC_interaction_with_promoter-1
EP300-TAF1	ENSG00000067064	10	1094861	1095231	1094895	1095235	HiC_interaction_with_promoter-1
EP300-TAF1	ENSG00000067064	10	1094861	1095231	1094890	1095226	HiC_interaction_with_promoter-1
EP300-TAF1	ENSG00000067064	10	1094867	1095227	1094895	1095235	HiC_interaction_with_promoter-1
EP300-TAF1	ENSG00000067064	10	1094867	1095227	1094890	1095226	HiC_interaction_with_promoter-1
EP300-TAF1	ENSG00000067082	10	3799743	3800113	3824706	3825042	HiC_interaction_with_promoter-1
EP300-TAF1	ENSG00000067082	10	3799743	3800113	3824809	3825149	HiC_interaction_with_promoter-1
EP300-TAF1	ENSG00000067082	10	3799743	3800113	3824928	3825264	HiC_interaction_with_promoter-1
EP300-TAF1	ENSG00000067082	10	3799748	3800108	3824706	3825042	HiC_interaction_with_promoter-1
EP300-TAF1	ENSG00000067082	10	3799748	3800108	3824809	3825149	HiC_interaction_with_promoter-1
EP300-TAF1	ENSG00000067082	10	3799748	3800108	3824928	3825264	HiC_interaction_with_promoter-1
ARID3A-GATAD2B	ENSG00000067167	8	71519854	71520204	71519918	71520220	HiC_interaction_with_promoter-1
FOXM1-GATAD2B	ENSG00000067182	12	6444857	6445377	6444805	6445325	HiC_interaction_with_promoter-1
FOXM1-GATAD2B	ENSG00000067182	12	6419547	6420067	6444805	6445325	HiC_interaction_with_promoter-1
FOXK2-MTA2	ENSG00000067182	12	6444762	6445322	6444853	6445263	HiC_interaction_with_promoter-1
EP300-PBX3	ENSG00000067182	12	6444929	6445199	6444865	6445085	HiC_interaction_with_promoter-1
EP300-PBX3	ENSG00000067182	12	6444929	6445199	6444873	6445089	HiC_interaction_with_promoter-1
EP300-PBX3	ENSG00000067182	12	6444930	6445280	6444865	6445085	HiC_interaction_with_promoter-1
EP300-PBX3	ENSG00000067182	12	6444930	6445280	6444873	6445089	HiC_interaction_with_promoter-1
EP300-TAF1	ENSG00000067182	12	6444929	6445199	6444868	6445204	HiC_interaction_with_promoter-1
EP300-TAF1	ENSG00000067182	12	6444929	6445199	6444878	6445218	HiC_interaction_with_promoter-1
EP300-TAF1	ENSG00000067182	12	6444930	6445280	6444868	6445204	HiC_interaction_with_promoter-1
EP300-TAF1	ENSG00000067182	12	6444930	6445280	6444878	6445218	HiC_interaction_with_promoter-1
RELB-SPI1	ENSG00000067182	12	6444885	6445161	6449581	6450181	HiC_interaction_with_promoter-1
MAZ-PBX3	ENSG00000067182	12	6444865	6445085	6444814	6445238	HiC_interaction_with_promoter-1
MAZ-PBX3	ENSG00000067182	12	6444865	6445085	6444808	6445244	HiC_interaction_with_promoter-1
MAZ-PBX3	ENSG00000067182	12	6444873	6445089	6444814	6445238	HiC_interaction_with_promoter-1
MAZ-PBX3	ENSG00000067182	12	6444873	6445089	6444808	6445244	HiC_interaction_with_promoter-1
GATAD2B-PBX3	ENSG00000067182	12	6444857	6445377	6444865	6445085	HiC_interaction_with_promoter-1
GATAD2B-PBX3	ENSG00000067182	12	6444857	6445377	6444873	6445089	HiC_interaction_with_promoter-1
GATAD2B-PBX3	ENSG00000067182	12	6419547	6420067	6444865	6445085	HiC_interaction_with_promoter-1
GATAD2B-PBX3	ENSG00000067182	12	6419547	6420067	6444873	6445089	HiC_interaction_with_promoter-1
ATF2-NRF1	ENSG00000067191	17	37309973	37310223	37309787	37310291	HiC_interaction_with_promoter-1
ATF2-NRF1	ENSG00000067191	17	37309988	37310238	37309787	37310291	HiC_interaction_with_promoter-1
ASH2L-MAZ	ENSG00000067191	17	37309900	37310324	37309914	37310498	HiC_interaction_with_promoter-1
ASH2L-MAZ	ENSG00000067191	17	37309894	37310330	37309914	37310498	HiC_interaction_with_promoter-1
MLLT1-RFX5	ENSG00000067221	15	74284640	74285216	74284694	74285030	HiC_interaction_with_promoter-1
MLLT1-RFX5	ENSG00000067334	1	94344642	94345218	94344676	94345012	HiC_interaction_with_promoter-1
ASH2L-MAZ	ENSG00000067334	1	94344636	94345060	94374726	94375310	HiC_interaction_with_promoter-1
ASH2L-MAZ	ENSG00000067334	1	94344624	94345060	94374726	94375310	HiC_interaction_with_promoter-1
MLLT1-RFX5	ENSG00000068001	3	50329909	50330485	50374748	50375084	HiC_interaction_with_promoter-1
ATF2-NRF1	ENSG00000068001	3	50329849	50330099	50374815	50375085	HiC_interaction_with_promoter-1
ATF2-NRF1	ENSG00000068001	3	50329849	50330099	50374803	50375094	HiC_interaction_with_promoter-1
ATF2-JUND	ENSG00000068001	3	50374819	50375103	50374815	50375085	HiC_interaction_with_promoter-1
ATF2-JUND	ENSG00000068001	3	50374819	50375103	50374803	50375094	HiC_interaction_with_promoter-1
ATF2-JUND	ENSG00000068028	3	50374819	50375103	50374815	50375085	HiC_interaction_with_promoter-1
ATF2-JUND	ENSG00000068028	3	50374819	50375103	50374803	50375094	HiC_interaction_with_promoter-1
FOXM1-GATAD2B	ENSG00000068120	17	40729482	40730002	40729640	40730160	HiC_interaction_with_promoter-1
MLLT1-RFX5	ENSG00000068120	17	40684460	40685036	40729736	40730072	HiC_interaction_with_promoter-1
RELB-STAT1	ENSG00000068120	17	40729655	40730019	40729850	40730104	HiC_interaction_with_promoter-1
EP300-TAF1	ENSG00000068697	2	20249978	20250318	20249981	20250351	HiC_interaction_with_promoter-1
EP300-TAF1	ENSG00000068697	2	20249978	20250318	20249992	20250352	HiC_interaction_with_promoter-1
JUND-RELB	ENSG00000068724	2	47144915	47145199	47144673	47145273	HiC_interaction_with_promoter-1
ATF2-RELB	ENSG00000068724	2	47144736	47145240	47144673	47145273	HiC_interaction_with_promoter-1
ATF2-RELB	ENSG00000068724	2	47144723	47145243	47144673	47145273	HiC_interaction_with_promoter-1
ARID3A-GATAD2B	ENSG00000068724	2	47144804	47145154	47299769	47300289	HiC_interaction_with_promoter-1
FOXK2-MTA2	ENSG00000068724	2	47144722	47145132	47144728	47145294	HiC_interaction_with_promoter-1
FOXK2-MTA2	ENSG00000068724	2	47144722	47145132	47299788	47300348	HiC_interaction_with_promoter-1
ATF2-JUND	ENSG00000068724	2	47144915	47145199	47144736	47145240	HiC_interaction_with_promoter-1
ATF2-JUND	ENSG00000068724	2	47144915	47145199	47144723	47145243	HiC_interaction_with_promoter-1
GATAD2B-PBX3	ENSG00000068903	19	39339955	39340171	39359613	39360133	HiC_interaction_with_promoter-1
RELB-SPI1	ENSG00000068903	19	39339683	39340062	39354982	39355180	HiC_interaction_with_promoter-1
RELB-SPI1	ENSG00000068903	19	39339683	39340062	39359910	39360186	HiC_interaction_with_promoter-1
RELB-SPI1	ENSG00000068903	19	39359846	39360446	39359910	39360186	HiC_interaction_with_promoter-1
RELB-SPI1	ENSG00000068903	19	39339683	39340069	39354982	39355180	HiC_interaction_with_promoter-1
RELB-SPI1	ENSG00000068903	19	39339683	39340069	39359910	39360186	HiC_interaction_with_promoter-1
ATF2-NRF1	ENSG00000068912	2	53994638	53995142	53994788	53995038	HiC_interaction_with_promoter-1
ASH2L-MAZ	ENSG00000068912	2	53994833	53995417	53994689	53995113	HiC_interaction_with_promoter-1
MAZ-PBX3	ENSG00000068912	2	53994890	53995110	53994689	53995113	HiC_interaction_with_promoter-1
MAZ-PBX3	ENSG00000068912	2	53994899	53995115	53994689	53995113	HiC_interaction_with_promoter-1
ATF2-RELB	ENSG00000068912	2	53994638	53995142	53994401	53995001	HiC_interaction_with_promoter-1
RELB-STAT1	ENSG00000068912	2	53994401	53995001	53994636	53995000	HiC_interaction_with_promoter-1
ATF2-RELB	ENSG00000068971	11	64644699	64645299	64644768	64645272	HiC_interaction_with_promoter-1
ATF2-RELB	ENSG00000068971	11	64644699	64645299	64644776	64645296	HiC_interaction_with_promoter-1
ATF2-RELB	ENSG00000068971	11	64644903	64645503	64644768	64645272	HiC_interaction_with_promoter-1
ATF2-RELB	ENSG00000068971	11	64644903	64645503	64644776	64645296	HiC_interaction_with_promoter-1
EP300-TAF1	ENSG00000068971	11	64644854	64645204	64644944	64645284	HiC_interaction_with_promoter-1
EP300-TAF1	ENSG00000068971	11	64644854	64645204	64644945	64645281	HiC_interaction_with_promoter-1
RELB-STAT1	ENSG00000068971	11	64684679	64685043	64684801	64685203	HiC_interaction_with_promoter-1
ATF2-RELB	ENSG00000068976	11	64539953	64540553	64539873	64540134	HiC_interaction_with_promoter-1
ATF2-RELB	ENSG00000068976	11	64539953	64540553	64539955	64540459	HiC_interaction_with_promoter-1
ATF2-RELB	ENSG00000068976	11	64539953	64540553	64544802	64545306	HiC_interaction_with_promoter-1
JUND-RELB	ENSG00000069345	16	46944891	46945175	47009961	47010561	HiC_interaction_with_promoter-1
JUND-RELB	ENSG00000069345	16	46944891	46945175	47009755	47010355	HiC_interaction_with_promoter-1
ATF2-RELB	ENSG00000069345	16	47009961	47010561	47009788	47010198	HiC_interaction_with_promoter-1
ATF2-RELB	ENSG00000069345	16	47009961	47010561	47009791	47010295	HiC_interaction_with_promoter-1
ATF2-RELB	ENSG00000069345	16	46944731	46945331	47009788	47010198	HiC_interaction_with_promoter-1
ATF2-RELB	ENSG00000069345	16	46944731	46945331	47009791	47010295	HiC_interaction_with_promoter-1
ATF2-RELB	ENSG00000069345	16	47009755	47010355	47009788	47010198	HiC_interaction_with_promoter-1
ATF2-RELB	ENSG00000069345	16	47009755	47010355	47009791	47010295	HiC_interaction_with_promoter-1
ATF2-JUND	ENSG00000069345	16	46944891	46945175	47009788	47010198	HiC_interaction_with_promoter-1
ATF2-JUND	ENSG00000069345	16	46944891	46945175	47009791	47010295	HiC_interaction_with_promoter-1
EP300-TAF1	ENSG00000069399	19	45239975	45240311	45239974	45240344	HiC_interaction_with_promoter-1
FOXM1-GATAD2B	ENSG00000069812	1	6474511	6475031	6485000	6485520	HiC_interaction_with_promoter-1
FOXM1-GATAD2B	ENSG00000069812	1	6474511	6475031	6484897	6485078	HiC_interaction_with_promoter-1
FOXM1-PKNOX1	ENSG00000069812	1	6474511	6475031	6474578	6475002	HiC_interaction_with_promoter-1
FOXM1-PKNOX1	ENSG00000069812	1	6474511	6475031	6504679	6505103	HiC_interaction_with_promoter-1
FOXM1-PKNOX1	ENSG00000069966	15	52374784	52375304	52474695	52475119	HiC_interaction_with_promoter-1
ATF2-RELB	ENSG00000069974	15	55509719	55510223	55514633	55515233	HiC_interaction_with_promoter-1
ATF2-RELB	ENSG00000069974	15	55514746	55515250	55514633	55515233	HiC_interaction_with_promoter-1
RELB-SPI1	ENSG00000069974	15	55514901	55515177	55514633	55515233	HiC_interaction_with_promoter-1
ARID3A-GATAD2B	ENSG00000069998	22	17639972	17640196	17639912	17640262	HiC_interaction_with_promoter-1
ATF2-RELB	ENSG00000070159	9	112184801	112185401	112184841	112185361	HiC_interaction_with_promoter-1
EP300-PBX3	ENSG00000070159	9	112184912	112185282	112184973	112185193	HiC_interaction_with_promoter-1
EP300-PBX3	ENSG00000070159	9	112184943	112185223	112184973	112185193	HiC_interaction_with_promoter-1
EP300-PBX3	ENSG00000070159	9	112184911	112185271	112184973	112185193	HiC_interaction_with_promoter-1
EP300-PBX3	ENSG00000070159	9	112184949	112185299	112184973	112185193	HiC_interaction_with_promoter-1
MAZ-PBX3	ENSG00000070159	9	112184634	112185070	112184973	112185193	HiC_interaction_with_promoter-1
MAZ-PBX3	ENSG00000070159	9	112184637	112185061	112184973	112185193	HiC_interaction_with_promoter-1
GATAD2B-RELA	ENSG00000070159	9	112184846	112185230	112239823	112240343	HiC_interaction_with_promoter-1
ATF2-RELB	ENSG00000070190	4	100769542	100770142	100769653	100770157	HiC_interaction_with_promoter-1
ATF2-RELB	ENSG00000070190	4	100769542	100770142	100769645	100770165	HiC_interaction_with_promoter-1
CREM-RELA	ENSG00000070190	4	100769702	100770086	100769711	100770071	HiC_interaction_with_promoter-1
EP300-TAF1	ENSG00000070190	4	100769708	100770078	100769667	100770007	HiC_interaction_with_promoter-1
EP300-TAF1	ENSG00000070190	4	100769708	100770078	100769813	100770149	HiC_interaction_with_promoter-1
EP300-TAF1	ENSG00000070190	4	100769713	100770073	100769667	100770007	HiC_interaction_with_promoter-1
EP300-TAF1	ENSG00000070190	4	100769713	100770073	100769813	100770149	HiC_interaction_with_promoter-1
EP300-TAF1	ENSG00000070190	4	100769782	100770132	100769667	100770007	HiC_interaction_with_promoter-1
EP300-TAF1	ENSG00000070190	4	100769782	100770132	100769813	100770149	HiC_interaction_with_promoter-1
EP300-TAF1	ENSG00000070190	4	100769646	100770002	100769667	100770007	HiC_interaction_with_promoter-1
EP300-TAF1	ENSG00000070190	4	100769646	100770002	100769813	100770149	HiC_interaction_with_promoter-1
FOXM1-GATAD2B	ENSG00000070404	19	674911	675431	674614	675134	HiC_interaction_with_promoter-1
FOXM1-GATAD2B	ENSG00000070404	19	664902	665422	664797	665317	HiC_interaction_with_promoter-1
FOXM1-GATAD2B	ENSG00000070404	19	664902	665422	674614	675134	HiC_interaction_with_promoter-1
RELB-ZNF592	ENSG00000070404	19	664911	665195	664976	665190	HiC_interaction_with_promoter-1
GATAD2B-RELA	ENSG00000070404	19	664902	665422	664860	665244	HiC_interaction_with_promoter-1
RELB-STAT1	ENSG00000070404	19	664856	665220	664976	665190	HiC_interaction_with_promoter-1
GATAD2B-PBX3	ENSG00000070444	17	2299613	2300133	2304812	2305028	HiC_interaction_with_promoter-1
ARID3A-GATAD2B	ENSG00000070444	17	2299613	2300133	2304977	2305327	HiC_interaction_with_promoter-1
GATAD2B-RELA	ENSG00000070444	17	2299613	2300133	2304786	2305170	HiC_interaction_with_promoter-1
FOXM1-PKNOX1	ENSG00000070476	3	126149936	126150360	126149977	126150497	HiC_interaction_with_promoter-1
ARID3A-GATAD2B	ENSG00000070756	8	101734665	101735015	101734792	101735312	HiC_interaction_with_promoter-1
GATAD2B-RELA	ENSG00000070759	1	45769651	45770171	45769979	45770363	HiC_interaction_with_promoter-1
FOXM1-GATAD2B	ENSG00000070831	1	22379712	22380232	22379880	22380400	HiC_interaction_with_promoter-1
JUND-RELB	ENSG00000070831	1	22379835	22380435	22379968	22380252	HiC_interaction_with_promoter-1
ATF2-RELB	ENSG00000070831	1	22379835	22380435	22379884	22380404	HiC_interaction_with_promoter-1
ATF2-RELB	ENSG00000070831	1	22379835	22380435	22379897	22380401	HiC_interaction_with_promoter-1
ATF2-RELB	ENSG00000070831	1	22379835	22380435	22379899	22380382	HiC_interaction_with_promoter-1
ATF2-JUND	ENSG00000070831	1	22379884	22380404	22379968	22380252	HiC_interaction_with_promoter-1
ATF2-JUND	ENSG00000070831	1	22379897	22380401	22379968	22380252	HiC_interaction_with_promoter-1
ATF2-JUND	ENSG00000070831	1	22379899	22380382	22379968	22380252	HiC_interaction_with_promoter-1
MLLT1-RFX5	ENSG00000070882	7	25019872	25020448	25019787	25020123	HiC_interaction_with_promoter-1
MAZ-PBX3	ENSG00000070882	7	25019628	25020064	25019818	25020018	HiC_interaction_with_promoter-1
MAZ-PBX3	ENSG00000070882	7	25019628	25020064	25019813	25020020	HiC_interaction_with_promoter-1
MAZ-PBX3	ENSG00000070882	7	25019633	25020057	25019818	25020018	HiC_interaction_with_promoter-1
MAZ-PBX3	ENSG00000070882	7	25019633	25020057	25019813	25020020	HiC_interaction_with_promoter-1
ATF2-RELB	ENSG00000070915	16	56904972	56905476	56974861	56975461	HiC_interaction_with_promoter-1
RELB-STAT1	ENSG00000070950	3	8809693	8810057	9004887	9005317	HiC_interaction_with_promoter-1
RELB-STAT1	ENSG00000070950	3	9004802	9005232	9004887	9005317	HiC_interaction_with_promoter-1
RELB-STAT1	ENSG00000070950	3	9004987	9005351	9004887	9005317	HiC_interaction_with_promoter-1
ARID3A-GATAD2B	ENSG00000071189	7	17979795	17980315	17979974	17980324	HiC_interaction_with_promoter-1
ARID3A-GATAD2B	ENSG00000071909	2	171034938	171035458	171034975	171035325	HiC_interaction_with_promoter-1
ARID3A-GATAD2B	ENSG00000071909	2	171034594	171035114	171034975	171035325	HiC_interaction_with_promoter-1
RELB-SPI1	ENSG00000071909	2	171034593	171035193	171084978	171085254	HiC_interaction_with_promoter-1
FOXM1-PKNOX1	ENSG00000072062	19	14224775	14225199	14224814	14225334	HiC_interaction_with_promoter-1
RELB-STAT1	ENSG00000072135	2	131099999	131100363	131099572	131100340	HiC_interaction_with_promoter-1
RELB-STAT1	ENSG00000072135	2	131094640	131095004	131094452	131095052	HiC_interaction_with_promoter-1
RELB-STAT1	ENSG00000072135	2	131094640	131095004	131099572	131100340	HiC_interaction_with_promoter-1
FOXM1-PKNOX1	ENSG00000072518	11	63604623	63605143	63604842	63605266	HiC_interaction_with_promoter-1
RELB-STAT1	ENSG00000072518	11	63639432	63640032	63684664	63685094	HiC_interaction_with_promoter-1
FOXM1-PKNOX1	ENSG00000072736	16	68104723	68105147	68104662	68105182	HiC_interaction_with_promoter-1
FOXM1-GATAD2B	ENSG00000072786	5	171614819	171615339	171614675	171615195	HiC_interaction_with_promoter-1
FOXM1-GATAD2B	ENSG00000072786	5	171614605	171615125	171614675	171615195	HiC_interaction_with_promoter-1
FOXM1-GATAD2B	ENSG00000072786	5	171429886	171430406	171614675	171615195	HiC_interaction_with_promoter-1
ARID3A-GATAD2B	ENSG00000072786	5	171429845	171430195	171614819	171615339	HiC_interaction_with_promoter-1
ARID3A-GATAD2B	ENSG00000072786	5	171429845	171430195	171614605	171615125	HiC_interaction_with_promoter-1
FOXM1-PKNOX1	ENSG00000072786	5	171429981	171430405	171614675	171615195	HiC_interaction_with_promoter-1
FOXM1-GATAD2B	ENSG00000072803	5	171404917	171405437	171429886	171430406	HiC_interaction_with_promoter-1
ARID3A-GATAD2B	ENSG00000072803	5	171384838	171385188	171429886	171430406	HiC_interaction_with_promoter-1
ARID3A-GATAD2B	ENSG00000072803	5	171429845	171430195	171429886	171430406	HiC_interaction_with_promoter-1
FOXM1-PKNOX1	ENSG00000072803	5	171404917	171405437	171429981	171430405	HiC_interaction_with_promoter-1
FOXM1-PKNOX1	ENSG00000072849	17	5389516	5390126	5389857	5390377	HiC_interaction_with_promoter-1
FOXM1-PKNOX1	ENSG00000072849	17	5389516	5390126	5389658	5390178	HiC_interaction_with_promoter-1
ATF2-RELB	ENSG00000072858	3	113254660	113255070	113254568	113255168	HiC_interaction_with_promoter-1
FOXM1-GATAD2B	ENSG00000073060	12	125369623	125370143	125404584	125405104	HiC_interaction_with_promoter-1
ASH2L-MAZ	ENSG00000073067	7	1014693	1015277	1039836	1040272	HiC_interaction_with_promoter-1
ASH2L-MAZ	ENSG00000073067	7	1014693	1015277	1039914	1040338	HiC_interaction_with_promoter-1
ASH2L-MAZ	ENSG00000073067	7	1014693	1015277	1014997	1015433	HiC_interaction_with_promoter-1
ASH2L-MAZ	ENSG00000073067	7	1014693	1015277	1014968	1015392	HiC_interaction_with_promoter-1
EP300-TAF1	ENSG00000073067	7	1014947	1015287	1039782	1040152	HiC_interaction_with_promoter-1
EP300-TAF1	ENSG00000073067	7	1014955	1015291	1039782	1040152	HiC_interaction_with_promoter-1
RELB-STAT1	ENSG00000073067	7	1014793	1015157	1014978	1015191	HiC_interaction_with_promoter-1
ARID3A-GATAD2B	ENSG00000073111	3	127309818	127310168	127310000	127310520	HiC_interaction_with_promoter-1
ARID3A-GATAD2B	ENSG00000073111	3	127309818	127310168	127309869	127310211	HiC_interaction_with_promoter-1
EP300-PBX3	ENSG00000073111	3	127309788	127310004	127309846	127310206	HiC_interaction_with_promoter-1
EP300-PBX3	ENSG00000073111	3	127309788	127310004	127309843	127310213	HiC_interaction_with_promoter-1
RELB-ZNF592	ENSG00000073111	3	127309866	127310150	127309267	127310018	HiC_interaction_with_promoter-1
RELB-STAT1	ENSG00000073111	3	127309267	127310018	127309907	127310271	HiC_interaction_with_promoter-1
GATAD2B-PBX3	ENSG00000073111	3	127309788	127310004	127310000	127310520	HiC_interaction_with_promoter-1
GATAD2B-PBX3	ENSG00000073111	3	127309788	127310004	127309869	127310211	HiC_interaction_with_promoter-1
CREM-RELA	ENSG00000073282	3	189304953	189305337	189364858	189365218	HiC_interaction_with_promoter-1
ATF2-RELB	ENSG00000073282	3	189304784	189305384	189349908	189350412	HiC_interaction_with_promoter-1
ATF2-RELB	ENSG00000073282	3	189304784	189305384	189364865	189365385	HiC_interaction_with_promoter-1
ATF2-RELB	ENSG00000073849	3	186739881	186740056	186759621	186760141	HiC_interaction_with_promoter-1
ATF2-RELB	ENSG00000073849	3	186739881	186740056	186759830	186760334	HiC_interaction_with_promoter-1
ATF2-RELB	ENSG00000073849	3	186739881	186740056	186759614	186760118	HiC_interaction_with_promoter-1
RELB-STAT1	ENSG00000074219	19	49834638	49835238	49834824	49835188	HiC_interaction_with_promoter-1
JUND-RELB	ENSG00000074276	5	175963952	175965303	175964742	175965026	HiC_interaction_with_promoter-1
RELB-SPI1	ENSG00000074276	5	175963952	175965303	175964815	175965091	HiC_interaction_with_promoter-1
ATF2-RELB	ENSG00000074276	5	175963952	175965303	175964751	175965015	HiC_interaction_with_promoter-1
ATF2-RELB	ENSG00000074276	5	175963952	175965303	175964751	175965018	HiC_interaction_with_promoter-1
ATF2-RELB	ENSG00000074276	5	175963952	175965303	175964598	175965206	HiC_interaction_with_promoter-1
MLLT1-RFX5	ENSG00000074276	5	175964437	175965013	175964863	175965199	HiC_interaction_with_promoter-1
FOXM1-GATAD2B	ENSG00000074696	15	65809787	65810015	65809813	65810333	HiC_interaction_with_promoter-1
MLLT1-RFX5	ENSG00000074696	15	65809911	65810247	65809716	65810292	HiC_interaction_with_promoter-1
MLLT1-RFX5	ENSG00000074696	15	65809911	65810247	65809916	65810492	HiC_interaction_with_promoter-1
MLLT1-RFX5	ENSG00000074696	15	65809938	65810274	65809716	65810292	HiC_interaction_with_promoter-1
MLLT1-RFX5	ENSG00000074696	15	65809938	65810274	65809916	65810492	HiC_interaction_with_promoter-1
SRF-ZNF592	ENSG00000074696	15	65809962	65810246	65809942	65810166	HiC_interaction_with_promoter-1
SRF-ZNF592	ENSG00000074696	15	65809962	65810246	65809957	65810157	HiC_interaction_with_promoter-1
RELB-ZNF592	ENSG00000074696	15	65809772	65810204	65809962	65810246	HiC_interaction_with_promoter-1
ASH2L-MAZ	ENSG00000074696	15	65809765	65810110	65809878	65810302	HiC_interaction_with_promoter-1
ASH2L-MAZ	ENSG00000074696	15	65809765	65810110	65809872	65810308	HiC_interaction_with_promoter-1
RELB-SPI1	ENSG00000074696	15	65809772	65810204	65809882	65810158	HiC_interaction_with_promoter-1
RELB-STAT1	ENSG00000074696	15	65809772	65810204	65809854	65810218	HiC_interaction_with_promoter-1
ATF2-RELB	ENSG00000074800	1	8889439	8890039	8939574	8940094	HiC_interaction_with_promoter-1
ATF2-RELB	ENSG00000074800	1	8889439	8890039	8939566	8940070	HiC_interaction_with_promoter-1
RELB-SPI1	ENSG00000075391	1	178069696	178070296	178114785	178115061	HiC_interaction_with_promoter-1
RELB-SPI1	ENSG00000075391	1	178069491	178070091	178114785	178115061	HiC_interaction_with_promoter-1
RELB-ZNF592	ENSG00000075624	7	5534433	5535033	5594935	5595219	HiC_interaction_with_promoter-1
ASH2L-MAZ	ENSG00000075624	7	5569828	5570412	5609733	5610169	HiC_interaction_with_promoter-1
ASH2L-MAZ	ENSG00000075624	7	5569828	5570412	5609739	5610163	HiC_interaction_with_promoter-1
ASH2L-MAZ	ENSG00000075624	7	5569828	5570412	5594863	5595299	HiC_interaction_with_promoter-1
ASH2L-MAZ	ENSG00000075624	7	5569828	5570412	5594865	5595289	HiC_interaction_with_promoter-1
FOXM1-GATAD2B	ENSG00000075651	3	171284539	171285059	171519600	171520120	HiC_interaction_with_promoter-1
ARID3A-GATAD2B	ENSG00000075651	3	171284691	171285041	171519600	171520120	HiC_interaction_with_promoter-1
CREM-RELA	ENSG00000075651	3	171279705	171280065	171519794	171520178	HiC_interaction_with_promoter-1
RELB-ZNF592	ENSG00000075651	3	171519741	171520025	171519715	171520536	HiC_interaction_with_promoter-1
FOXM1-PKNOX1	ENSG00000075651	3	171284539	171285059	171514949	171515373	HiC_interaction_with_promoter-1
GATAD2B-RELA	ENSG00000075651	3	171519794	171520178	171519600	171520120	HiC_interaction_with_promoter-1
ATF2-RELB	ENSG00000075651	3	171519864	171520368	171519715	171520536	HiC_interaction_with_promoter-1
ATF2-RELB	ENSG00000075651	3	171519654	171520158	171519715	171520536	HiC_interaction_with_promoter-1
SMAD1-ZNF592	ENSG00000075651	3	171519741	171520025	171519650	171520034	HiC_interaction_with_promoter-1
ARID3A-GATAD2B	ENSG00000075711	3	196729624	196730223	197024659	197025009	HiC_interaction_with_promoter-1
RELB-STAT1	ENSG00000075711	3	196794866	196795466	197024702	197025132	HiC_interaction_with_promoter-1
FOXM1-GATAD2B	ENSG00000075785	3	128444953	128445473	128564642	128565162	HiC_interaction_with_promoter-1
ATF2-RELB	ENSG00000075785	3	128444652	128445156	128444429	128445029	HiC_interaction_with_promoter-1
ATF2-RELB	ENSG00000075785	3	128444520	128445040	128444429	128445029	HiC_interaction_with_promoter-1
RELB-SPI1	ENSG00000075785	3	128444870	128445146	128444429	128445029	HiC_interaction_with_promoter-1
RELB-STAT1	ENSG00000075785	3	128399925	128400289	128444429	128445029	HiC_interaction_with_promoter-1
FOXM1-GATAD2B	ENSG00000075856	12	108959909	108960429	108959781	108960301	HiC_interaction_with_promoter-1
FOXM1-GATAD2B	ENSG00000075856	12	108959710	108960230	108959781	108960301	HiC_interaction_with_promoter-1
ASH2L-JUND	ENSG00000075856	12	108934881	108935465	108959865	108960149	HiC_interaction_with_promoter-1
JUND-RELB	ENSG00000075856	12	108954658	108955251	108959865	108960149	HiC_interaction_with_promoter-1
JUND-RELB	ENSG00000075856	12	108934961	108935385	108959865	108960149	HiC_interaction_with_promoter-1
JUND-RELB	ENSG00000075856	12	108954658	108955256	108959865	108960149	HiC_interaction_with_promoter-1
ATF2-RELB	ENSG00000075856	12	108954831	108955335	108954658	108955251	HiC_interaction_with_promoter-1
ATF2-RELB	ENSG00000075856	12	108954831	108955335	108954658	108955256	HiC_interaction_with_promoter-1
ATF2-RELB	ENSG00000075856	12	108954854	108955374	108954658	108955251	HiC_interaction_with_promoter-1
ATF2-RELB	ENSG00000075856	12	108954854	108955374	108954658	108955256	HiC_interaction_with_promoter-1
SMAD1-ZNF592	ENSG00000075856	12	108954644	108955028	108954988	108955450	HiC_interaction_with_promoter-1
SMAD1-ZNF592	ENSG00000075856	12	108954644	108955028	108959935	108960033	HiC_interaction_with_promoter-1
SMAD1-ZNF592	ENSG00000075856	12	108959801	108960185	108959935	108960033	HiC_interaction_with_promoter-1
SRF-ZNF592	ENSG00000075856	12	108954973	108955353	108954988	108955450	HiC_interaction_with_promoter-1
SRF-ZNF592	ENSG00000075856	12	108954973	108955353	108959935	108960033	HiC_interaction_with_promoter-1
RELB-ZNF592	ENSG00000075856	12	108954658	108955251	108954988	108955450	HiC_interaction_with_promoter-1
RELB-ZNF592	ENSG00000075856	12	108954658	108955251	108959935	108960033	HiC_interaction_with_promoter-1
RELB-ZNF592	ENSG00000075856	12	108934961	108935385	108954988	108955450	HiC_interaction_with_promoter-1
RELB-ZNF592	ENSG00000075856	12	108934961	108935385	108959935	108960033	HiC_interaction_with_promoter-1
RELB-ZNF592	ENSG00000075856	12	108954658	108955256	108954988	108955450	HiC_interaction_with_promoter-1
RELB-ZNF592	ENSG00000075856	12	108954658	108955256	108959935	108960033	HiC_interaction_with_promoter-1
GATAD2B-RELA	ENSG00000075856	12	108959909	108960429	108959873	108960257	HiC_interaction_with_promoter-1
GATAD2B-RELA	ENSG00000075856	12	108959710	108960230	108959873	108960257	HiC_interaction_with_promoter-1
FOXM1-PKNOX1	ENSG00000075856	12	108934984	108935408	108954860	108955380	HiC_interaction_with_promoter-1
FOXM1-PKNOX1	ENSG00000075856	12	108934984	108935408	108959781	108960301	HiC_interaction_with_promoter-1
ATF2-JUND	ENSG00000075856	12	108959759	108960263	108959865	108960149	HiC_interaction_with_promoter-1
ATF2-JUND	ENSG00000075856	12	108954831	108955335	108959865	108960149	HiC_interaction_with_promoter-1
ATF2-JUND	ENSG00000075856	12	108954854	108955374	108959865	108960149	HiC_interaction_with_promoter-1
RELB-STAT1	ENSG00000075856	12	108954658	108955251	108954953	108955317	HiC_interaction_with_promoter-1
RELB-STAT1	ENSG00000075856	12	108934961	108935385	108954953	108955317	HiC_interaction_with_promoter-1
RELB-STAT1	ENSG00000075856	12	108954658	108955256	108954953	108955317	HiC_interaction_with_promoter-1
FOXM1-GATAD2B	ENSG00000076242	3	37034957	37035477	37034875	37035395	HiC_interaction_with_promoter-1
FOXM1-GATAD2B	ENSG00000076242	3	37034650	37035170	37034875	37035395	HiC_interaction_with_promoter-1
ESRRA-JUND	ENSG00000076242	3	37034904	37035268	37034915	37035199	HiC_interaction_with_promoter-1
FOXM1-PKNOX1	ENSG00000076242	3	37034957	37035477	37034522	37035495	HiC_interaction_with_promoter-1
FOXM1-PKNOX1	ENSG00000076242	3	37034650	37035170	37034522	37035495	HiC_interaction_with_promoter-1
ATF2-ESRRA	ENSG00000076242	3	37034705	37035209	37034904	37035268	HiC_interaction_with_promoter-1
ATF2-ESRRA	ENSG00000076242	3	37034895	37035415	37034904	37035268	HiC_interaction_with_promoter-1
ATF2-ESRRA	ENSG00000076242	3	37034677	37035197	37034904	37035268	HiC_interaction_with_promoter-1
ATF2-ESRRA	ENSG00000076242	3	37034907	37035411	37034904	37035268	HiC_interaction_with_promoter-1
ATF2-JUND	ENSG00000076242	3	37034705	37035209	37034915	37035199	HiC_interaction_with_promoter-1
ATF2-JUND	ENSG00000076242	3	37034895	37035415	37034915	37035199	HiC_interaction_with_promoter-1
ATF2-JUND	ENSG00000076242	3	37034677	37035197	37034915	37035199	HiC_interaction_with_promoter-1
ATF2-JUND	ENSG00000076242	3	37034907	37035411	37034915	37035199	HiC_interaction_with_promoter-1
FOXM1-GATAD2B	ENSG00000076604	17	27044499	27045019	27064775	27065295	HiC_interaction_with_promoter-1
ARID3A-GATAD2B	ENSG00000076604	17	27054665	27055015	27064775	27065295	HiC_interaction_with_promoter-1
ATF2-RELB	ENSG00000076641	8	82044971	82045491	82044982	82045384	HiC_interaction_with_promoter-1
ATF2-RELB	ENSG00000076641	8	82044960	82045464	82044982	82045384	HiC_interaction_with_promoter-1
RELB-STAT1	ENSG00000076641	8	82044982	82045384	82044818	82045248	HiC_interaction_with_promoter-1
FOXM1-GATAD2B	ENSG00000076706	11	119189607	119190127	119204988	119205309	HiC_interaction_with_promoter-1
FOXM1-GATAD2B	ENSG00000076706	11	119189885	119190405	119204988	119205309	HiC_interaction_with_promoter-1
ASH2L-MAZ	ENSG00000076928	19	42444855	42445279	42449473	42450057	HiC_interaction_with_promoter-1
EP300-TAF1	ENSG00000076928	19	42364789	42365129	42379720	42380070	HiC_interaction_with_promoter-1
EP300-TAF1	ENSG00000076928	19	42364871	42365207	42379720	42380070	HiC_interaction_with_promoter-1
RELB-STAT1	ENSG00000076928	19	42379580	42380180	42449639	42450003	HiC_interaction_with_promoter-1
FOXM1-GATAD2B	ENSG00000077150	10	104154833	104155353	104154956	104155476	HiC_interaction_with_promoter-1
GATAD2B-RELA	ENSG00000077150	10	104154954	104155338	104154956	104155476	HiC_interaction_with_promoter-1
RELB-STAT1	ENSG00000077150	10	104154922	104155286	104154926	104155564	HiC_interaction_with_promoter-1
ARID3A-GATAD2B	ENSG00000077238	16	27324902	27325252	27324897	27325230	HiC_interaction_with_promoter-1
ARID3A-GATAD2B	ENSG00000077238	16	27324902	27325252	27329886	27330406	HiC_interaction_with_promoter-1
JUND-RELB	ENSG00000077312	19	41224917	41225517	41304779	41305063	HiC_interaction_with_promoter-1
ATF2-RELB	ENSG00000077312	19	41224917	41225517	41304536	41305040	HiC_interaction_with_promoter-1
ATF2-RELB	ENSG00000077312	19	41224917	41225517	41304533	41305053	HiC_interaction_with_promoter-1
RELB-SPI1	ENSG00000077312	19	41224917	41225517	41309817	41310093	HiC_interaction_with_promoter-1
MLLT1-RFX5	ENSG00000077348	19	41869968	41870304	41874718	41875047	HiC_interaction_with_promoter-1
RELB-STAT1	ENSG00000077454	7	100209578	100210178	100209829	100210193	HiC_interaction_with_promoter-1
ATF2-RELB	ENSG00000077585	1	236319948	236320320	236320000	236320354	HiC_interaction_with_promoter-1
ATF2-RELB	ENSG00000077585	1	236304450	236305050	236320000	236320354	HiC_interaction_with_promoter-1
EP300-PBX3	ENSG00000077585	1	236319994	236320354	236319927	236320143	HiC_interaction_with_promoter-1
EP300-PBX3	ENSG00000077585	1	236319994	236320354	236319916	236320136	HiC_interaction_with_promoter-1
EP300-PBX3	ENSG00000077585	1	236319994	236320364	236319927	236320143	HiC_interaction_with_promoter-1
EP300-PBX3	ENSG00000077585	1	236319994	236320364	236319916	236320136	HiC_interaction_with_promoter-1
GATAD2B-PBX3	ENSG00000077585	1	236319927	236320143	236324499	236325019	HiC_interaction_with_promoter-1
GATAD2B-PBX3	ENSG00000077585	1	236319927	236320143	236319753	236320273	HiC_interaction_with_promoter-1
GATAD2B-PBX3	ENSG00000077585	1	236319916	236320136	236324499	236325019	HiC_interaction_with_promoter-1
GATAD2B-PBX3	ENSG00000077585	1	236319916	236320136	236319753	236320273	HiC_interaction_with_promoter-1
MAZ-PBX3	ENSG00000077585	1	236319927	236320143	236319905	236320341	HiC_interaction_with_promoter-1
MAZ-PBX3	ENSG00000077585	1	236319927	236320143	236319911	236320335	HiC_interaction_with_promoter-1
MAZ-PBX3	ENSG00000077585	1	236319916	236320136	236319905	236320341	HiC_interaction_with_promoter-1
MAZ-PBX3	ENSG00000077585	1	236319916	236320136	236319911	236320335	HiC_interaction_with_promoter-1
ASH2L-MAZ	ENSG00000077585	1	236319941	236320525	236319905	236320341	HiC_interaction_with_promoter-1
ASH2L-MAZ	ENSG00000077585	1	236319941	236320525	236319911	236320335	HiC_interaction_with_promoter-1
EP300-TAF1	ENSG00000077585	1	236319805	236320141	236319994	236320354	HiC_interaction_with_promoter-1
EP300-TAF1	ENSG00000077585	1	236319805	236320141	236319994	236320364	HiC_interaction_with_promoter-1
RELB-SPI1	ENSG00000077585	1	236319948	236320320	236319952	236320230	HiC_interaction_with_promoter-1
RELB-SPI1	ENSG00000077585	1	236304450	236305050	236319952	236320230	HiC_interaction_with_promoter-1
RELB-STAT1	ENSG00000077585	1	236319948	236320320	236319733	236320097	HiC_interaction_with_promoter-1
RELB-STAT1	ENSG00000077585	1	236304450	236305050	236319733	236320097	HiC_interaction_with_promoter-1
ATF2-RELB	ENSG00000077684	4	129724797	129725397	129724855	129725359	HiC_interaction_with_promoter-1
RELB-SPI1	ENSG00000078142	18	39534947	39535223	39534842	39535172	HiC_interaction_with_promoter-1
ATF2-RELB	ENSG00000078142	18	39534842	39535172	39534996	39535500	HiC_interaction_with_promoter-1
ATF2-RELB	ENSG00000078142	18	39534842	39535172	39534748	39535252	HiC_interaction_with_promoter-1
ATF2-NRF1	ENSG00000078142	18	39534938	39535188	39534996	39535500	HiC_interaction_with_promoter-1
ATF2-NRF1	ENSG00000078142	18	39534938	39535188	39534748	39535252	HiC_interaction_with_promoter-1
ATF2-NRF1	ENSG00000078142	18	39534918	39535168	39534996	39535500	HiC_interaction_with_promoter-1
ATF2-NRF1	ENSG00000078142	18	39534918	39535168	39534748	39535252	HiC_interaction_with_promoter-1
EP300-TAF1	ENSG00000078246	12	2999948	3000308	2999937	3000273	HiC_interaction_with_promoter-1
EP300-TAF1	ENSG00000078246	12	2999948	3000308	2999897	3000237	HiC_interaction_with_promoter-1
ATF2-RELB	ENSG00000078246	12	2999848	3000448	2999719	3000223	HiC_interaction_with_promoter-1
ATF2-NRF1	ENSG00000078246	12	2999719	3000223	2999768	3000018	HiC_interaction_with_promoter-1
ARID3A-GATAD2B	ENSG00000078674	8	17779940	17780290	17779953	17780241	HiC_interaction_with_promoter-1
GATAD2B-RELA	ENSG00000078674	8	17779957	17780341	17779953	17780241	HiC_interaction_with_promoter-1
ATF2-RELB	ENSG00000078674	8	17779915	17780359	17879760	17880280	HiC_interaction_with_promoter-1
ATF2-RELB	ENSG00000078674	8	17779915	17780359	17779894	17780398	HiC_interaction_with_promoter-1
ATF2-RELB	ENSG00000078674	8	17779915	17780359	17879734	17880238	HiC_interaction_with_promoter-1
ATF2-RELB	ENSG00000078674	8	17779915	17780359	17779856	17780376	HiC_interaction_with_promoter-1
RELB-STAT1	ENSG00000078674	8	17779915	17780359	17779925	17780289	HiC_interaction_with_promoter-1
ATF2-RELB	ENSG00000078900	1	3589908	3590412	3594798	3595398	HiC_interaction_with_promoter-1
CREM-RELA	ENSG00000078900	1	3589792	3590152	3604895	3605279	HiC_interaction_with_promoter-1
GATAD2B-RELA	ENSG00000078900	1	3594922	3595442	3604895	3605279	HiC_interaction_with_promoter-1
ATF2-RELB	ENSG00000079112	8	95229713	95230313	95229557	95230061	HiC_interaction_with_promoter-1
ATF2-RELB	ENSG00000079112	8	95229713	95230313	95229549	95230069	HiC_interaction_with_promoter-1
ATF2-RELB	ENSG00000079112	8	95229509	95230109	95229557	95230061	HiC_interaction_with_promoter-1
ATF2-RELB	ENSG00000079112	8	95229509	95230109	95229549	95230069	HiC_interaction_with_promoter-1
ATF2-RELB	ENSG00000079246	2	216954991	216955511	216979556	216980156	HiC_interaction_with_promoter-1
FOXM1-GATAD2B	ENSG00000079263	2	231084559	231085079	231099489	231100009	HiC_interaction_with_promoter-1
FOXM1-GATAD2B	ENSG00000079263	2	231084559	231085079	231084497	231085017	HiC_interaction_with_promoter-1
ATF2-RELB	ENSG00000079263	2	231099551	231100151	231159929	231160339	HiC_interaction_with_promoter-1
ATF2-RELB	ENSG00000079263	2	231099551	231100151	231099488	231100008	HiC_interaction_with_promoter-1
ATF2-RELB	ENSG00000079263	2	231099551	231100151	231099506	231100010	HiC_interaction_with_promoter-1
ATF2-RELB	ENSG00000079263	2	231099551	231100151	231134675	231135085	HiC_interaction_with_promoter-1
FOXK2-MTA2	ENSG00000079263	2	231069933	231070100	231084755	231085315	HiC_interaction_with_promoter-1
FOXK2-MTA2	ENSG00000079263	2	231069933	231070100	231069667	231070227	HiC_interaction_with_promoter-1
FOXK2-MTA2	ENSG00000079263	2	231069933	231070100	231084554	231085114	HiC_interaction_with_promoter-1
RELB-SPI1	ENSG00000079263	2	231069950	231070074	231099551	231100151	HiC_interaction_with_promoter-1
ATF2-RELB	ENSG00000079277	1	47069775	47070375	47079694	47080198	HiC_interaction_with_promoter-1
ATF2-RELB	ENSG00000079277	1	47069576	47070176	47079694	47080198	HiC_interaction_with_promoter-1
ATF2-NRF1	ENSG00000079277	1	47069878	47070128	47079694	47080198	HiC_interaction_with_promoter-1
ATF2-NRF1	ENSG00000079277	1	47069876	47070126	47079694	47080198	HiC_interaction_with_promoter-1
RELB-SPI1	ENSG00000079337	12	48099758	48100034	48149447	48150047	HiC_interaction_with_promoter-1
FOXM1-GATAD2B	ENSG00000079387	12	48499588	48500108	48499816	48500336	HiC_interaction_with_promoter-1
FOXM1-GATAD2B	ENSG00000079387	12	48499588	48500108	48499607	48500127	HiC_interaction_with_promoter-1
FOXM1-GATAD2B	ENSG00000079387	12	48499911	48500431	48499607	48500127	HiC_interaction_with_promoter-1
ARID3A-GATAD2B	ENSG00000079387	12	48499607	48500127	48499958	48500308	HiC_interaction_with_promoter-1
FOXM1-PKNOX1	ENSG00000079387	12	48499588	48500108	48499815	48500239	HiC_interaction_with_promoter-1
ASH2L-MAZ	ENSG00000079387	12	48499546	48500130	48499908	48500344	HiC_interaction_with_promoter-1
ASH2L-MAZ	ENSG00000079387	12	48499546	48500130	48499914	48500338	HiC_interaction_with_promoter-1
ASH2L-MAZ	ENSG00000079387	12	48499546	48500130	48499694	48500118	HiC_interaction_with_promoter-1
ASH2L-MAZ	ENSG00000079387	12	48499546	48500130	48499688	48500124	HiC_interaction_with_promoter-1
ATF2-NRF1	ENSG00000079432	19	42774667	42775171	42774894	42775144	HiC_interaction_with_promoter-1
JUND-RELB	ENSG00000079432	19	42774504	42775104	42829826	42830110	HiC_interaction_with_promoter-1
ATF2-RELB	ENSG00000079432	19	42774504	42775104	42774667	42775171	HiC_interaction_with_promoter-1
FOXK2-MTA2	ENSG00000079432	19	42774661	42775221	42774790	42775200	HiC_interaction_with_promoter-1
RELB-SPI1	ENSG00000079432	19	42774504	42775104	42789735	42790011	HiC_interaction_with_promoter-1
ATF2-JUND	ENSG00000079432	19	42774667	42775171	42829826	42830110	HiC_interaction_with_promoter-1
ARID3A-GATAD2B	ENSG00000079459	8	11659682	11660032	11724892	11725412	HiC_interaction_with_promoter-1
EP300-TAF1	ENSG00000079459	8	11659792	11660132	11659949	11660309	HiC_interaction_with_promoter-1
EP300-TAF1	ENSG00000079459	8	11659794	11660130	11659949	11660309	HiC_interaction_with_promoter-1
RELB-SPI1	ENSG00000079459	8	11659759	11660359	11724781	11725034	HiC_interaction_with_promoter-1
RELB-SPI1	ENSG00000079459	8	11659768	11660021	11724781	11725034	HiC_interaction_with_promoter-1
ATF2-JUND	ENSG00000079462	19	42774667	42775171	42829826	42830110	HiC_interaction_with_promoter-1
ASH2L-MAZ	ENSG00000080503	9	2014618	2015202	2014939	2015363	HiC_interaction_with_promoter-1
ASH2L-MAZ	ENSG00000080503	9	2014618	2015202	2014948	2015384	HiC_interaction_with_promoter-1
FOXM1-GATAD2B	ENSG00000080603	16	30669919	30670439	30709865	30710385	HiC_interaction_with_promoter-1
FOXM1-GATAD2B	ENSG00000080819	3	98269530	98270050	98279584	98280104	HiC_interaction_with_promoter-1
ARID3A-GATAD2B	ENSG00000080819	3	98269530	98270050	98279760	98280110	HiC_interaction_with_promoter-1
FOXM1-PKNOX1	ENSG00000080819	3	98279632	98280056	98279584	98280104	HiC_interaction_with_promoter-1
FOXM1-GATAD2B	ENSG00000080822	3	98264815	98265335	98269530	98270050	HiC_interaction_with_promoter-1
FOXM1-PKNOX1	ENSG00000080822	3	98279632	98280056	98279584	98280104	HiC_interaction_with_promoter-1
FOXM1-GATAD2B	ENSG00000081019	1	114354536	114355056	114354885	114355405	HiC_interaction_with_promoter-1
FOXM1-GATAD2B	ENSG00000081019	1	114354930	114355450	114354885	114355405	HiC_interaction_with_promoter-1
FOXM1-PKNOX1	ENSG00000081019	1	114354864	114355166	114354885	114355405	HiC_interaction_with_promoter-1
ASH2L-MAZ	ENSG00000081019	1	114354552	114355136	114354776	114355200	HiC_interaction_with_promoter-1
ASH2L-MAZ	ENSG00000081019	1	114354552	114355136	114354975	114355399	HiC_interaction_with_promoter-1
ASH2L-MAZ	ENSG00000081019	1	114354552	114355136	114354760	114355196	HiC_interaction_with_promoter-1
ATF2-RELB	ENSG00000081019	1	114354802	114355322	114354797	114355299	HiC_interaction_with_promoter-1
ATF2-RELB	ENSG00000081019	1	114354775	114355279	114354797	114355299	HiC_interaction_with_promoter-1
RELB-STAT1	ENSG00000081019	1	114354835	114355199	114354797	114355299	HiC_interaction_with_promoter-1
ATF2-NRF1	ENSG00000081019	1	114354843	114355093	114354802	114355322	HiC_interaction_with_promoter-1
ATF2-NRF1	ENSG00000081019	1	114354843	114355093	114354775	114355279	HiC_interaction_with_promoter-1
ATF2-RELB	ENSG00000081059	5	133439759	133440001	133439737	133440024	HiC_interaction_with_promoter-1
ATF2-RELB	ENSG00000081059	5	133439759	133440001	133449935	133450270	HiC_interaction_with_promoter-1
ATF2-RELB	ENSG00000081059	5	133439759	133440001	133439934	133440534	HiC_interaction_with_promoter-1
ATF2-RELB	ENSG00000081059	5	133439746	133440014	133439737	133440024	HiC_interaction_with_promoter-1
ATF2-RELB	ENSG00000081059	5	133439746	133440014	133449935	133450270	HiC_interaction_with_promoter-1
ATF2-RELB	ENSG00000081059	5	133439746	133440014	133439934	133440534	HiC_interaction_with_promoter-1
SMAD1-ZNF592	ENSG00000081059	5	133439823	133440107	133449935	133450319	HiC_interaction_with_promoter-1
SRF-ZNF592	ENSG00000081059	5	133439823	133440107	133449958	133450389	HiC_interaction_with_promoter-1
RELB-ZNF592	ENSG00000081059	5	133439823	133440107	133439737	133440024	HiC_interaction_with_promoter-1
RELB-ZNF592	ENSG00000081059	5	133439823	133440107	133449935	133450270	HiC_interaction_with_promoter-1
RELB-ZNF592	ENSG00000081059	5	133439823	133440107	133439934	133440534	HiC_interaction_with_promoter-1
ARID3A-GATAD2B	ENSG00000081189	5	88174726	88175076	88179801	88180321	HiC_interaction_with_promoter-1
FOXM1-GATAD2B	ENSG00000081320	2	197024864	197025147	197024849	197025369	HiC_interaction_with_promoter-1
ATF2-RELB	ENSG00000081320	2	197014588	197015108	197069873	197070473	HiC_interaction_with_promoter-1
ATF2-RELB	ENSG00000081320	2	197014588	197015108	197024841	197025249	HiC_interaction_with_promoter-1
ATF2-RELB	ENSG00000081320	2	197014588	197015108	197014575	197015175	HiC_interaction_with_promoter-1
ATF2-RELB	ENSG00000081320	2	197069921	197070425	197069873	197070473	HiC_interaction_with_promoter-1
ATF2-RELB	ENSG00000081320	2	197024849	197025162	197069873	197070473	HiC_interaction_with_promoter-1
ATF2-RELB	ENSG00000081320	2	197024849	197025162	197024841	197025249	HiC_interaction_with_promoter-1
ATF2-RELB	ENSG00000081320	2	197024860	197025135	197069873	197070473	HiC_interaction_with_promoter-1
ATF2-RELB	ENSG00000081320	2	197024860	197025135	197024841	197025249	HiC_interaction_with_promoter-1
ATF2-RELB	ENSG00000081320	2	197014607	197015111	197069873	197070473	HiC_interaction_with_promoter-1
ATF2-RELB	ENSG00000081320	2	197014607	197015111	197024841	197025249	HiC_interaction_with_promoter-1
ATF2-RELB	ENSG00000081320	2	197014607	197015111	197014575	197015175	HiC_interaction_with_promoter-1
ATF2-RELB	ENSG00000081320	2	197069952	197070472	197069873	197070473	HiC_interaction_with_promoter-1
SMAD1-ZNF592	ENSG00000081320	2	197024834	197025218	197024967	197025251	HiC_interaction_with_promoter-1
SRF-ZNF592	ENSG00000081320	2	197024725	197025025	197024967	197025251	HiC_interaction_with_promoter-1
ARID3A-GATAD2B	ENSG00000081320	2	197024881	197025231	197024849	197025369	HiC_interaction_with_promoter-1
CREM-RELA	ENSG00000081320	2	197024839	197025223	197024932	197025145	HiC_interaction_with_promoter-1
CREM-RELA	ENSG00000081320	2	197024839	197025223	197034872	197035232	HiC_interaction_with_promoter-1
RELB-ZNF592	ENSG00000081320	2	197024967	197025251	197069873	197070473	HiC_interaction_with_promoter-1
RELB-ZNF592	ENSG00000081320	2	197024967	197025251	197024841	197025249	HiC_interaction_with_promoter-1
GATAD2B-RELA	ENSG00000081320	2	197024849	197025369	197069826	197070210	HiC_interaction_with_promoter-1
GATAD2B-RELA	ENSG00000081320	2	197024849	197025369	197024839	197025223	HiC_interaction_with_promoter-1
FOXM1-PKNOX1	ENSG00000081320	2	197024864	197025147	197034834	197035115	HiC_interaction_with_promoter-1
ATF2-ESRRA	ENSG00000081320	2	197014588	197015108	197069650	197070014	HiC_interaction_with_promoter-1
ATF2-ESRRA	ENSG00000081320	2	197069921	197070425	197069650	197070014	HiC_interaction_with_promoter-1
ATF2-ESRRA	ENSG00000081320	2	197024849	197025162	197069650	197070014	HiC_interaction_with_promoter-1
ATF2-ESRRA	ENSG00000081320	2	197024860	197025135	197069650	197070014	HiC_interaction_with_promoter-1
ATF2-ESRRA	ENSG00000081320	2	197014607	197015111	197069650	197070014	HiC_interaction_with_promoter-1
ATF2-ESRRA	ENSG00000081320	2	197069952	197070472	197069650	197070014	HiC_interaction_with_promoter-1
RELB-SPI1	ENSG00000081320	2	197024817	197025093	197069873	197070473	HiC_interaction_with_promoter-1
RELB-SPI1	ENSG00000081320	2	197024817	197025093	197024841	197025249	HiC_interaction_with_promoter-1
FOXM1-GATAD2B	ENSG00000081665	19	19934649	19935169	19934680	19935200	HiC_interaction_with_promoter-1
CREM-RELA	ENSG00000081665	19	19934720	19935080	19934860	19935029	HiC_interaction_with_promoter-1
GATAD2B-RELA	ENSG00000081665	19	19934649	19935169	19934860	19935029	HiC_interaction_with_promoter-1
RELB-SPI1	ENSG00000081665	19	19934717	19935103	19934823	19935019	HiC_interaction_with_promoter-1
ASH2L-MAZ	ENSG00000081721	1	161709654	161710090	161719574	161720158	HiC_interaction_with_promoter-1
ASH2L-MAZ	ENSG00000081721	1	161709646	161710070	161719574	161720158	HiC_interaction_with_promoter-1
ATF2-RELB	ENSG00000081853	5	140699968	140700568	140904546	140905050	HiC_interaction_with_promoter-1
ATF2-RELB	ENSG00000082269	6	71089991	71090401	71124971	71125244	HiC_interaction_with_promoter-1
ATF2-RELB	ENSG00000082269	6	71089930	71090450	71124971	71125244	HiC_interaction_with_promoter-1
ATF2-RELB	ENSG00000082269	6	71089938	71090442	71124971	71125244	HiC_interaction_with_promoter-1
RELB-STAT1	ENSG00000082805	12	1099908	1100272	1189931	1190531	HiC_interaction_with_promoter-1
RELB-STAT1	ENSG00000082805	12	1099908	1100272	1099949	1100191	HiC_interaction_with_promoter-1
RELB-SPI1	ENSG00000082996	3	149534827	149535094	149534781	149535057	HiC_interaction_with_promoter-1
RELB-SPI1	ENSG00000082996	3	149534827	149535094	149599733	149600009	HiC_interaction_with_promoter-1
ATF2-RELB	ENSG00000082996	3	149534827	149535094	149534757	149535261	HiC_interaction_with_promoter-1
ATF2-RELB	ENSG00000082996	3	149534827	149535094	149534754	149535274	HiC_interaction_with_promoter-1
ATF2-RELB	ENSG00000083444	1	11969579	11970245	11989779	11990338	HiC_interaction_with_promoter-1
ATF2-RELB	ENSG00000083444	1	11969579	11970245	11989779	11990359	HiC_interaction_with_promoter-1
ATF2-RELB	ENSG00000083444	1	11969585	11970225	11989779	11990338	HiC_interaction_with_promoter-1
ATF2-RELB	ENSG00000083444	1	11969585	11970225	11989779	11990359	HiC_interaction_with_promoter-1
RELB-ZNF592	ENSG00000083444	1	11969791	11970075	11989779	11990338	HiC_interaction_with_promoter-1
RELB-ZNF592	ENSG00000083444	1	11969791	11970075	11989779	11990359	HiC_interaction_with_promoter-1
RELB-SPI1	ENSG00000083444	1	11969640	11970240	11994954	11995230	HiC_interaction_with_promoter-1
RELB-SPI1	ENSG00000083444	1	11989779	11990338	11994954	11995230	HiC_interaction_with_promoter-1
RELB-SPI1	ENSG00000083444	1	11989779	11990359	11994954	11995230	HiC_interaction_with_promoter-1
RELB-STAT1	ENSG00000083444	1	11969845	11970209	11989779	11990338	HiC_interaction_with_promoter-1
RELB-STAT1	ENSG00000083444	1	11969845	11970209	11989779	11990359	HiC_interaction_with_promoter-1
FOXM1-GATAD2B	ENSG00000083457	17	3699699	3700219	3699936	3700456	HiC_interaction_with_promoter-1
FOXM1-GATAD2B	ENSG00000083457	17	3699699	3700219	3699722	3700242	HiC_interaction_with_promoter-1
FOXM1-GATAD2B	ENSG00000083457	17	3694740	3695260	3699936	3700456	HiC_interaction_with_promoter-1
FOXM1-GATAD2B	ENSG00000083457	17	3694740	3695260	3699722	3700242	HiC_interaction_with_promoter-1
ARID3A-GATAD2B	ENSG00000083457	17	3699661	3700011	3699936	3700456	HiC_interaction_with_promoter-1
ARID3A-GATAD2B	ENSG00000083457	17	3699661	3700011	3699722	3700242	HiC_interaction_with_promoter-1
ARID3A-GATAD2B	ENSG00000083457	17	3699860	3700210	3699936	3700456	HiC_interaction_with_promoter-1
ARID3A-GATAD2B	ENSG00000083457	17	3699860	3700210	3699722	3700242	HiC_interaction_with_promoter-1
JUND-RELB	ENSG00000083457	17	3699662	3700127	3699849	3700133	HiC_interaction_with_promoter-1
FOXM1-PKNOX1	ENSG00000083457	17	3699699	3700219	3699847	3700087	HiC_interaction_with_promoter-1
FOXM1-PKNOX1	ENSG00000083457	17	3694740	3695260	3699847	3700087	HiC_interaction_with_promoter-1
EP300-TAF1	ENSG00000083457	17	3699737	3700097	3699770	3700106	HiC_interaction_with_promoter-1
EP300-TAF1	ENSG00000083457	17	3699820	3700176	3699770	3700106	HiC_interaction_with_promoter-1
EP300-TAF1	ENSG00000083457	17	3699795	3700075	3699770	3700106	HiC_interaction_with_promoter-1
EP300-TAF1	ENSG00000083457	17	3699806	3700156	3699770	3700106	HiC_interaction_with_promoter-1
EP300-TAF1	ENSG00000083457	17	3699789	3700059	3699770	3700106	HiC_interaction_with_promoter-1
EP300-TAF1	ENSG00000083457	17	3699754	3700124	3699770	3700106	HiC_interaction_with_promoter-1
MAZ-PBX3	ENSG00000083457	17	3699809	3700025	3699699	3700135	HiC_interaction_with_promoter-1
MAZ-PBX3	ENSG00000083457	17	3699809	3700025	3699903	3700339	HiC_interaction_with_promoter-1
MAZ-PBX3	ENSG00000083457	17	3699809	3700025	3699908	3700332	HiC_interaction_with_promoter-1
MAZ-PBX3	ENSG00000083457	17	3699809	3700025	3699709	3700133	HiC_interaction_with_promoter-1
ATF2-JUND	ENSG00000083457	17	3699849	3700133	3699930	3700434	HiC_interaction_with_promoter-1
ATF2-JUND	ENSG00000083457	17	3699849	3700133	3699730	3700234	HiC_interaction_with_promoter-1
ATF2-JUND	ENSG00000083457	17	3699849	3700133	3699721	3700241	HiC_interaction_with_promoter-1
ATF2-RELB	ENSG00000083457	17	3699662	3700127	3699930	3700434	HiC_interaction_with_promoter-1
ATF2-RELB	ENSG00000083457	17	3699662	3700127	3699730	3700234	HiC_interaction_with_promoter-1
ATF2-RELB	ENSG00000083457	17	3699662	3700127	3699721	3700241	HiC_interaction_with_promoter-1
EP300-PBX3	ENSG00000083457	17	3699809	3700025	3699737	3700097	HiC_interaction_with_promoter-1
EP300-PBX3	ENSG00000083457	17	3699809	3700025	3699820	3700176	HiC_interaction_with_promoter-1
EP300-PBX3	ENSG00000083457	17	3699809	3700025	3699795	3700075	HiC_interaction_with_promoter-1
EP300-PBX3	ENSG00000083457	17	3699809	3700025	3699806	3700156	HiC_interaction_with_promoter-1
EP300-PBX3	ENSG00000083457	17	3699809	3700025	3699789	3700059	HiC_interaction_with_promoter-1
EP300-PBX3	ENSG00000083457	17	3699809	3700025	3699754	3700124	HiC_interaction_with_promoter-1
GATAD2B-PBX3	ENSG00000083457	17	3699809	3700025	3699936	3700456	HiC_interaction_with_promoter-1
GATAD2B-PBX3	ENSG00000083457	17	3699809	3700025	3699722	3700242	HiC_interaction_with_promoter-1
ATF2-RELB	ENSG00000083799	16	50769490	50770231	50769701	50770021	HiC_interaction_with_promoter-1
ATF2-RELB	ENSG00000083799	16	50769490	50770231	50769672	50770044	HiC_interaction_with_promoter-1
SMAD1-ZNF592	ENSG00000083799	16	50769628	50770012	50769821	50770105	HiC_interaction_with_promoter-1
CREM-RELA	ENSG00000083799	16	50769729	50770089	50769707	50770091	HiC_interaction_with_promoter-1
RELB-ZNF592	ENSG00000083799	16	50769490	50770231	50769821	50770105	HiC_interaction_with_promoter-1
FOXM1-GATAD2B	ENSG00000084090	2	96899492	96900012	96899518	96900038	HiC_interaction_with_promoter-1
FOXM1-GATAD2B	ENSG00000084090	2	96899492	96900012	96899722	96900242	HiC_interaction_with_promoter-1
FOXM1-PKNOX1	ENSG00000084090	2	96834932	96835356	96899492	96900012	HiC_interaction_with_promoter-1
RELB-STAT1	ENSG00000084090	2	96824950	96825314	96899412	96900012	HiC_interaction_with_promoter-1
RELB-STAT1	ENSG00000084090	2	96824950	96825314	96839972	96840572	HiC_interaction_with_promoter-1
EP300-TAF1	ENSG00000084092	4	57844769	57845129	57844905	57845245	HiC_interaction_with_promoter-1
EP300-TAF1	ENSG00000084092	4	57844769	57845129	57844907	57845243	HiC_interaction_with_promoter-1
MLLT1-RFX5	ENSG00000084092	4	57844894	57845470	57844843	57845179	HiC_interaction_with_promoter-1
SRF-ZNF592	ENSG00000084093	4	57774879	57775163	57774941	57775141	HiC_interaction_with_promoter-1
ARID3A-GATAD2B	ENSG00000084093	4	57774763	57775183	57774834	57775184	HiC_interaction_with_promoter-1
ARID3A-GATAD2B	ENSG00000084093	4	57774763	57775254	57774834	57775184	HiC_interaction_with_promoter-1
MLLT1-RFX5	ENSG00000084112	12	109219736	109220312	109244677	109245013	HiC_interaction_with_promoter-1
ATF2-RELB	ENSG00000084112	12	109219928	109220528	109244499	109245019	HiC_interaction_with_promoter-1
ATF2-RELB	ENSG00000084112	12	109219928	109220528	109244750	109245254	HiC_interaction_with_promoter-1
ATF2-RELB	ENSG00000084112	12	109219928	109220528	109244522	109245026	HiC_interaction_with_promoter-1
ATF2-RELB	ENSG00000084112	12	109219722	109220322	109244499	109245019	HiC_interaction_with_promoter-1
ATF2-RELB	ENSG00000084112	12	109219722	109220322	109244750	109245254	HiC_interaction_with_promoter-1
ATF2-RELB	ENSG00000084112	12	109219722	109220322	109244522	109245026	HiC_interaction_with_promoter-1
RELB-ZNF592	ENSG00000084112	12	109219928	109220528	109244797	109245081	HiC_interaction_with_promoter-1
RELB-ZNF592	ENSG00000084112	12	109219722	109220322	109244797	109245081	HiC_interaction_with_promoter-1
GATAD2B-RELA	ENSG00000084112	12	109219876	109220396	109219742	109220126	HiC_interaction_with_promoter-1
RELB-STAT1	ENSG00000084112	12	109219928	109220528	109244694	109245058	HiC_interaction_with_promoter-1
RELB-STAT1	ENSG00000084112	12	109219722	109220322	109244694	109245058	HiC_interaction_with_promoter-1
FOXM1-GATAD2B	ENSG00000084207	11	67329590	67330110	67329554	67330074	HiC_interaction_with_promoter-1
ATF2-RELB	ENSG00000084207	11	67329519	67330039	67349936	67350536	HiC_interaction_with_promoter-1
ATF2-RELB	ENSG00000084207	11	67329526	67330030	67349936	67350536	HiC_interaction_with_promoter-1
FOXM1-PKNOX1	ENSG00000084207	11	67329669	67330093	67329554	67330074	HiC_interaction_with_promoter-1
ATF2-RELB	ENSG00000084636	1	32109969	32110473	32164678	32165278	HiC_interaction_with_promoter-1
ARID3A-GATAD2B	ENSG00000084636	1	32109985	32110335	32164866	32165386	HiC_interaction_with_promoter-1
FOXM1-GATAD2B	ENSG00000084676	2	24714741	24715261	24809763	24810283	HiC_interaction_with_promoter-1
GATAD2B-RELA	ENSG00000084676	2	24714741	24715261	24809921	24810150	HiC_interaction_with_promoter-1
RELB-STAT1	ENSG00000084774	2	27434846	27435227	27434874	27435238	HiC_interaction_with_promoter-1
ATF2-RELB	ENSG00000085117	11	44599837	44600341	44649876	44650476	HiC_interaction_with_promoter-1
ATF2-RELB	ENSG00000085117	11	44634802	44635322	44649876	44650476	HiC_interaction_with_promoter-1
FOXM1-GATAD2B	ENSG00000085274	3	169489885	169490405	169529943	169530463	HiC_interaction_with_promoter-1
ARID3A-GATAD2B	ENSG00000085274	3	169489920	169490045	169529943	169530463	HiC_interaction_with_promoter-1
ATF2-RELB	ENSG00000085274	3	169489808	169490312	169489966	169490566	HiC_interaction_with_promoter-1
ATF2-RELB	ENSG00000085274	3	169489770	169490290	169489966	169490566	HiC_interaction_with_promoter-1
ATF2-RELB	ENSG00000085274	3	169489969	169490489	169489966	169490566	HiC_interaction_with_promoter-1
RELB-STAT1	ENSG00000085274	3	169489853	169490217	169489966	169490566	HiC_interaction_with_promoter-1
EP300-PBX3	ENSG00000085449	2	224809855	224810215	224809915	224810131	HiC_interaction_with_promoter-1
EP300-PBX3	ENSG00000085449	2	224809855	224810215	224809913	224810133	HiC_interaction_with_promoter-1
EP300-PBX3	ENSG00000085449	2	224809850	224810220	224809915	224810131	HiC_interaction_with_promoter-1
EP300-PBX3	ENSG00000085449	2	224809850	224810220	224809913	224810133	HiC_interaction_with_promoter-1
GATAD2B-PBX3	ENSG00000085449	2	224809915	224810131	224809875	224810073	HiC_interaction_with_promoter-1
GATAD2B-PBX3	ENSG00000085449	2	224809913	224810133	224809875	224810073	HiC_interaction_with_promoter-1
ARID3A-GATAD2B	ENSG00000085449	2	224809852	224810202	224809875	224810073	HiC_interaction_with_promoter-1
MAZ-PBX3	ENSG00000085449	2	224809847	224810283	224809915	224810131	HiC_interaction_with_promoter-1
MAZ-PBX3	ENSG00000085449	2	224809847	224810283	224809913	224810133	HiC_interaction_with_promoter-1
MAZ-PBX3	ENSG00000085449	2	224809853	224810277	224809915	224810131	HiC_interaction_with_promoter-1
MAZ-PBX3	ENSG00000085449	2	224809853	224810277	224809913	224810133	HiC_interaction_with_promoter-1
ASH2L-MAZ	ENSG00000085449	2	224809654	224810238	224809847	224810283	HiC_interaction_with_promoter-1
ASH2L-MAZ	ENSG00000085449	2	224809654	224810238	224809853	224810277	HiC_interaction_with_promoter-1
EP300-TAF1	ENSG00000085449	2	224809827	224810167	224809855	224810215	HiC_interaction_with_promoter-1
EP300-TAF1	ENSG00000085449	2	224809827	224810167	224809850	224810220	HiC_interaction_with_promoter-1
EP300-TAF1	ENSG00000085449	2	224809829	224810165	224809855	224810215	HiC_interaction_with_promoter-1
EP300-TAF1	ENSG00000085449	2	224809829	224810165	224809850	224810220	HiC_interaction_with_promoter-1
RELB-SPI1	ENSG00000085514	7	99964839	99965115	100004996	100005596	HiC_interaction_with_promoter-1
MLLT1-RFX5	ENSG00000085644	16	3184737	3185073	3199698	3200274	HiC_interaction_with_promoter-1
CREM-RELA	ENSG00000085644	16	3184782	3185085	3184675	3185059	HiC_interaction_with_promoter-1
ASH2L-MAZ	ENSG00000085644	16	3149995	3150431	3184907	3185491	HiC_interaction_with_promoter-1
ASH2L-MAZ	ENSG00000085644	16	3184803	3185239	3184907	3185491	HiC_interaction_with_promoter-1
BCL3-HDAC2	ENSG00000085644	16	3169880	3170224	3184856	3185372	HiC_interaction_with_promoter-1
RELB-STAT1	ENSG00000085644	16	3179431	3180031	3199896	3200260	HiC_interaction_with_promoter-1
MAZ-PBX3	ENSG00000085978	2	234159838	234160058	234159979	234160415	HiC_interaction_with_promoter-1
MAZ-PBX3	ENSG00000085978	2	234159838	234160058	234159978	234160402	HiC_interaction_with_promoter-1
MAZ-PBX3	ENSG00000085978	2	234159834	234160050	234159979	234160415	HiC_interaction_with_promoter-1
MAZ-PBX3	ENSG00000085978	2	234159834	234160050	234159978	234160402	HiC_interaction_with_promoter-1
ASH2L-MAZ	ENSG00000086061	9	33024746	33025330	33024931	33025355	HiC_interaction_with_promoter-1
ASH2L-MAZ	ENSG00000086061	9	33024746	33025330	33024926	33025362	HiC_interaction_with_promoter-1
ASH2L-MAZ	ENSG00000086061	9	33024422	33025006	33024931	33025355	HiC_interaction_with_promoter-1
ASH2L-MAZ	ENSG00000086061	9	33024422	33025006	33024926	33025362	HiC_interaction_with_promoter-1
ATF2-RELB	ENSG00000086061	9	33024991	33025495	33024733	33025333	HiC_interaction_with_promoter-1
ATF2-RELB	ENSG00000086061	9	33024983	33025503	33024733	33025333	HiC_interaction_with_promoter-1
FOXM1-GATAD2B	ENSG00000086062	9	33159727	33160247	33159790	33160310	HiC_interaction_with_promoter-1
ATF2-RELB	ENSG00000086062	9	33159581	33160181	33159912	33160102	HiC_interaction_with_promoter-1
ATF2-RELB	ENSG00000086062	9	33159581	33160181	33159897	33160103	HiC_interaction_with_promoter-1
ARID3A-GATAD2B	ENSG00000086062	9	33159727	33160247	33159721	33160071	HiC_interaction_with_promoter-1
GATAD2B-RELA	ENSG00000086062	9	33159727	33160247	33159871	33160255	HiC_interaction_with_promoter-1
RELB-SPI1	ENSG00000086062	9	33159581	33160181	33159852	33160128	HiC_interaction_with_promoter-1
RELB-SPI1	ENSG00000086065	9	33264757	33265133	33264853	33265129	HiC_interaction_with_promoter-1
RELB-SPI1	ENSG00000086102	9	33264853	33265129	33264757	33265133	HiC_interaction_with_promoter-1
FOXM1-GATAD2B	ENSG00000086619	1	236444934	236445454	236444865	236445385	HiC_interaction_with_promoter-1
JUND-ZNF24	ENSG00000086848	11	111699979	111700309	111699954	111700238	HiC_interaction_with_promoter-1
JUND-ZNF24	ENSG00000086848	11	111699979	111700309	111699937	111700247	HiC_interaction_with_promoter-1
JUND-RELB	ENSG00000086848	11	111699987	111700336	111699954	111700238	HiC_interaction_with_promoter-1
JUND-RELB	ENSG00000086848	11	111699987	111700336	111699937	111700247	HiC_interaction_with_promoter-1
FOXM1-PKNOX1	ENSG00000086848	11	111699915	111700435	111699757	111700181	HiC_interaction_with_promoter-1
RELB-ZNF592	ENSG00000086848	11	111699987	111700336	111699989	111700273	HiC_interaction_with_promoter-1
ATF2-RELB	ENSG00000086848	11	111699888	111700392	111699987	111700336	HiC_interaction_with_promoter-1
ATF2-JUND	ENSG00000086848	11	111699888	111700392	111699954	111700238	HiC_interaction_with_promoter-1
ATF2-JUND	ENSG00000086848	11	111699888	111700392	111699937	111700247	HiC_interaction_with_promoter-1
FOXM1-GATAD2B	ENSG00000087077	7	100449611	100450131	100449868	100450388	HiC_interaction_with_promoter-1
JUND-RELB	ENSG00000087077	7	100464795	100465029	100464820	100465104	HiC_interaction_with_promoter-1
JUND-RELB	ENSG00000087077	7	100449713	100450313	100464820	100465104	HiC_interaction_with_promoter-1
ATF2-RELB	ENSG00000087077	7	100464795	100465029	100464810	100465101	HiC_interaction_with_promoter-1
ATF2-RELB	ENSG00000087077	7	100464795	100465029	100464742	100465143	HiC_interaction_with_promoter-1
ATF2-RELB	ENSG00000087077	7	100464795	100465029	100464808	100465079	HiC_interaction_with_promoter-1
ATF2-RELB	ENSG00000087077	7	100449713	100450313	100464810	100465101	HiC_interaction_with_promoter-1
ATF2-RELB	ENSG00000087077	7	100449713	100450313	100464742	100465143	HiC_interaction_with_promoter-1
ATF2-RELB	ENSG00000087077	7	100449713	100450313	100464808	100465079	HiC_interaction_with_promoter-1
EP300-TAF1	ENSG00000087077	7	100464890	100465226	100464805	100465175	HiC_interaction_with_promoter-1
EP300-TAF1	ENSG00000087077	7	100464890	100465226	100464828	100465188	HiC_interaction_with_promoter-1
EP300-TAF1	ENSG00000087077	7	100464890	100465230	100464805	100465175	HiC_interaction_with_promoter-1
EP300-TAF1	ENSG00000087077	7	100464890	100465230	100464828	100465188	HiC_interaction_with_promoter-1
EP300-TAF1	ENSG00000087077	7	100434976	100435316	100464805	100465175	HiC_interaction_with_promoter-1
EP300-TAF1	ENSG00000087077	7	100434976	100435316	100464828	100465188	HiC_interaction_with_promoter-1
ATF2-JUND	ENSG00000087077	7	100464810	100465101	100464820	100465104	HiC_interaction_with_promoter-1
ATF2-JUND	ENSG00000087077	7	100464742	100465143	100464820	100465104	HiC_interaction_with_promoter-1
ATF2-JUND	ENSG00000087077	7	100464808	100465079	100464820	100465104	HiC_interaction_with_promoter-1
FOXM1-GATAD2B	ENSG00000087087	7	100449868	100450388	100449611	100450131	HiC_interaction_with_promoter-1
JUND-RELB	ENSG00000087087	7	100464820	100465104	100464795	100465029	HiC_interaction_with_promoter-1
ATF2-RELB	ENSG00000087087	7	100464810	100465101	100464795	100465029	HiC_interaction_with_promoter-1
ATF2-RELB	ENSG00000087087	7	100464742	100465143	100464795	100465029	HiC_interaction_with_promoter-1
ATF2-RELB	ENSG00000087087	7	100464808	100465079	100464795	100465029	HiC_interaction_with_promoter-1
EP300-TAF1	ENSG00000087087	7	100464890	100465230	100464805	100465175	HiC_interaction_with_promoter-1
EP300-TAF1	ENSG00000087087	7	100464890	100465230	100464828	100465188	HiC_interaction_with_promoter-1
EP300-TAF1	ENSG00000087087	7	100434976	100435316	100464805	100465175	HiC_interaction_with_promoter-1
EP300-TAF1	ENSG00000087087	7	100434976	100435316	100464828	100465188	HiC_interaction_with_promoter-1
EP300-TAF1	ENSG00000087087	7	100464890	100465226	100464805	100465175	HiC_interaction_with_promoter-1
EP300-TAF1	ENSG00000087087	7	100464890	100465226	100464828	100465188	HiC_interaction_with_promoter-1
ATF2-JUND	ENSG00000087087	7	100464810	100465101	100464820	100465104	HiC_interaction_with_promoter-1
ATF2-JUND	ENSG00000087087	7	100464742	100465143	100464820	100465104	HiC_interaction_with_promoter-1
ATF2-JUND	ENSG00000087087	7	100464808	100465079	100464820	100465104	HiC_interaction_with_promoter-1
ATF2-RELB	ENSG00000087111	17	26894677	26895035	26894503	26895023	HiC_interaction_with_promoter-1
ATF2-RELB	ENSG00000087111	17	26894887	26895135	26894503	26895023	HiC_interaction_with_promoter-1
FOXM1-GATAD2B	ENSG00000087157	17	76374693	76375213	76384620	76385140	HiC_interaction_with_promoter-1
ATF2-RELB	ENSG00000087157	17	76374623	76375004	76384649	76385153	HiC_interaction_with_promoter-1
FOXM1-GATAD2B	ENSG00000087191	17	61904751	61905271	61919906	61920426	HiC_interaction_with_promoter-1
FOXM1-GATAD2B	ENSG00000087191	17	61919756	61920280	61919906	61920426	HiC_interaction_with_promoter-1
FOXM1-GATAD2B	ENSG00000087191	17	61904954	61905474	61919906	61920426	HiC_interaction_with_promoter-1
FOXM1-GATAD2B	ENSG00000087191	17	61919756	61920267	61919906	61920426	HiC_interaction_with_promoter-1
JUND-RELB	ENSG00000087191	17	61919940	61920431	61919951	61920235	HiC_interaction_with_promoter-1
JUND-RELB	ENSG00000087191	17	61904718	61905318	61919951	61920235	HiC_interaction_with_promoter-1
ESRRA-JUND	ENSG00000087191	17	61919908	61920272	61919951	61920235	HiC_interaction_with_promoter-1
ATF2-RELB	ENSG00000087191	17	61919938	61920442	61919940	61920431	HiC_interaction_with_promoter-1
SRF-ZNF592	ENSG00000087191	17	61919940	61920224	61919975	61920355	HiC_interaction_with_promoter-1
SRF-ZNF592	ENSG00000087191	17	61919940	61920224	61919955	61920179	HiC_interaction_with_promoter-1
SRF-ZNF592	ENSG00000087191	17	61919940	61920224	61919970	61920170	HiC_interaction_with_promoter-1
ARID3A-GATAD2B	ENSG00000087191	17	61904751	61905271	61919924	61920263	HiC_interaction_with_promoter-1
ARID3A-GATAD2B	ENSG00000087191	17	61919756	61920280	61919924	61920263	HiC_interaction_with_promoter-1
ARID3A-GATAD2B	ENSG00000087191	17	61904954	61905474	61919924	61920263	HiC_interaction_with_promoter-1
ARID3A-GATAD2B	ENSG00000087191	17	61919756	61920267	61919924	61920263	HiC_interaction_with_promoter-1
RELB-ZNF592	ENSG00000087191	17	61919940	61920224	61919940	61920431	HiC_interaction_with_promoter-1
JUND-ZNF24	ENSG00000087191	17	61919951	61920235	61919936	61920266	HiC_interaction_with_promoter-1
FOXM1-PKNOX1	ENSG00000087191	17	61919987	61920281	61919906	61920426	HiC_interaction_with_promoter-1
ATF2-ESRRA	ENSG00000087191	17	61919938	61920442	61919908	61920272	HiC_interaction_with_promoter-1
EP300-TAF1	ENSG00000087191	17	61919995	61920186	61919894	61920244	HiC_interaction_with_promoter-1
EP300-TAF1	ENSG00000087191	17	61919995	61920186	61919966	61920236	HiC_interaction_with_promoter-1
EP300-TAF1	ENSG00000087191	17	61919995	61920186	61919913	61920283	HiC_interaction_with_promoter-1
EP300-TAF1	ENSG00000087191	17	61919995	61920186	61919961	61920241	HiC_interaction_with_promoter-1
EP300-TAF1	ENSG00000087191	17	61919995	61920186	61919918	61920278	HiC_interaction_with_promoter-1
ATF2-JUND	ENSG00000087191	17	61919938	61920442	61919951	61920235	HiC_interaction_with_promoter-1
RELB-STAT1	ENSG00000087191	17	61919940	61920431	61919902	61920266	HiC_interaction_with_promoter-1
RELB-STAT1	ENSG00000087191	17	61904718	61905318	61919902	61920266	HiC_interaction_with_promoter-1
RELB-STAT1	ENSG00000087191	17	61904718	61905318	61904714	61905078	HiC_interaction_with_promoter-1
ASH2L-MAZ	ENSG00000087263	16	56484683	56485107	56484798	56485382	HiC_interaction_with_promoter-1
EP300-PBX3	ENSG00000087269	4	2964843	2965213	2964997	2965213	HiC_interaction_with_promoter-1
EP300-PBX3	ENSG00000087269	4	2964841	2965201	2964997	2965213	HiC_interaction_with_promoter-1
EP300-TAF1	ENSG00000087269	4	2964843	2965213	2964919	2965259	HiC_interaction_with_promoter-1
EP300-TAF1	ENSG00000087269	4	2964843	2965213	2964921	2965257	HiC_interaction_with_promoter-1
EP300-TAF1	ENSG00000087269	4	2964841	2965201	2964919	2965259	HiC_interaction_with_promoter-1
EP300-TAF1	ENSG00000087269	4	2964841	2965201	2964921	2965257	HiC_interaction_with_promoter-1
BCL3-HDAC2	ENSG00000087269	4	2944809	2945153	2964731	2965247	HiC_interaction_with_promoter-1
GATAD2B-PBX3	ENSG00000087269	4	2964749	2965269	2964997	2965213	HiC_interaction_with_promoter-1
FOXM1-PKNOX1	ENSG00000088247	19	6424663	6425845	6424760	6425280	HiC_interaction_with_promoter-1
MAZ-PBX3	ENSG00000088247	19	6424820	6425621	6424657	6425093	HiC_interaction_with_promoter-1
MAZ-PBX3	ENSG00000088247	19	6424820	6425621	6424668	6425092	HiC_interaction_with_promoter-1
MAZ-PBX3	ENSG00000088247	19	6424799	6425585	6424657	6425093	HiC_interaction_with_promoter-1
MAZ-PBX3	ENSG00000088247	19	6424799	6425585	6424668	6425092	HiC_interaction_with_promoter-1
RELB-STAT1	ENSG00000088247	19	6424977	6425577	6459985	6460415	HiC_interaction_with_promoter-1
ARID3A-GATAD2B	ENSG00000088256	19	3094561	3095081	3154973	3155323	HiC_interaction_with_promoter-1
ARID3A-GATAD2B	ENSG00000088256	19	3094763	3095283	3154973	3155323	HiC_interaction_with_promoter-1
GATAD2B-RELA	ENSG00000088256	19	3094561	3095081	3154982	3155366	HiC_interaction_with_promoter-1
GATAD2B-RELA	ENSG00000088256	19	3094763	3095283	3154982	3155366	HiC_interaction_with_promoter-1
GATAD2B-PBX3	ENSG00000088340	20	34204727	34205247	34204859	34205079	HiC_interaction_with_promoter-1
GATAD2B-PBX3	ENSG00000088340	20	34204727	34205247	34204861	34205077	HiC_interaction_with_promoter-1
GATAD2B-PBX3	ENSG00000088340	20	34129684	34130204	34204859	34205079	HiC_interaction_with_promoter-1
GATAD2B-PBX3	ENSG00000088340	20	34129684	34130204	34204861	34205077	HiC_interaction_with_promoter-1
RELB-STAT1	ENSG00000088340	20	34129772	34130136	34129652	34130252	HiC_interaction_with_promoter-1
ASH2L-MAZ	ENSG00000088356	20	30539615	30540199	30539711	30540135	HiC_interaction_with_promoter-1
ATF2-ESRRA	ENSG00000088356	20	30539743	30540107	30539787	30540291	HiC_interaction_with_promoter-1
ATF2-NRF1	ENSG00000088387	13	99644566	99645070	99739849	99740099	HiC_interaction_with_promoter-1
ATF2-NRF1	ENSG00000088387	13	99644593	99645113	99739849	99740099	HiC_interaction_with_promoter-1
FOXM1-PKNOX1	ENSG00000088448	13	111594629	111595053	111594542	111595062	HiC_interaction_with_promoter-1
ATF2-RELB	ENSG00000088448	13	111594511	111595015	111594576	111595176	HiC_interaction_with_promoter-1
ATF2-RELB	ENSG00000088448	13	111594711	111595215	111594576	111595176	HiC_interaction_with_promoter-1
GATAD2B-PBX3	ENSG00000088543	3	50604813	50605029	50654591	50655111	HiC_interaction_with_promoter-1
GATAD2B-PBX3	ENSG00000088543	3	50604813	50605029	50604816	50605336	HiC_interaction_with_promoter-1
GATAD2B-PBX3	ENSG00000088543	3	50604813	50605029	50654792	50655312	HiC_interaction_with_promoter-1
GATAD2B-PBX3	ENSG00000088543	3	50604811	50605031	50654591	50655111	HiC_interaction_with_promoter-1
GATAD2B-PBX3	ENSG00000088543	3	50604811	50605031	50604816	50605336	HiC_interaction_with_promoter-1
GATAD2B-PBX3	ENSG00000088543	3	50604811	50605031	50654792	50655312	HiC_interaction_with_promoter-1
MAZ-PBX3	ENSG00000088543	3	50604813	50605029	50654758	50655182	HiC_interaction_with_promoter-1
MAZ-PBX3	ENSG00000088543	3	50604811	50605031	50654758	50655182	HiC_interaction_with_promoter-1
ARID3A-GATAD2B	ENSG00000088836	20	3189859	3190379	3219721	3220071	HiC_interaction_with_promoter-1
ASH2L-MAZ	ENSG00000088836	20	3189745	3190329	3219701	3220137	HiC_interaction_with_promoter-1
ASH2L-MAZ	ENSG00000088836	20	3189745	3190329	3219704	3220128	HiC_interaction_with_promoter-1
ASH2L-MAZ	ENSG00000088836	20	3189745	3190329	3219909	3220333	HiC_interaction_with_promoter-1
ASH2L-MAZ	ENSG00000088836	20	3189745	3190329	3189985	3190409	HiC_interaction_with_promoter-1
ASH2L-MAZ	ENSG00000088836	20	3189982	3190566	3219701	3220137	HiC_interaction_with_promoter-1
ASH2L-MAZ	ENSG00000088836	20	3189982	3190566	3219704	3220128	HiC_interaction_with_promoter-1
ASH2L-MAZ	ENSG00000088836	20	3189982	3190566	3219909	3220333	HiC_interaction_with_promoter-1
ASH2L-MAZ	ENSG00000088836	20	3189982	3190566	3189985	3190409	HiC_interaction_with_promoter-1
FOXK2-MTA2	ENSG00000088876	20	2489791	2490201	2489516	2490076	HiC_interaction_with_promoter-1
EP300-TAF1	ENSG00000088876	20	2489632	2490002	2489752	2490088	HiC_interaction_with_promoter-1
EP300-TAF1	ENSG00000088876	20	2489632	2490002	2489750	2490090	HiC_interaction_with_promoter-1
EP300-TAF1	ENSG00000088876	20	2489658	2490018	2489752	2490088	HiC_interaction_with_promoter-1
EP300-TAF1	ENSG00000088876	20	2489658	2490018	2489750	2490090	HiC_interaction_with_promoter-1
FOXM1-PKNOX1	ENSG00000089006	20	17884604	17885124	17939895	17940290	HiC_interaction_with_promoter-1
ARID3A-GATAD2B	ENSG00000089022	12	112279705	112280055	112279931	112280106	HiC_interaction_with_promoter-1
ASH2L-MAZ	ENSG00000089022	12	112279539	112280123	112279577	112280013	HiC_interaction_with_promoter-1
ASH2L-MAZ	ENSG00000089022	12	112279539	112280123	112279582	112280006	HiC_interaction_with_promoter-1
RELB-ZNF592	ENSG00000089022	12	112279487	112280021	112279763	112280047	HiC_interaction_with_promoter-1
EP300-TAF1	ENSG00000089022	12	112279787	112280123	112279820	112280180	HiC_interaction_with_promoter-1
EP300-TAF1	ENSG00000089022	12	112279787	112280123	112279746	112280116	HiC_interaction_with_promoter-1
EP300-TAF1	ENSG00000089022	12	112279784	112280124	112279820	112280180	HiC_interaction_with_promoter-1
EP300-TAF1	ENSG00000089022	12	112279784	112280124	112279746	112280116	HiC_interaction_with_promoter-1
RELB-STAT1	ENSG00000089022	12	112279487	112280021	112279770	112280134	HiC_interaction_with_promoter-1
FOXM1-GATAD2B	ENSG00000089053	12	121714746	121715266	121789806	121790326	HiC_interaction_with_promoter-1
GATAD2B-RELA	ENSG00000089053	12	121714789	121715173	121789806	121790326	HiC_interaction_with_promoter-1
JUND-RELB	ENSG00000089057	20	5019865	5020375	5019816	5020100	HiC_interaction_with_promoter-1
ESRRA-JUND	ENSG00000089057	20	4799862	4800226	5019816	5020100	HiC_interaction_with_promoter-1
ATF2-RELB	ENSG00000089057	20	5019974	5020112	5019865	5020375	HiC_interaction_with_promoter-1
ATF2-RELB	ENSG00000089057	20	5019779	5020283	5019865	5020375	HiC_interaction_with_promoter-1
JUND-ZNF24	ENSG00000089057	20	5019816	5020100	5019994	5020324	HiC_interaction_with_promoter-1
ATF2-ESRRA	ENSG00000089057	20	4799862	4800226	5019974	5020112	HiC_interaction_with_promoter-1
ATF2-ESRRA	ENSG00000089057	20	4799862	4800226	5019779	5020283	HiC_interaction_with_promoter-1
EP300-TAF1	ENSG00000089057	20	4794772	4795112	5019875	5020225	HiC_interaction_with_promoter-1
EP300-TAF1	ENSG00000089057	20	4794772	4795112	5019893	5020253	HiC_interaction_with_promoter-1
EP300-TAF1	ENSG00000089057	20	4794772	4795112	5019861	5020217	HiC_interaction_with_promoter-1
EP300-TAF1	ENSG00000089057	20	4794772	4795112	5019889	5020259	HiC_interaction_with_promoter-1
RELB-SPI1	ENSG00000089057	20	4799985	4800170	5019865	5020375	HiC_interaction_with_promoter-1
RELB-SPI1	ENSG00000089057	20	4794927	4795105	5019865	5020375	HiC_interaction_with_promoter-1
ATF2-JUND	ENSG00000089057	20	5019974	5020112	5019816	5020100	HiC_interaction_with_promoter-1
ATF2-JUND	ENSG00000089057	20	5019779	5020283	5019816	5020100	HiC_interaction_with_promoter-1
EP300-PBX3	ENSG00000089063	20	5054961	5055331	5099947	5100163	HiC_interaction_with_promoter-1
GATAD2B-PBX3	ENSG00000089063	20	5054746	5055266	5099947	5100163	HiC_interaction_with_promoter-1
GATAD2B-PBX3	ENSG00000089063	20	5054945	5055465	5099947	5100163	HiC_interaction_with_promoter-1
CREM-RELA	ENSG00000089063	20	5099930	5100290	5099815	5100199	HiC_interaction_with_promoter-1
MAZ-PBX3	ENSG00000089063	20	5099947	5100163	5099957	5100393	HiC_interaction_with_promoter-1
GATAD2B-RELA	ENSG00000089063	20	5054746	5055266	5099815	5100199	HiC_interaction_with_promoter-1
GATAD2B-RELA	ENSG00000089063	20	5054945	5055465	5099815	5100199	HiC_interaction_with_promoter-1
ASH2L-MAZ	ENSG00000089063	20	5099972	5100556	5099957	5100393	HiC_interaction_with_promoter-1
BCL3-HDAC2	ENSG00000089063	20	5054972	5055328	5099950	5100466	HiC_interaction_with_promoter-1
BCL3-HDAC2	ENSG00000089063	20	5054978	5055322	5099950	5100466	HiC_interaction_with_promoter-1
ATF2-RELB	ENSG00000089094	12	121829560	121830064	121989569	121990169	HiC_interaction_with_promoter-1
ATF2-RELB	ENSG00000089094	12	121829560	121830064	122014742	122015053	HiC_interaction_with_promoter-1
ATF2-RELB	ENSG00000089094	12	121829560	121830064	122014943	122015543	HiC_interaction_with_promoter-1
CREM-RELA	ENSG00000089094	12	121974972	121975332	122014631	122015015	HiC_interaction_with_promoter-1
CREM-RELA	ENSG00000089094	12	121829786	121830146	122014631	122015015	HiC_interaction_with_promoter-1
ARID3A-GATAD2B	ENSG00000089127	12	113344693	113345213	113344786	113345136	HiC_interaction_with_promoter-1
ATF2-RELB	ENSG00000089127	12	113344688	113345192	113344780	113345380	HiC_interaction_with_promoter-1
RELB-STAT1	ENSG00000089127	12	113344666	113345030	113344780	113345380	HiC_interaction_with_promoter-1
MLLT1-RFX5	ENSG00000089163	12	120729790	120730126	120739976	120740313	HiC_interaction_with_promoter-1
ASH2L-JUND	ENSG00000089163	12	120729967	120730551	120739992	120740276	HiC_interaction_with_promoter-1
ASH2L-JUND	ENSG00000089163	12	120739713	120740297	120739992	120740276	HiC_interaction_with_promoter-1
JUND-RELB	ENSG00000089163	12	120739992	120740276	120739997	120740422	HiC_interaction_with_promoter-1
ATF2-RELB	ENSG00000089163	12	120729701	120730147	120739997	120740422	HiC_interaction_with_promoter-1
CREM-RELA	ENSG00000089163	12	120739941	120740325	120739885	120740245	HiC_interaction_with_promoter-1
MAZ-PBX3	ENSG00000089163	12	120729673	120730097	120739952	120740168	HiC_interaction_with_promoter-1
MAZ-PBX3	ENSG00000089163	12	120729673	120730097	120739993	120740064	HiC_interaction_with_promoter-1
ASH2L-MAZ	ENSG00000089163	12	120729673	120730097	120729967	120730551	HiC_interaction_with_promoter-1
ASH2L-MAZ	ENSG00000089163	12	120729673	120730097	120739713	120740297	HiC_interaction_with_promoter-1
ATF2-JUND	ENSG00000089163	12	120729701	120730147	120739992	120740276	HiC_interaction_with_promoter-1
ARID3A-GATAD2B	ENSG00000089327	19	35644550	35645070	35704811	35705161	HiC_interaction_with_promoter-1
ATF2-RELB	ENSG00000089327	19	35614946	35615546	35704647	35705167	HiC_interaction_with_promoter-1
ATF2-RELB	ENSG00000089327	19	35614946	35615546	35614818	35615338	HiC_interaction_with_promoter-1
ATF2-RELB	ENSG00000089327	19	35614946	35615546	35614871	35615375	HiC_interaction_with_promoter-1
ATF2-RELB	ENSG00000089327	19	35614946	35615546	35704666	35705170	HiC_interaction_with_promoter-1
RELB-SPI1	ENSG00000089351	19	35479764	35480364	35479750	35480026	HiC_interaction_with_promoter-1
RELB-SPI1	ENSG00000089351	19	35479608	35480022	35479750	35480026	HiC_interaction_with_promoter-1
RELB-STAT1	ENSG00000089351	19	35479764	35480364	35489802	35490232	HiC_interaction_with_promoter-1
RELB-STAT1	ENSG00000089351	19	35479608	35480022	35489802	35490232	HiC_interaction_with_promoter-1
FOXM1-PKNOX1	ENSG00000089597	11	62379809	62380329	62439660	62440084	HiC_interaction_with_promoter-1
ATF2-RELB	ENSG00000089639	19	19754678	19755182	19754419	19755019	HiC_interaction_with_promoter-1
CREM-RELA	ENSG00000089685	17	76164996	76165380	76164979	76165339	HiC_interaction_with_promoter-1
FOXM1-GATAD2B	ENSG00000089775	14	64929932	64930452	64929832	64930352	HiC_interaction_with_promoter-1
ATF2-RELB	ENSG00000089775	14	64929863	64930383	64974956	64975556	HiC_interaction_with_promoter-1
ATF2-RELB	ENSG00000089775	14	64929863	64930383	64929733	64930333	HiC_interaction_with_promoter-1
ATF2-RELB	ENSG00000089775	14	64929863	64930383	64929946	64930546	HiC_interaction_with_promoter-1
ATF2-RELB	ENSG00000089775	14	64929874	64930378	64974956	64975556	HiC_interaction_with_promoter-1
ATF2-RELB	ENSG00000089775	14	64929874	64930378	64929733	64930333	HiC_interaction_with_promoter-1
ATF2-RELB	ENSG00000089775	14	64929874	64930378	64929946	64930546	HiC_interaction_with_promoter-1
ATF2-RELB	ENSG00000089775	14	64974994	64975514	64974956	64975556	HiC_interaction_with_promoter-1
ATF2-RELB	ENSG00000089775	14	64974999	64975503	64974956	64975556	HiC_interaction_with_promoter-1
ARID3A-GATAD2B	ENSG00000089775	14	64929864	64930214	64929832	64930352	HiC_interaction_with_promoter-1
FOXM1-PKNOX1	ENSG00000089775	14	64929932	64930452	64929831	64930255	HiC_interaction_with_promoter-1
GATAD2B-RELA	ENSG00000089818	12	8234597	8235117	8234675	8235059	HiC_interaction_with_promoter-1
MAZ-PBX3	ENSG00000089818	12	8189996	8190212	8234687	8235123	HiC_interaction_with_promoter-1
MAZ-PBX3	ENSG00000089818	12	8189996	8190212	8234701	8235125	HiC_interaction_with_promoter-1
MAZ-PBX3	ENSG00000089818	12	8189994	8190214	8234687	8235123	HiC_interaction_with_promoter-1
MAZ-PBX3	ENSG00000089818	12	8189994	8190214	8234701	8235125	HiC_interaction_with_promoter-1
ATF2-RELB	ENSG00000089818	12	8234846	8235157	8234624	8235128	HiC_interaction_with_promoter-1
ATF2-RELB	ENSG00000089818	12	8189724	8190324	8234624	8235128	HiC_interaction_with_promoter-1
ATF2-RELB	ENSG00000089818	12	8189522	8190122	8234624	8235128	HiC_interaction_with_promoter-1
RELB-STAT1	ENSG00000089818	12	8234846	8235157	8234887	8235251	HiC_interaction_with_promoter-1
RELB-STAT1	ENSG00000089818	12	8189724	8190324	8234887	8235251	HiC_interaction_with_promoter-1
RELB-STAT1	ENSG00000089818	12	8189522	8190122	8234887	8235251	HiC_interaction_with_promoter-1
GATAD2B-PBX3	ENSG00000089818	12	8189996	8190212	8234597	8235117	HiC_interaction_with_promoter-1
GATAD2B-PBX3	ENSG00000089818	12	8189994	8190214	8234597	8235117	HiC_interaction_with_promoter-1
JUND-RELB	ENSG00000089902	14	103039676	103040276	103174952	103175262	HiC_interaction_with_promoter-1
ATF2-RELB	ENSG00000089902	14	103039676	103040276	103244930	103245434	HiC_interaction_with_promoter-1
ATF2-RELB	ENSG00000089902	14	103039676	103040276	103234498	103235002	HiC_interaction_with_promoter-1
ATF2-RELB	ENSG00000089902	14	103039676	103040276	103234486	103235006	HiC_interaction_with_promoter-1
RELB-SPI1	ENSG00000089902	14	103039676	103040276	103039930	103040190	HiC_interaction_with_promoter-1
SRF-ZNF592	ENSG00000089916	14	76629962	76630311	76664950	76665234	HiC_interaction_with_promoter-1
GATAD2B-PBX3	ENSG00000090104	1	192544811	192545031	192544749	192545269	HiC_interaction_with_promoter-1
GATAD2B-PBX3	ENSG00000090104	1	192544796	192545012	192544749	192545269	HiC_interaction_with_promoter-1
SRF-ZNF592	ENSG00000090104	1	192544901	192545185	192544633	192545013	HiC_interaction_with_promoter-1
ARID3A-GATAD2B	ENSG00000090104	1	192544669	192545019	192544749	192545269	HiC_interaction_with_promoter-1
MAZ-PBX3	ENSG00000090104	1	192544779	192545215	192544811	192545031	HiC_interaction_with_promoter-1
MAZ-PBX3	ENSG00000090104	1	192544779	192545215	192544796	192545012	HiC_interaction_with_promoter-1
MAZ-PBX3	ENSG00000090104	1	192544788	192545212	192544811	192545031	HiC_interaction_with_promoter-1
MAZ-PBX3	ENSG00000090104	1	192544788	192545212	192544796	192545012	HiC_interaction_with_promoter-1
GATAD2B-RELA	ENSG00000090104	1	192544628	192545012	192544749	192545269	HiC_interaction_with_promoter-1
MAZ-PBX3	ENSG00000090339	19	10349917	10350341	10369793	10370009	HiC_interaction_with_promoter-1
MAZ-PBX3	ENSG00000090339	19	10349937	10350373	10369793	10370009	HiC_interaction_with_promoter-1
RELB-SPI1	ENSG00000090376	12	66584695	66585295	66584942	66585185	HiC_interaction_with_promoter-1
FOXM1-GATAD2B	ENSG00000090520	3	186284721	186285241	186284955	186285475	HiC_interaction_with_promoter-1
ARID3A-GATAD2B	ENSG00000090520	3	186284721	186285241	186284972	186285322	HiC_interaction_with_promoter-1
ASH2L-MAZ	ENSG00000090520	3	186284834	186285258	186284769	186285353	HiC_interaction_with_promoter-1
ASH2L-MAZ	ENSG00000090520	3	186284846	186285282	186284769	186285353	HiC_interaction_with_promoter-1
FOXM1-GATAD2B	ENSG00000090554	19	49954671	49955191	49954774	49955294	HiC_interaction_with_promoter-1
SMAD1-ZNF592	ENSG00000090554	19	49954912	49955339	49999629	50000013	HiC_interaction_with_promoter-1
SMAD1-ZNF592	ENSG00000090554	19	49954912	49955339	49954771	49955155	HiC_interaction_with_promoter-1
ATF2-RELB	ENSG00000090554	19	49954691	49955291	49954907	49955411	HiC_interaction_with_promoter-1
ATF2-RELB	ENSG00000090554	19	49954691	49955291	49954977	49955497	HiC_interaction_with_promoter-1
ARID3A-GATAD2B	ENSG00000090554	19	49954671	49955191	49999735	50000085	HiC_interaction_with_promoter-1
RELB-ZNF592	ENSG00000090554	19	49954691	49955291	49954912	49955339	HiC_interaction_with_promoter-1
GATAD2B-RELA	ENSG00000090554	19	49954671	49955191	49999667	50000051	HiC_interaction_with_promoter-1
FOXK2-MTA2	ENSG00000090554	19	49954992	49955213	49954784	49955344	HiC_interaction_with_promoter-1
FOXK2-MTA2	ENSG00000090554	19	49954992	49955213	49954582	49955142	HiC_interaction_with_promoter-1
FOXM1-PKNOX1	ENSG00000090554	19	49954873	49955423	49954774	49955294	HiC_interaction_with_promoter-1
JUND-RELB	ENSG00000090686	1	22109902	22110163	22109994	22110278	HiC_interaction_with_promoter-1
ATF2-RELB	ENSG00000090686	1	22109841	22110345	22109902	22110163	HiC_interaction_with_promoter-1
ATF2-RELB	ENSG00000090686	1	22109971	22110237	22109902	22110163	HiC_interaction_with_promoter-1
ATF2-RELB	ENSG00000090686	1	22109833	22110353	22109902	22110163	HiC_interaction_with_promoter-1
ATF2-JUND	ENSG00000090686	1	22109841	22110345	22109994	22110278	HiC_interaction_with_promoter-1
ATF2-JUND	ENSG00000090686	1	22109971	22110237	22109994	22110278	HiC_interaction_with_promoter-1
ATF2-JUND	ENSG00000090686	1	22109833	22110353	22109994	22110278	HiC_interaction_with_promoter-1
RELB-STAT1	ENSG00000090686	1	22109821	22110185	22109902	22110163	HiC_interaction_with_promoter-1
FOXM1-PKNOX1	ENSG00000090863	16	74614702	74615222	74639608	74640032	HiC_interaction_with_promoter-1
RELB-SPI1	ENSG00000090975	12	123459074	123460019	123599889	123600165	HiC_interaction_with_promoter-1
ATF2-RELB	ENSG00000090975	12	123459074	123460019	123599928	123600432	HiC_interaction_with_promoter-1
ATF2-RELB	ENSG00000090975	12	123459074	123460019	123599920	123600440	HiC_interaction_with_promoter-1
MLLT1-RFX5	ENSG00000090989	4	56719481	56720057	56719790	56720126	HiC_interaction_with_promoter-1
RELB-STAT1	ENSG00000090989	4	56719814	56720178	56719605	56720205	HiC_interaction_with_promoter-1
FOXM1-GATAD2B	ENSG00000091542	17	18064503	18065023	18064666	18065186	HiC_interaction_with_promoter-1
ATF2-RELB	ENSG00000091542	17	18064500	18065100	18064497	18065001	HiC_interaction_with_promoter-1
ATF2-RELB	ENSG00000091542	17	18064500	18065100	18064484	18065004	HiC_interaction_with_promoter-1
ATF2-RELB	ENSG00000091542	17	18064701	18065301	18064497	18065001	HiC_interaction_with_promoter-1
ATF2-RELB	ENSG00000091542	17	18064701	18065301	18064484	18065004	HiC_interaction_with_promoter-1
FOXM1-PKNOX1	ENSG00000091542	17	18064920	18065172	18064503	18065023	HiC_interaction_with_promoter-1
ATF2-RELB	ENSG00000091640	17	4849638	4850003	4849525	4850029	HiC_interaction_with_promoter-1
ATF2-RELB	ENSG00000091640	17	4849730	4850330	4849525	4850029	HiC_interaction_with_promoter-1
MLLT1-RFX5	ENSG00000092094	14	20929994	20930397	20929767	20930103	HiC_interaction_with_promoter-1
MLLT1-RFX5	ENSG00000092094	14	20929994	20930397	20929765	20930101	HiC_interaction_with_promoter-1
ATF2-NRF1	ENSG00000092094	14	20929728	20930232	20929865	20930115	HiC_interaction_with_promoter-1
ATF2-NRF1	ENSG00000092094	14	20929928	20930432	20929865	20930115	HiC_interaction_with_promoter-1
ATF2-NRF1	ENSG00000092094	14	20929706	20930226	20929865	20930115	HiC_interaction_with_promoter-1
[truncated: 19,386 more rows]
